# Supplementary material for: Proactive approaches to identifying dementia and dementia risk; a qualitative study of public attitudes and preferences
Source: PubMed Central journal article supplement — BMJ Open. 2018 Feb 3;8(2):e018677. doi: 10.1136/bmjopen-2017-018677 (PMC5829774; doi:10.1136/bmjopen-2017-018677), 2018-02-03
Supplement: bmjopen-2017-018677.draft_revisions.pdf [file bmjopen-2017-018677.draft_revisions.pdf]

# BMJ Open

BMJ Open is committed to open peer review. As part of this commitment we make the peer review history of every article we publish publicly available.

When an article is published we post the peer reviewers' comments and the authors' responses online. We also post the versions of the paper that were used during peer review. These are the versions that the peer review comments apply to.

The versions of the paper that follow are the versions that were submitted during the peer review process. They are not the versions of record or the final published versions. They should not be cited or distributed as the published version of this manuscript.

BMJ Open is an open access journal and the full, final, typeset and author-corrected version of record of the manuscript is available on our site with no access controls, subscription charges or pay-per-view fees (<http://bmjopen.bmj.com>).

If you have any questions on BMJ Open's open peer review process please email [editorial.bmjopen@bmj.com](mailto:editorial.bmjopen@bmj.com)

# BMJ Open

## Proactive approaches to identifying dementia and dementia risk; a qualitative study of public attitudes and preferences

|                                 |                                                                                                                                                                                                                                                                                                                                                                                                                                                             |
|---------------------------------|-------------------------------------------------------------------------------------------------------------------------------------------------------------------------------------------------------------------------------------------------------------------------------------------------------------------------------------------------------------------------------------------------------------------------------------------------------------|
| Journal:                        | <i>BMJ Open</i>                                                                                                                                                                                                                                                                                                                                                                                                                                             |
| Manuscript ID                   | bmjopen-2017-018677                                                                                                                                                                                                                                                                                                                                                                                                                                         |
| Article Type:                   | Research                                                                                                                                                                                                                                                                                                                                                                                                                                                    |
| Date Submitted by the Author:   | 18-Jul-2017                                                                                                                                                                                                                                                                                                                                                                                                                                                 |
| Complete List of Authors:       | Robinson, Louise; Institute for Health and Society, Newcastle University<br>Dickinson, Claire; Institute for Health and Society, Newcastle University<br>Magklara, Eleni; Institute for Health and Society, Newcastle University<br>Newton, Lisa; Institute for Health and Society, Newcastle University<br>Prato, Laura; Institute for Health and Society, Newcastle University<br>Bamford, Claire; Institute for Health and Society, Newcastle University |
| <b>Primary Subject Heading</b>: | Mental health                                                                                                                                                                                                                                                                                                                                                                                                                                               |
| Secondary Subject Heading:      | General practice / Family practice, Global health, Public health                                                                                                                                                                                                                                                                                                                                                                                            |
| Keywords:                       | Organisation of health services < HEALTH SERVICES ADMINISTRATION & MANAGEMENT, Risk management < HEALTH SERVICES ADMINISTRATION & MANAGEMENT, Dementia < NEUROLOGY                                                                                                                                                                                                                                                                                          |
|                                 |                                                                                                                                                                                                                                                                                                                                                                                                                                                             |

SCHOLARONE™  
Manuscripts

Peer Review Only

1  
2  
3 **Proactive approaches to identifying dementia and dementia risk; a**  
4 **qualitative study of public attitudes and preferences**  
5  
6  
7  
8

9 Louise Robinson, Claire Dickinson, Eleni Magklara, Lisa Newton, Laura Prato, Claire Bamford.

10 All of the Institute of Health & Society, Newcastle University, Newcastle upon Tyne, UK.  
11  
12

13  
14 Corresponding author and Guarantor for the paper: Louise Robinson, Institute of Health & Society,  
15 Newcastle University, Campus for Ageing and Vitality, Biomedical Research Building, Newcastle upon  
16 Tyne, NE4 5PL.

17 Email: [a.l.robinson@newcastle.ac.uk](mailto:a.l.robinson@newcastle.ac.uk)

18 Telephone: 0191 2082014; Fax: 0191 2081101  
19  
20

21  
22 Keywords: Organisation of health services; Risk management; Dementia  
23

24 Word count: 4000  
25  
26  
27  
28  
29  
30  
31  
32  
33  
34  
35  
36  
37  
38  
39  
40  
41  
42  
43  
44  
45  
46  
47  
48  
49  
50  
51  
52  
53  
54  
55  
56  
57  
58  
59  
60

## ABSTRACT

**Objectives:** The aim of this study was to critically explore the views of the public about the acceptability and feasibility of proactive approaches to earlier dementia diagnosis and also identification of people at high risk of dementia.

**Design:** Qualitative study using task group methodology and thematic data analysis.

**Setting:** Task groups were held either at the University (n=5) or a carers' centre (n=1).

**Participants:** A convenience sample of 31 of 54 participants identified by local non-statutory agencies took part in a task group. All were aged between 40 and 80, 21 women and ten men participated.

**Results:** Despite the use of task group methodology, participants expressed limited understandings of dementia and confusion between proactive approaches. Nevertheless, they highlighted a range of potential benefits and limitations of proactive approaches and the ethical issues raised. There was a preference to embed risk assessment within routine health checks, which focused on achieving a healthier lifestyle, rather than specifically on dementia. Participants emphasised the need to ensure informed consent prior to use of proactive approaches and to provide appropriate support. They also suggested alternative approaches that could potentially facilitate the early detection of dementia or reduce risk at a population level.

**Conclusions:** As international policy on dementia shifts towards a prevention agenda there is growing interest in identifying those at risk of developing dementia. This study provides useful insights into the acceptability of the use of such proactive approaches amongst the public. The introduction of proactive approaches to dementia identification raises complex practical and ethical issues, particularly in the context of low public understanding of dementia. The importance of better quality information about dementia (and the likelihood of developing dementia) and provision of psychological support for those undergoing risk assessment were highlighted.

### Strengths and limitations of this study

- This study provides much needed insight into public views on the wide range of proactive approaches to earlier identification of dementia and those at high risk of developing dementia
- Participants were positive towards embedding proactive approaches to earlier identification of dementia within routine health checks which focused on healthier ageing
- Despite the provision of information on proactive approaches, participants could not accurately distinguish between them
- Abstract views towards proactive approaches may change if personally facing such assessments

## INTRODUCTION

Dementia has a huge impact on people living with the illness and their families and incurs substantial healthcare and societal costs.<sup>1</sup> Despite an ageing population, there are considerable inconsistencies in incidence and prevalence trends globally.<sup>2-4</sup> A recent systematic review revealed that in high income countries the incidence and prevalence of dementia may be declining, despite steadily ageing populations, probably due to wide scale health promotion activities; meanwhile in China and parts of Asia, figures are increasing possibly due to worsening cardiovascular risk profiles.<sup>4</sup> Although the evidence base around the medical, social and behavioural factors which influence dementia rates is increasing, this is a complex area.<sup>3</sup> Notwithstanding increasing evidence that dementia prevalence and incidence may be linked to large scale, targeted vascular risk reduction and structured chronic illness care for diseases such as diabetes, in addition to increasing age,<sup>5,6</sup> has led to a shift in global and national policy.<sup>7,8</sup> In the absence of a cure, reducing future dementia burden and costs may be best achieved by greater emphasis on prevention which aims to decrease the future number of people developing the illness.<sup>7</sup> Although general population screening for dementia is not currently advocated,<sup>9</sup> identifying groups at high risk of developing dementia and giving tailored advice to reduce individual risk, has been recommended by the World Health Organisation<sup>10</sup> as a cost effective strategy to reduce the global burden of dementia.<sup>7</sup>

This policy shift has resulted in initiatives such as targeted case finding<sup>11,12</sup> opportunistic assessment to identify possible signs of dementia in a patient at high risk of developing dementia (e.g. those aged 75; older people with high vascular risk, learning disabilities and Parkinson's disease<sup>13,14</sup>) being introduced into clinical practice albeit with little evidence of effectiveness. In addition this has led to a growing research focus on developing feasible and valid risk assessment tools to determine, and quantify, a person's risk of developing dementia, with the aim of identifying those who may best benefit from early intervention.<sup>15</sup> Despite the development of new dementia risk assessment tools,<sup>16-18</sup> there has been limited research evaluating their acceptability to patients, the public and health care professionals.<sup>19</sup> A systematic review of attitudes to population screening for dementia recommended further qualitative research to explore public and healthcare professional attitudes towards proactive approaches to dementia identification in greater depth.<sup>20</sup> Determining the barriers and facilitators to the use of dementia risk tools in routine practice is as important as ascertaining their validity.<sup>16</sup> The aim of this study was to critically explore, using qualitative methods, the views of members of the public about the acceptability and feasibility of proactive approaches to earlier diagnosis and identification of people at high risk of dementia.

## METHODS

We anticipated that levels of knowledge about approaches to earlier identification of dementia and risk assessment among the general public would be low and therefore used task group methodology.<sup>21,22</sup> Data collection in task groups is similar to focus group methodology but includes the presentation of evidence and information about the topic under discussion.

The content and format of the task group are summarized in Box 1. The presentations, developed from recent literature reviews, aimed to provide a summary of evidence-based information in a lay format to facilitate informed discussion. A pilot task group was facilitated by CD, LN and LR with staff from Newcastle University with no specific expertise in dementia and refined prior to the main

1  
2  
3 study. Ethical approval for the project was obtained from Newcastle University. A detailed checklist  
4 of methods using the consolidated criteria for qualitative research (COREQ) guidelines<sup>23</sup> is available  
5 in supplementary file 1.  
6

7 Participants were recruited from two local non-statutory organisations:

- 8 i) Voice North, a forum for patient/public involvement in research based in the North East of England  
9 (<http://www.voicenorth.org/>) and  
10  
11 ii) Age UK, a national voluntary organisation, with local branches, which provides services and  
12 support to older people (<http://www.ageuk.org.uk>).  
13

14 The two organisations used different recruitment approaches: Voice North mailed study information  
15 to their members whilst Age UK advertised the study through posters at meetings of family carers.  
16 Both organisations sought consent from interested participants to pass their contact details to the  
17 research team. Potential participants were sent further study information and then contacted by a  
18 researcher who described the study and answered any questions. Participants were assured that  
19 participation was voluntary and that they could withdraw at any time. Written informed consent  
20 was secured from participants prior to each task group.  
21

## 22 Data collection and analysis

23  
24 A further five task groups, facilitated by CD and LN occurred between December 2015 and July 2016,  
25 each lasting approximately 2 hours. Four were held at Newcastle University and the fifth at an  
26 Age UK carers' group. All task groups, including the pilot, were digitally recorded and transcribed  
27 verbatim; transcripts were checked and anonymised.  
28

29  
30 A thematic approach to analysis was adopted.<sup>24</sup> Initially individual researchers read and re-read one  
31 or two transcripts in detail to become familiar with the data. This stage was particularly important  
32 since changes of personnel meant that the analysis was conducted by different researchers (CB, EM,  
33 LP) to those facilitating the task groups (CD, LN). The researchers noted areas of interest and  
34 potential codes independently and then compared ideas and discussed the data in workshops.  
35

36  
37 Following discussion of emergent themes, we developed separate coding frames for facilitator  
38 presentations and group discussions to avoid imposing ideas from the presentations onto participant  
39 data. These were then applied to further transcripts and discussed collectively in a further data  
40 workshop. Once the coding frames had been agreed, they were applied to all transcripts using Nvivo  
41 11. Output relating to each theme and subtheme was then reviewed and a narrative summary  
42 produced independently (by CB, EM, LP). This was thought to be a more effective way of scrutinising  
43 codes than simply checking coding or having two researchers code the data. The narratives were  
44 then compared and discussed in further data workshops. Finally a combined narrative was produced  
45 for each theme which incorporated the insights and perspectives of different researchers. In a final  
46 stage, each transcript was reread in conjunction with the narrative to identify any missing data or  
47 issues that had not been captured.  
48

49  
50 Quotations indicate the focus group (numbered FG1 to FG6), unique participant identifier and  
51 gender.  
52  
53  
54  
55  
56  
57  
58  
59  
60

## RESULTS

Of the 54 people invited to take part, 31 agreed to participate in a task group; six groups were completed, each with between three and seven participants. The majority of participants were female (n=21, 68%). Around half the sample (n=15, 48%) were aged between 60-69 years; 13 (42%) were between 40-59 years and three (10%) were 70+ years. Eighteen (58 %) knew family members or friends with dementia; a small number had personal experience of proactive approaches to identifying dementia.

Four overarching themes were identified, each of which had several subthemes (Table 1). A key theme related to confusion around dementia and proactive approaches. Other themes related to views on proactive approaches, how these might be enacted in practice and alternative approaches that could potentially facilitate the early detection of dementia or reduce risk at a population level.

### Confusion around dementia and proactive approaches

Throughout the task groups there was evidence of limited understandings of dementia and difficulties in distinguishing between approaches such as case finding in high risk groups, risk assessment and genetic screening. We therefore use the generic term '*proactive approaches*' for all of these activities and only differentiate between them where participants were clearly discussing a specific approach. Examples of confusion are illustrated in Box 2 and described below.

#### Limited understandings of dementia

Participants' understanding of dementia varied, even among those with personal experience of the illness. Uncertainty was expressed about the illness trajectory; boundaries between age-related memory decline, mild cognitive impairment and dementia; and the relationship between dementia and specific subtypes e.g. Alzheimer's disease (Box 2).

All task groups discussed the stigma surrounding dementia which was thought to contribute to the lack of understanding of the condition and a reluctance to be open about symptoms. The fear of dementia was linked to the absence of a cure, potential loss of personhood and devastating effects of advanced dementia which were often conveyed through the language used when talking about people with dementia. Nevertheless many participants felt that societal attitudes towards dementia were improving and drew parallels with other once stigmatising conditions, such as cancer.

#### Making sense of proactive approaches

Discussion around specific proactive approaches – case finding, risk assessment and genetic screening – revealed that participants often confused the different methods, sometimes attributing consequences to one approach which related to another. For example, while risk reduction behaviour could reduce the number of people with dementia, case finding would have no impact on prevalence. This distinction was not, however, understood by participants. Participants also voiced opinions which suggested a lack of understanding of specific methods. For example, one participant seemed to think that the case finding method would result in the clear identification of individuals who were going to develop dementia in the future, rather than on identifying those with known risk factors (Box 2).

The role of genes in dementia similarly seemed to be widely misunderstood by participants. While several participants suggested that genetic screening was the most useful of the proactive approaches, their comments seemed to be based on an implicit assumption that a definitive genetic test is available. Few participants seemed to have understood that a deterministic genetic test is currently only relevant to a small number of individuals with Alzheimer's disease. Although this

1  
2  
3 information was included in the presentation, it did not seem to have been understood by  
4 participants many of whom perceived risk of dementia to be largely determined by their personal  
5 family history. One participant, who had previously discussed genetic screening in relation to  
6 another condition, seemed more aware of the nuanced nature of the information, highlighting the  
7 value of personal experience in understanding the issues.  
8

9 There was a widespread tendency for many participants to see the proactive approaches as  
10 providing more definitive information than is the case. The uncertainties surrounding proactive  
11 approaches were challenging for many participants and the importance of help with interpreting  
12 information about risk and how to act on it were stressed.  
13  
14

## 15 16 **Views on proactive approaches to dementia**

17 Despite their confusion about dementia and proactive approaches, several participants expressed  
18 generally positive views towards the concept of proactive approaches, such as ‘the earlier the  
19 diagnosis the better’, without articulating any specific benefits of different methods. Some  
20 participants valued general information on risk reduction but not detailed information about their  
21 personal risk of developing dementia. Only one participant commented that attitudes to proactive  
22 approaches in the abstract might change if personally faced with such approaches. In light of varied  
23 individual preferences one participant suggested that individuals should be provided with a range of  
24 options (Box 3).  
25  
26

## 27 **Perceived benefits and limitations of proactive approaches to dementia**

28 While some participants questioned the value of proactive approaches for a condition for which no  
29 cure was available, others valued the possibility of reducing risk and/or accessing disease-slowing  
30 treatment (Box 3). Early diagnosis and, to a lesser extent, information on risk were also thought to  
31 facilitate planning for the future, both for the individual affected and – often more importantly –  
32 their families. Participants acknowledged that a significant limitation of proactive approaches was  
33 the fact that information did not automatically result in behaviour change. Regardless of whether or  
34 not individuals chose to act on risk information, some participants felt that providing such  
35 information increased individual choice.  
36  
37

## 38 **Psychological consequences of proactive approaches**

39 Views on the psychological consequences of proactive approaches varied. Participants who had  
40 undergone either formal or informal assessment for memory problems described their relief on  
41 finding that they did not have dementia; others felt that even receiving a diagnosis of dementia  
42 could be a relief. In contrast, other participants felt that proactive approaches while they were  
43 asymptomatic (e.g. genetic screening, risk assessment) could create considerable anxiety (Box 3).  
44  
45

46 Perceptions of dementia were thought to influence the psychological consequences of proactive  
47 approaches; participants felt that people who associated dementia with advanced disease would be  
48 afraid of finding out that they were at risk or had a diagnosis of dementia. While discussions focused  
49 primarily on the psychological impacts of being given information about risk or possible diagnosis of  
50 dementia, the potential of proactive approaches to generate stress and anxiety was also highlighted.  
51  
52  
53  
54  
55  
56  
57  
58  
59  
60



## Practical issues in enacting proactive approaches

This theme explores the suggestions made by participants about how proactive approaches might be integrated into practice and the challenges and questions this may raise.

### Existing and potential new opportunities for implementation

The most common suggestion for introducing proactive approaches was to embed them in routine health check-ups, for example, the annual health review of older adults. Since this approach would focus only on older adults, routine risk assessments for younger adults were also suggested, with follow-up for those at higher risk. This was seen as preferable to introducing a new approach focusing exclusively on dementia and thought by participants to 'normalise' the inclusion of potentially anxiety provoking questions concerning memory loss (Box 4). To address rising GP workload and financial pressures on services, participants suggested that self-completion questionnaires linked to patient records could be used or that other members of the primary care team could be involved. A few participants suggested that alternative venues such as community centres or health buses, would offer more relaxed environments for proactive approaches.

### Barriers to implementation of proactive approaches

Participants identified three main barriers to implementing a proactive approach in primary care: access to GPs; a lack of continuity of care and the perceived reluctance of people with dementia to acknowledge their problems and seek help. Participants highlighted the difficulties in getting appointments with GPs and the limited time available within appointments. While participants felt that discussing concerns about memory problems would be easier with a GP with whom they had an established relationship, many had experienced a lack of continuity of care (Box 4).

In addition to these problems, a number of barriers to early diagnosis were identified. Participants suggested that people with dementia or memory problems might be reluctant to seek help and that even those seen by a GP might present themselves in ways which hid their difficulties. Participants acknowledged the tendency to underestimate alcohol or cigarette consumption and thought that similar behaviour would apply to questions about memory. Concerns were also raised about the ability of people with memory problems to recognise their own difficulties. In light of these concerns, there was a general preference for 'objective' tests (i.e. genetic or blood tests - which are not currently available) which did not rely on self-reported information.

### Ethical considerations

Participants identified a number of ethical issues relating to proactive approaches. Some felt that seeking consent prior to proactive approaches was essential to enable patients to make informed decisions and prevent distress. Participants felt that time and support was needed to ensure that patients fully understood the purpose, potential outcomes and implications of tests and did not simply comply with any questions asked by their GP. Particular concerns were raised about the case finding approach and how this would be integrated into routine consultations (Box 4).

Participants stressed the importance of providing appropriate support services (particularly for people with no close family and limited social networks) prior to introducing proactive approaches. One person with experience of genetic screening highlighted the need for emotional support during the process. A final ethical issue raised during the task groups was the possibility of increasing stigma towards individuals who developed dementia (regardless of whether or not they had taken steps to

1  
2  
3 reduce the risk of developing the disease). This was particularly evident during some task groups in  
4 which participants spoke pejoratively about individuals who were perceived not to respond  
5 'appropriately' to risk information.  
6  
7

## 8 9 **Alternatives to proactive approaches**

10 In addition to discussing integration of proactive approaches in primary care, participants suggested  
11 introducing approaches to target behaviour change at a population level including increasing  
12 awareness of dementia and health promotion or policy initiatives to address risk factors.  
13

### 14 **Raising awareness of dementia across the life course**

15 Increasing awareness of dementia was seen as key to: reducing stigma; improving integration of  
16 people with dementia; and encouraging people to seek help at an earlier stage. Although awareness  
17 raising was discussed in all but one of the task groups, the emphasis varied markedly between  
18 groups. Awareness raising was generally seen as relevant to the entire population. Existing UK  
19 initiatives such as Dementia Friends<sup>25</sup> and the Prime Minister's Challenge<sup>26</sup> were viewed positively  
20 (Box 5).  
21  
22

23 Initiatives to raise dementia awareness among specific groups including older people and children  
24 were discussed by some groups. Some participants felt that including children was essential to effect  
25 a societal change, others argued against targeting younger generations either to avoid burdening  
26 them with information about dementia or because of perceptions that they were less likely to  
27 engage with an illness strongly related to older age.  
28  
29

30 Having accessible information presented by a credible source was key to awareness raising. One  
31 participant emphasised the importance of avoiding 'medical jargon' and presenting information that  
32 people could relate to. A range of existing opportunities for disseminating information were  
33 suggested including information in GP surgeries, community centres and patient participation  
34 groups.  
35  
36

### 37 **Health promotion: policy and practice initiatives**

38 A number of aspects of health promotion were discussed by participants including the extent to  
39 which dementia-specific advice was needed and the most appropriate age group to target. There  
40 was a general consensus that health promotion should not focus specifically on dementia, but  
41 prioritise a healthy lifestyle. As with awareness raising, views differed over whether health  
42 promotion campaigns should target children and the role of schools in promoting a healthy lifestyle  
43 (Box 5).  
44  
45

46 Support at a government level was clearly relevant to both awareness raising and health promotion.  
47 However, concerns over the lack of reach of these types of initiatives, led some participants to  
48 suggest that policy changes might be more effective. Taxing certain foods or enforcing limits on the  
49 food industry were most frequently suggested as ways of 'enforcing' a healthier lifestyle. While the  
50 former was welcomed by some, others were concerned about the potential loss of individual  
51 freedom. Concerns were expressed about frequently changing advice on healthy diet and lifestyle  
52 since this created uncertainties over how to act on such information and potentially undermined the  
53 potential value of both health promotion and providing risk information.  
54  
55  
56  
57  
58  
59  
60

## DISCUSSION

Although presentations were embedded within each task group to introduce dementia case finding, dementia risk assessment and genetic screening, these were insufficient to ensure that participants fully understood the key concepts. They were, however, able to comment on the general principles underlying earlier diagnosis and risk assessment for dementia. Earlier diagnosis was generally welcomed by all participants but views varied regarding risk assessment and genetic screening prior to the emergence of symptoms. There was a preference to embed risk assessment within routine health checks, which focused on achieving a healthier lifestyle, rather focusing specifically on dementia. Participants felt that such health checks should be more widely available and provided by a range of health professionals, including nurses. They also emphasised the need to explore preferences and ensure individuals understand what is involved prior to introducing proactive approaches into routine practice. The confusion evident during the task groups confirms the importance of providing accessible information to enable people to make informed decisions. While participants expressed a strong preference for objective measures rather than those relying on self-reported behaviour, this is at odds with the types of risk assessment tools currently available. Although participants also spoke positively about the need for population approaches to promoting healthy lifestyles, some recognised the potential for negative consequences for individuals who did not adopt recommended lifestyle changes.

In terms of earlier diagnosis of dementia, our findings echo those of a systematic review which found that both people with and without cognitive impairment wanted to know sooner, rather than later, if they had dementia in order to better prepare for their future<sup>27</sup>. In terms of identifying those at higher risk of developing dementia, it is interesting to note our participants' preference for such approaches to be part of an integrated, holistic approach to maintaining health in mid/late life rather than dementia specific initiatives. Such results lend support to current research evaluating holistic health and wellbeing risk appraisal tools.<sup>28</sup> Earlier qualitative research exploring public knowledge of dementia risk factors and views on risk reduction approaches found reasonably good knowledge of factors which contribute to healthy ageing.<sup>19</sup> Interestingly fear of developing dementia, and the need to improve public knowledge about dementia, were considered major motivators amongst participants towards adopting a healthier lifestyle and improved health behaviours.<sup>19</sup>

This study explored the perceptions of members of the public, none of whom had dementia. The focus was therefore on case finding, risk assessment/reduction and genetic screening as abstract concepts; participants' views may differ when facing such activities at a personal level. The limited public understanding of dementia<sup>29</sup> was confirmed in the present study. This suggests that future studies may need to consider either focusing on a single proactive approach (e.g. genetic screening) to avoid introducing multiple concepts, or that data collection may need to be conducted over a longer period to enable participants to become familiar with the concepts and facilitate informed discussions, for example through citizens' juries.<sup>30</sup> Due to personnel changes, data analysis was conducted by researchers who had no previous involvement in the project. However, as the researchers were more distant from the data, this facilitated a more critical stance and the identification of underlying themes indirectly linked with the study objective.

1  
2  
3 Recent data on the changing incidence and prevalence of dementia internationally<sup>4</sup> has generated  
4 research interest in prevention through controlling risk factors at both individual and population  
5 levels.<sup>31</sup> Whilst interim findings from a randomised controlled trial of a complex, multicomponent  
6 intervention (diet, physical exercise, brain training, vascular risk reduction) targeting individual  
7 dementia risk have revealed promising results,<sup>32</sup> the search for feasible and valid risk assessment  
8 'tools' to identify those who would benefit most from such interventions is ongoing.<sup>15</sup> There has  
9 however been little exploration of the acceptability of such approaches to patients and the public<sup>19</sup>  
10 especially in dementia where public understanding of the illness is still low.<sup>29</sup> With electronic  
11 vascular disease risk assessment tools such as Q-RISK2, which allow healthcare professionals to  
12 quickly calculate an individual's future risk,<sup>33 34</sup> now embedded in routine primary care practice,  
13 similar methods have been used to develop a dementia risk tool.<sup>16</sup> The validity of this tool is  
14 currently under study, it will however be equally important to also explore its acceptability to  
15 patients and healthcare professionals, especially if considering the possibility of patient self-  
16 administered tools in the future.<sup>35</sup> In terms of the implications for practice, our study shows that the  
17 introduction of proactive approaches to dementia identification should also be accompanied by  
18 better quality information about dementia (and the likelihood of developing dementia) and  
19 psychological support for those undergoing risk assessment as well as addressing important public  
20 concerns about the quality and availability of current dementia care.

21  
22  
23  
24  
25  
26 As international policy shifts from finding a 'cure' for dementia to focus on more efficient ways of  
27 future care provision, including reducing numbers with dementia, research opportunities are  
28 beginning to address the prevention as well as 'cure and care' agenda.<sup>31 36</sup> Accurate identification of  
29 an individual's risk of developing dementia, in order to identify those who can most benefit from  
30 appropriate intervention, will be one part of this new agenda; any future research must however  
31 also explore the ethical and personal concerns associated with any newly developed approaches to  
32 determining an individual's future risk of developing dementia. Whilst the usefulness and efficiency  
33 of general lifestyle checks have been questioned,<sup>37</sup> these may be a more acceptable way of  
34 translating dementia risk reduction approaches into usual care. The considerable confusion amongst  
35 our participants around approaches to earlier identification of both people with possible dementia  
36 and those at higher risk of developing the illness in the future suggests an urgent need for greater  
37 education focused on dementia risk and individual risk reduction.

38  
39  
40  
41  
42  
43 **Funding:** This paper presents independent research funded by the National Institute for Health  
44 Research School for Primary Care Research (NIHR SPCR), project number 261. Louise Robinson is  
45 funded by a National Institute for Health Research Professorship (NIHR-RP-011-043). The views  
46 expressed are those of the author(s) and not necessarily those of the NIHR, the National Health  
47 Service or the Department of Health.

48  
49  
50 **Contributor statement:** LR conceived the study and obtained project funding. CD and LN carried out  
51 data collection; CB, EM and LP were responsible for data analysis. All authors contributed to drafting  
52 of the paper and approved the final manuscript.

53  
54 **Copyright:** The Corresponding Author has the right to grant on behalf of all authors and does grant  
55 on behalf of all authors, [a worldwide licence](#) to the Publishers and its licensees in perpetuity, in all  
56 forms, formats and media (whether known now or created in the future), to i) publish, reproduce,  
57

1  
2  
3 distribute, display and store the Contribution, ii) translate the Contribution into other languages,  
4 create adaptations, reprints, include within collections and create summaries, extracts and/or,  
5 abstracts of the Contribution, iii) create any other derivative work(s) based on the Contribution, iv)  
6 to exploit all subsidiary rights in the Contribution, v) the inclusion of electronic links from the  
7 Contribution to third party material where-ever it may be located; and, vi) licence any third party to  
8 do any or all of the above.  
9

10  
11 **Competing interest statement:** All authors have completed the Unified Competing Interest form and  
12 declared any relevant support from any organisation for the submitted work in the previous three  
13 years. Professor Robinson reports grants from the National Institute of Health Research  
14 Professorship scheme during the conduct of the study.  
15

16  
17 **Transparency declaration:** LR affirms that the manuscript is an honest, accurate, and transparent  
18 account of the study being reported; that no important aspects of the study have been omitted; and  
19 that any discrepancies from the study as planned (and, if relevant, registered) have been explained.  
20

21  
22 **Patient involvement:** The theme of this research was one of the key research priorities identified by  
23 the NIHR Dementia and Neurodegenerative Diseases research network (DeNDRoN) Primary Care  
24 Clinical Study Group (PCCSG), an integrated patient, public and researcher group of their last priority  
25 setting exercise. Members of this group helped refine the research proposal prior to submission to  
26 NIHR.  
27

28  
29 **Data sharing statement:** No additional data is available.  
30

## 31 REFERENCES

- 32  
33 1. Alzheimer's Disease International. World Alzheimer Report 2015: The Global Impact of Dementia:  
34 an Analysis of Prevalence, Incidence, Cost and Trends. London: Alzheimer's Disease  
35 International, 2015.
- 36 2. Wu YT, Fratiglioni L, Matthews FE, et al. Dementia in western Europe: epidemiological evidence  
37 and implications for policy making. *Lancet Neurol* 2016;15 doi: 10.1016/s1474-  
38 4422(15)00092-7
- 39 3. Larson EB, Langa KM. What's the "take home" from research on dementia trends? *PLoS One*  
40 2017;14(3):e1002236. doi: 10.1371/journal.pmed.1002236
- 41 4. Prince M, Ali GC, Guerchet M, et al. Recent global trends in the prevalence and incidence of  
42 dementia, and survival with dementia. *Alzheimers Res Ther* 2016;8(1):23. doi: 10.  
43 1186/s13195-016-0188-8
- 44 5. Matthews FE, Arthur A, Barnes LE, et al. A two-decade comparison of prevalence of dementia in  
45 individuals aged 65 years and older from three geographical areas of England: results of the  
46 Cognitive Function and Ageing Study I and II. *Lancet* 2013;382(9902):1405-12.
- 47 6. Matthews FE, Stephan BCM, Robinson L, et al. A two decade dementia incidence comparison from  
48 the Cognitive Function and Ageing Studies I and II. *Nat Commun* 2016;7 doi:  
49 10.1038/ncomms11398
- 50 7. Alzheimer's Disease International. World Alzheimer Report 2014: Dementia and Risk Redution.  
51 London: Alzheimer's Disease International 2014.
- 52 8. Department of Health. Prime Minister's challenge on dementia 2020. London, 2015.
- 53 9. UK National Screening Committee. The UK NSC recommendation on screening for dementia. Jan  
54 2015 2015 [Available from: [www.screening.nhs.uk/dementia](http://www.screening.nhs.uk/dementia) accessed 26/06/2017].  
55  
56  
57  
58  
59  
60

10. World Health Organization. Draft global action plan on the public health response to dementia 2016 [Available from: [http://www.who.int/mental\\_health/neurology/dementia/action\\_plan\\_consultation/en/](http://www.who.int/mental_health/neurology/dementia/action_plan_consultation/en/) accessed 12 July 2017.
11. Wald N, Morris J. What is case-finding? *Journal of Medical Screening* 1996;3(1):1.
12. McCartney M. "Case finding" in dementia is simply screening with no evidence of benefit. *BMJ* 2014;349:g4791.
13. NHS England. Commissioning for quality and innovation (CQUIN) 2014/15 guidance 2014 [Available from: <https://www.england.nhs.uk/wp-content/uploads/2014/12/sc-cquin-guid.pdf>; accessed 28 May 2017.
14. NHS England. Enhanced Service Specification: Facilitating timely diagnosis and support for people with dementia 2015/16 2015 [Available from: <https://www.england.nhs.uk/commissioning/wp-content/uploads/sites/12/2015/03/facilitate-timly-diag-dementia.pdf> accessed 28 May 2017.
15. Tang EYH, Harrison S, Errington L, et al. Current developments in dementia risk prediction modelling: An updated systematic review. *PLoS One* 2015;10(9):e0136181.
16. Walters K, Haroon S, Peterson I, et al. Predicting dementia risk in primary care: development and validation of the Dementia Risk Score using routinely collected data. *BMC Med* 2016;14(6) doi: 10.1186/s12916-016-0549-y
17. Kivipelto M, Ngandu T, Laatikainen T, et al. Risk score for the prediction of dementia risk in 20 years among middle aged people: a longitudinal, population-based study. *Lancet Neurol* 2006;5 doi: 10.1016/s1474-4422(06)70537-3
18. Barnes DE, Covinsky KE, Whitmer RA, et al. Dementia risk indices: A framework for identifying individuals with a high dementia risk. *Alzheimers Dement* 2010;6(2):138-41.
19. Kim S, Sargent-Cox KA, Anstey KJ. A qualitative study of older and middle-aged adults' perception and attitudes towards dementia and dementia risk reduction. *J Adv Nurs* 2015;71(7):1694-703. doi: 10.1111/jan.12641 [published Online First: 2015/02/24]
20. Martin S, Kelly S, Khan A, et al. Attitudes and preferences towards screening for dementia: a systematic review of the literature. *BMC Geriatr* 2015;15(1):66.
21. Hersch J, Jansen J, Barratt A, et al. Women's views on overdiagnosis in breast cancer screening: a qualitative study. *Brit Med J* 2013;346 doi: 10.1136/bmj.f158
22. Mair F, May C, Murray E, et al. Understanding the implementation and integration of E-Health services. London: NIHR, 2010.
23. Tong A, Sainsbury P, Craig J. Consolidated criteria for reporting qualitative research (COREQ): a 32-item checklist for interviews and focus groups. *Int J Qual Health Care* 2007;19(6):349-57.
24. Braun V, Clarke V. Using thematic analysis in psychology. *Qual Res Psychol* 2006;3(2):77-101.
25. Alzheimer's Society. Dementia Friends [Available from: <https://www.dementiafriends.org.uk/> accessed 26/06/2017.
26. Department of Health. Prime Minister's Challenge on Dementia 2020. London, UK: Department of Health 2015.
27. Van den Dungen P, van Kuijk L, van der Wouden J, et al. Preferences regarding disclosure of a diagnosis of dementia: a systematic review. *International Psychogeriatrics* 2014;26(10):1603-18. doi: 10.1017/S1041610214000969
28. Walters K, Kharicha K, Goodman C, et al. Promoting independence, health and wellbeing for older people: a feasibility study of computer-aided health and social risk appraisal system in primary care. *BMC Fam Pract* 2017;18(47) doi: 10.1186/s12875-017-0620-6
29. Mitchell S, Ridley SH, Sancho RM, et al. The future of dementia risk reduction research: barriers and solutions. *J Public Health* 2016:1-7. doi: 10.1093/pubmed/fdw103
30. Lenaghan Jo CA. Citizens' Juries: Theory into Practice. London: Institute for Public Policy Research 1997.

- 1  
2  
3 31. Anstey KK, Eramudugolla R, Hosking DE, et al. Bridging the translation gap: from dementia risk  
4 assessment to advice on risk reduction. *J Prev Alzheimers Dis* 2015;2(3):189-98.  
5 32. Ngandu T, Lehtisalo J, Solomon A, et al. A 2 year multidomain intervention of diet, exercise,  
6 cognitive training, and vascular risk monitoring versus control to prevent cognitive decline in  
7 at-risk elderly people (FINGER): a randomised controlled trial. *Lancet*;385(9984):2255-63. doi:  
8 10.1016/S0140-6736(15)60461-5  
9 33. Hippisley-Cox J, Coupland C, Vinogradova Y, et al. Predicting cardiovascular risk in England and  
10 Wales: prospective derivation and validation of QRISK2. *BMJ* 2008;336(7659):1475-82. doi:  
11 10.1136/bmj.39609.449676.25  
12 34. Hippisley-Cox J, Coupland C, Vinogradova Y, et al. Performance of the QRISK cardiovascular risk  
13 prediction algorithm in an independent UK sample of patients from general practice: A  
14 validation study. *Heart* 2008;94(1):34-9. doi: 10.1136/hrt.2007.134890  
15 35. Nolan T, Dack C, Pal K, et al. Patient reactions to a web-based cardiovascular risk calculator in  
16 type 2 diabetes: a qualitative study in primary care. *Br J Gen Pract* 2015;65(632):e152-60. doi:  
17 10.3399/bjgp15X683953  
18 36. Birdi R, Stephan BC, Robinson L, et al. Can we influence the epidemiology of dementia?  
19 Perspectives from population-based studies. *Postgrad Med J* 2015;91(1081):651-4. doi:  
20 10.1136/postgradmedj-2015-133244  
21 37. Frost H, Haw S, Frank J. Promoting health and well-being in later life: interventions in primary  
22 care and community settings. Edinburgh: Chief Scientist Office, 2011.  
23  
24  
25  
26  
27  
28  
29  
30  
31  
32  
33  
34  
35  
36  
37  
38  
39  
40  
41  
42  
43  
44  
45  
46  
47  
48  
49  
50  
51  
52  
53  
54  
55  
56  
57  
58  
59  
60

Table 1- Overview of themes and subthemes

|                                                                                                                                                                                                                                                                                |
|--------------------------------------------------------------------------------------------------------------------------------------------------------------------------------------------------------------------------------------------------------------------------------|
| Confusion around dementia and proactive approaches <ul style="list-style-type: none"> <li>• Limited understandings of dementia</li> <li>• Making sense of proactive approaches</li> </ul>                                                                                      |
| Views on proactive approaches to dementia <ul style="list-style-type: none"> <li>• Perceived benefits and limitations of proactive approaches</li> <li>• Psychological consequences of proactive approaches</li> </ul>                                                         |
| Practical issues in enacting proactive approaches to dementia <ul style="list-style-type: none"> <li>• Existing and potential new opportunities for implementation</li> <li>• Barriers to implementation of proactive approaches'</li> <li>• Ethical considerations</li> </ul> |
| Alternatives to proactive approaches to dementia <ul style="list-style-type: none"> <li>• Raising awareness of dementia across the life course</li> <li>• Health promotion: policy and practice initiatives</li> </ul>                                                         |



## Box 1 Task group format

1. Pre task group questionnaire (participant demographic details; personal experience of dementia; knowledge about dementia risk factors)
2. Presentation 1
  - Introduction to dementia and the process of diagnostic assessment
  - Case finding in high risk groups
3. Group discussion 1
4. Presentation 2
  - Risk assessment and risk assessment tools
  - Genetic screening
5. Group discussion 2
6. Post task group questionnaire (knowledge about dementia risk factors)

## Box 2 Confusion around dementia and proactive approaches

**Limited understandings of dementia**

'Now I don't know to what degree you suffer Alzheimer's, can you get milder cases, more severe cases? Do people just amble along with mild cases of dementia?' [FG3, P17, female]

'Then you say 'dementia', what do you mean? I know that's stupid but my partner's got mild cognitive impairment which could be classified as dementia, because he's got memory problems, or it might be mild cognitive impairment, which is it?' [FG2, P5, female]

'Dementia as far as I'm aware, dementia is one form of Alzheimer's disease' [FG2, P6, male]

'I think language is very powerful. You know, when I was younger, people who had memory problems, do you know, they were a bit wandered you know, they were just getting a bit worn out, you know. The language was kind, but, you talk about dementia, dementia, demented, crazy, and that, that, that encourages people to flee from it, to conceal it and not to share it-' [FG2, P10, male]

**Making sense of proactive approaches**

'Does it not smack a bit of Big Brother if you're having a register? 'This person is going to get dementia. This person is going to get dementia. This person isn't.' It smacks of Big Brother sort of...' [FG5, P24, male]

'I don't really know what genetic testing amounts to. It was mooted to me once because I've got an eye condition and it might be genetic, that it was possible to have that done. I was advised that it's quite a big process to go through and it might not give you anything clear at the end of the day. '[FG6, P31, male]

'I mean you really can't prove that if you're like say - do more exercise, change your diet and all that, will it stop you getting that?' [FG3, P14, male]

'And then it [health check] came back with a letter, with a big long 'score this for this, and this for that' but it didn't explain what those numbers meant.' [FG1. P4, female]

## Box 3 Views on proactive approaches

**General views on proactive approaches**

'I don't want to know that I might be going to get it. I don't mind being told that, "If you do this, this and this you're less likely to have it", just as with heart disease or anything like that.' [FG3, P11, female]

'But perhaps you need different ways, different tools, because what we seem to be saying is that different things suit different people.' [FG2, P9, female]

**Perceived benefits and limitations of proactive approaches**

'But I think the point here is if you've got high cholesterol there's a blood test that shows that and the doctor can do something about it. If you're going to develop dementia it's no good telling me unless you can cure it, I can do something myself about it or you can help me.' [FG3, P16, male]

'If there's medication which can slow it down, delay it or whatever and I could have that medication I would be silly to not have it.' [FG5, P27, female]

'...with dementia, I think I would like to know so I could get my life ironed out for my kids, because I wouldn't like to leave them in dire straits.' [FG4, P22, female]

'I think an early diagnosis might be quite frightening at the time but I think it's only fair on your family so that they know what's happening for you and for them to prepare themselves as well for what might happen, if they would be prepared to look after you or if they feel you might need to go into care' [FG3, P17, female]

'The majority of people will say, "It will never happen to me anyway. I don't need that test. I only smoke 20 fags a day and my neighbour smokes 30 so he's far more likely to..." [FG3, P16, male]

'You can choose to ignore it, but you've been given the information and it's your choice what you do with it, whereas at the minute, it's not there.' [FG6, P30, female]

**Psychological consequences of proactive approaches**

'But there was no sign of it [dementia] in my brain at all. Now I think that was fantastic. I now know that there was no sign of it and that's really, really reassuring.' [FG5, P23, female]

'Do I really want to have the worry about me? It may happen. If I had symptoms of it, then like yourself I would go and probably find out. But I don't feel like I've got symptoms of it, so I don't really want to know that I could have it when I haven't got it, when I feel...' [FG5, P28, female]

'I think there are a percentage of people who wouldn't want to know because they're so scared of the diagnosis because they've seen what happens to people. They've seen relatives go into nursing homes and the eventual outcome.' [FG6, P29, female]

'I did some of these cognitive tests on the internet and I got myself really upset and stressed when I thought I wasn't hitting the time allowed. I dropped out of that because I felt under pressure.' [FG3, P17, female]

**Box 4 Existing and potential new opportunities for implementation****Existing and potential new opportunities for implementation**

'My doctors have started to do an annual review of people, so on their birthday they call you in, you go and see the practice nurse and they give you an MOT certificate, basically. So it could be at that point that if memory things were introduced to that kind of review... That's just a standard thing so everybody understands that they're going to go through that test, or whatever, then I think incorporating in that could help.' [FG3, P11, female]

'So you could have that health check on all those things, the blood pressure and if that regardless of age, so you don't have to hit the 60 box, if that health check put you in those risk factors then there's follow-up and questions asked about memory' [FG4, P20, female]

'You can go into your doctor's surgery and you don't necessarily have to see a doctor now do you? No, you're seeing a practice nurse. It could be at that level that the tests are done and the risks are quoted to you. Then if you felt that you needed to see a doctor to explain it more or to give you better information...' [FG3, P16, male]

'I think rather than saying, "Oh, go to the GPs." I haven't been there for three years and I don't need to go there now. Things popping up, but things more widespread across the community so that people will come across them more frequently. In what shape or form, I suppose that's debateable' [FG6, P31, male]

**Barriers to implementing proactive approaches**

'It's getting appointments to see them, that's the problem. From personal experience, trying to get to see a GP, you just give up.' [FG6, P31, male]

'They're too busy. You know, you don't get enough time to do anything like that in my GP's surgery. You never, ever get it, because you don't get enough minutes' appointment.' [FG1, P4, female]

'There's none of the continuity like when you were smaller; we had a family doctor who was there for everybody's health for 50 years.' [FG5, P27, female]

'I do tend to try and- well, I do think I tell the truth in these questionnaires. But you may think, you've got a different idea, perhaps, than somebody else. You might under-exaggerate, or over-exaggerate. You think you're telling the truth, but actually...' [FG1, P1, female]

'People with dementia, in the early stages, will hide the fact that they've got a problem and can sometimes fool quite a lot of people a lot of the time.' [FG3, P11, female]

'It also requires people to have insight into their memory problem and often people just haven't, have they?' [FG2, P9, female]

**Ethical considerations**

'As long as it's an informed consent, but, I think, often [patients] will go with what the GP says because they trust their GP so it's a big responsibility.' [FG2, P5, female]

'You're going to get a lot of people who will go to the GP for a completely different reason and the GP might turn round and say, "Do you think you have a memory problem?" You think, "Well, I've come about my in-growing toenail. No, I don't. I'm not here about that."' [FG6, P29, female]

'I think you would need counselling [...] yes, but then the whole thing and then it hits you on an

1  
2  
3 emotional level and that's what you need help.' [FG2, P8, female]  
4

5 'If you are going to put yourself forward to identify your risk of dementia, then you want to know what  
6 will happen if you are at high risk of dementia. What services are out there, what's the support,  
7 available and if there's nothing available for you, you might think, "Well, what's the point of knowing."  
8 [FG2, P9, female]  
9

10 'There's always going to be a percentage of the population, it's whether it's to do with health, whether  
11 it's to do with whatever, who just don't give a s\*\*\*. But also - but that impacts upon us, because  
12 eventually we're going to have to pay for the people who don't give a s\*\*\*. [FG4, P20, female]'  
13  
14  
15  
16  
17  
18  
19  
20  
21  
22  
23  
24  
25  
26  
27  
28  
29  
30  
31  
32  
33  
34  
35  
36  
37  
38  
39  
40  
41  
42  
43  
44  
45  
46  
47  
48  
49  
50  
51  
52  
53  
54  
55  
56  
57  
58  
59  
60

## Box 5 Alternatives to proactive approaches

**Raising awareness of dementia across the life course**

'I mean, the dementia friends thing [...] if you can get everybody, you can get kids at school to understand how they can best talk to Granny, how they can react to somebody in the street who is wandering or who's talking to themselves, how to be nice to the person, how to support them.'  
[FG2, P7, female]

'I think acceptance of it, even it was part of primary/secondary, actually getting it in the schools and getting it at that young age to understand that they're not that person. It's just part of a condition they've got, and acceptance.' [FG6, P30, female]

'Having taught in an FE college and taught health and social care subjects, 16 to 19 year olds think they're going to live forever. When you try to talk to them about smoking and drinking, it's just over the top of their head. I don't know. Even if they've had experience of grandparents with dementia they think, "It's never going to happen to me and I'm going to live forever and who cares what happens to me when I get to 65?"' [FG6, P29, female]

**Health promotion: policy and practice initiatives**

'There's a general advice there that's not specific to dementia [...] there's a generic thing going on about 'well if you want to keep your heart going, you need to give up smoking'. It's the same things. So maybe we need to actually pull dementia or the risks of dementia into that general health and wellbeing better than perhaps we're currently doing.' [FG4, P19, male]

'The schools have enough on their plate with directives coming to say, "You must teach X amount of maths, English and science" and that's push, push, push. They don't leave a lot of time. They've taken less PE. So schools don't have that facility' [FG3, P12, female]

'Not everybody is going to get that education, not everybody is going to listen to that education. And there's parental influence on it, social influence on it, economic influence on it. So I think you've got sort of - I believe very strongly in personal choice, but I think there's a point where you've got to look at it more on a sort of society level.' [FG4, P18, male]

With healthy eating, at least now they're going to put this sugar tax on, but I would put tax on a load of other things like that. [FG3, P14, male]

'The trouble is with these diets, again, you get it in the papers, "Don't drink tea, because it's got this... Don't drink coffee because it's got that." And then a few months down the line, "Oh, tea's good for you. Coffee is good for you." What do you believe?' [FG4, P22, female]

**COREC checklist**

**Domain 1: Research team and reflexivity**

| Personal Characteristics |                                                                                 |                                                                                                                                                                                                                                                                                                                                                                                                                                                                      |
|--------------------------|---------------------------------------------------------------------------------|----------------------------------------------------------------------------------------------------------------------------------------------------------------------------------------------------------------------------------------------------------------------------------------------------------------------------------------------------------------------------------------------------------------------------------------------------------------------|
| 1.                       | Interviewer/facilitator<br>Which author/s were involved in data collection?     | CD & LN (all task groups); LR (pilot task group only)                                                                                                                                                                                                                                                                                                                                                                                                                |
| 2.                       | Credentials<br>What were the researcher’s credentials? E.g. PhD, MD             | CB - MSc<br>CD – PhD<br>EM – PhD<br>LN – MclinRes<br>LP -<br>LR – MD, FRCGP                                                                                                                                                                                                                                                                                                                                                                                          |
| 3.                       | Occupation<br>What was their occupation at the time of the study?               | CB - senior research associate<br>CD - research associate<br>EM - research associate<br>LN - NIHR Academic Clinical Fellow<br>LP - research assistant<br>LR - Professor of Primary Care and Ageing                                                                                                                                                                                                                                                                   |
| 4.                       | Gender<br>Was the researcher male or female?                                    | All researchers were female                                                                                                                                                                                                                                                                                                                                                                                                                                          |
| 5.                       | Experience and training<br>What experience or training did the researcher have? | All researchers involved in data collection completed GCP training.<br>CB and CD are experienced qualitative researchers with extensive experience in dementia research.<br>LN is a general practitioner and undertook this study whilst studying for a Masters’ degree which included training in qualitative methods.<br>EM is a health psychologist with previous qualitative experience gained during her PhD.<br>LP is an adult nurse with research experience. |

|                                       |                                                                                                                                                                          |                                                                                                                                                                |
|---------------------------------------|--------------------------------------------------------------------------------------------------------------------------------------------------------------------------|----------------------------------------------------------------------------------------------------------------------------------------------------------------|
|                                       |                                                                                                                                                                          | LR is an experienced dementia researcher and general practitioner                                                                                              |
| <b>Relationship with participants</b> |                                                                                                                                                                          |                                                                                                                                                                |
| 6.                                    | Relationship established<br>Was a relationship established prior to study commencement?                                                                                  | Participants in the pilot task group were known to the researchers as work colleagues; there was no prior relationship with participants in other task groups. |
| 7.                                    | Participant knowledge of the interviewer<br>What did the participants know about the researcher? e.g. personal goals, reasons for doing the research                     | Researchers discussed their interest in exploring views on case finding, risk assessment and genetic screening in dementia.                                    |
| 8.                                    | Interviewer characteristics<br>What characteristics were reported about the interviewer/facilitator? e.g. Bias, assumptions, reasons and interests in the research topic | None                                                                                                                                                           |

## Domain 2: study design

|                              |                                                                                                                                                                                                   |                                                                            |
|------------------------------|---------------------------------------------------------------------------------------------------------------------------------------------------------------------------------------------------|----------------------------------------------------------------------------|
| <b>Theoretical framework</b> |                                                                                                                                                                                                   |                                                                            |
| 9.                           | Methodological orientation and theory<br>What methodological orientation was stated to underpin the study? e.g. grounded theory, discourse analysis, ethnography, phenomenology, content analysis | Interpretive approach and thematic analysis                                |
| <b>Participant selection</b> |                                                                                                                                                                                                   |                                                                            |
| 10.                          | Sampling<br>How were participants selected? e.g. purposive, convenience, consecutive, snowball                                                                                                    | Convenience                                                                |
| 11.                          | Method of approach<br>How were participants approached? e.g. face-to-face, telephone, mail, email                                                                                                 | Face to face & poster inviting participation (Age UK); mail (Voice North). |
| 12.                          | Sample size<br>How many participants were in the study?                                                                                                                                           | 31                                                                         |



|                 |                                                                                                            |                                                                                                                                                                  |
|-----------------|------------------------------------------------------------------------------------------------------------|------------------------------------------------------------------------------------------------------------------------------------------------------------------|
| 13.             | Non-participation<br>How many people refused to participate or dropped out? Reasons?                       | 23 people were approached and either were not interested or did not attend the focus group. No information on reasons for non-participation is available.        |
| Setting         |                                                                                                            |                                                                                                                                                                  |
| 14.             | Setting of data collection<br>Where were the data collected? e.g. home, clinic, workplace                  | University (5 task groups); carers' centre (1 task group)                                                                                                        |
| 15.             | Presence of non-participants<br>Was anyone else present besides the participants and researchers?          | No. One task group was facilitated by three team members (CD, LN, LR); the remaining groups were facilitated by CD and LN.                                       |
| 16.             | Description of sample<br>What are the important characteristics of the sample? e.g. demographic data, date | Important characteristics for participants were gender, age and experience of dementia.                                                                          |
| Data collection |                                                                                                            |                                                                                                                                                                  |
| 17.             | Interview guide<br>Were questions, prompts, guides provided by the authors? Was it pilot tested?           | A structured powerpoint presentation was given by the facilitators to each task group and specific prompts for discussion were included within the presentation. |
| 18.             | Repeat interviews<br>Were repeat interviews carried out? If yes, how many?                                 | No                                                                                                                                                               |
| 19.             | Audio/visual recording<br>Did the research use audio or visual recording to collect the data?              | Yes, audio recording and full transcription                                                                                                                      |
| 20.             | Field notes<br>Were field notes made during and/or after the interview or focus group?                     | Yes                                                                                                                                                              |
| 21.             | Duration<br>What was the duration of the interviews or focus group?                                        | The duration of the task groups ranged from 51 to 120 minutes with a median of 105 minutes (mean 95 minutes)                                                     |
| 22.             | Data saturation<br>Was data saturation discussed?                                                          | Yes, during our on-going analysis.                                                                                                                               |
| 23.             | Transcripts returned                                                                                       |                                                                                                                                                                  |

|                                                                          |    |
|--------------------------------------------------------------------------|----|
| Were transcripts returned to participants for comment and/or correction? | No |
|--------------------------------------------------------------------------|----|

### Domain 3: analysis and findings

| Data analysis |                                                                                                                                                           |                                                                                |
|---------------|-----------------------------------------------------------------------------------------------------------------------------------------------------------|--------------------------------------------------------------------------------|
| 24.           | Number of data coders<br>How many data coders coded the data?                                                                                             | CB, EM & LP were involved in developing the coding frame.<br>EM coded the data |
| 25.           | Description of the coding tree<br>Did authors provide a description of the coding tree?                                                                   | Yes                                                                            |
| 26.           | Derivation of themes<br>Were themes identified in advance or derived from the data?                                                                       | Derived from the data                                                          |
| 27.           | Software<br>What software, if applicable, was used to manage the data?                                                                                    | NVivo 11                                                                       |
| 28.           | Participant checking<br>Did participants provide feedback on the findings?                                                                                | No                                                                             |
| Reporting     |                                                                                                                                                           |                                                                                |
| 29.           | Quotations presented<br>Were participant quotations presented to illustrate the themes / findings? Was each quotation identified? e.g. participant number | Yes                                                                            |
| 30.           | Data and findings consistent<br>Was there consistency between the data presented and the findings?                                                        | Yes                                                                            |
| 31.           | Clarity of major themes<br>Were major themes clearly presented in the findings?                                                                           | Yes                                                                            |
| 32.           | Clarity of minor themes<br>Is there a description of diverse cases or discussion of minor themes?                                                         | Yes                                                                            |

# BMJ Open

## Proactive approaches to identifying dementia and dementia risk; a qualitative study of public attitudes and preferences

|                                 |                                                                                                                                                                                                                                                                                                                                                                                                                                                             |
|---------------------------------|-------------------------------------------------------------------------------------------------------------------------------------------------------------------------------------------------------------------------------------------------------------------------------------------------------------------------------------------------------------------------------------------------------------------------------------------------------------|
| Journal:                        | <i>BMJ Open</i>                                                                                                                                                                                                                                                                                                                                                                                                                                             |
| Manuscript ID                   | bmjopen-2017-018677.R1                                                                                                                                                                                                                                                                                                                                                                                                                                      |
| Article Type:                   | Research                                                                                                                                                                                                                                                                                                                                                                                                                                                    |
| Date Submitted by the Author:   | 03-Nov-2017                                                                                                                                                                                                                                                                                                                                                                                                                                                 |
| Complete List of Authors:       | Robinson, Louise; Institute for Health and Society, Newcastle University<br>Dickinson, Claire; Institute for Health and Society, Newcastle University<br>Magklara, Eleni; Institute for Health and Society, Newcastle University<br>Newton, Lisa; Institute for Health and Society, Newcastle University<br>Prato, Laura; Institute for Health and Society, Newcastle University<br>Bamford, Claire; Institute for Health and Society, Newcastle University |
| <b>Primary Subject Heading</b>: | Mental health                                                                                                                                                                                                                                                                                                                                                                                                                                               |
| Secondary Subject Heading:      | General practice / Family practice, Global health, Public health                                                                                                                                                                                                                                                                                                                                                                                            |
| Keywords:                       | Organisation of health services < HEALTH SERVICES ADMINISTRATION & MANAGEMENT, Risk management < HEALTH SERVICES ADMINISTRATION & MANAGEMENT, Dementia < NEUROLOGY                                                                                                                                                                                                                                                                                          |
|                                 |                                                                                                                                                                                                                                                                                                                                                                                                                                                             |

SCHOLARONE™  
Manuscripts

Peer Review Only

1  
2  
3 **Proactive approaches to identifying dementia and dementia risk; a**  
4 **qualitative study of public attitudes and preferences**  
5  
6  
7  
8

9 Louise Robinson, Claire Dickinson, Eleni Magklara, Lisa Newton, Laura Prato, Claire Bamford.

10  
11 Institute of Health & Society, Newcastle University, Newcastle upon Tyne, UK.  
12

13  
14 Corresponding author and Guarantor for the paper: Louise Robinson, Institute of Health & Society,  
15 Newcastle University, Campus for Ageing and Vitality, Biomedical Research Building, Newcastle upon  
16 Tyne, NE4 5PL.

17 Email: [a.l.robinson@newcastle.ac.uk](mailto:a.l.robinson@newcastle.ac.uk)

18 Telephone: 0191 2082014; Fax: 0191 2081101  
19  
20

21  
22 Keywords: Organisation of health services; Risk management; Dementia  
23

24 Word count: 4000  
25  
26  
27  
28  
29  
30  
31  
32  
33  
34  
35  
36  
37  
38  
39  
40  
41  
42  
43  
44  
45  
46  
47  
48  
49  
50  
51  
52  
53  
54  
55  
56  
57  
58  
59  
60

## ABSTRACT

**Objectives:** The aim of this study was to critically explore the views of the public about the acceptability and feasibility of proactive approaches to earlier dementia diagnosis and also identification of people at high risk of dementia.

**Design:** Qualitative study using task group methodology and thematic data analysis.

**Setting:** Task groups were held either at the University (n=5) or a carers' centre (n=1).

**Participants:** A convenience sample of 31 of 54 participants identified by local non-statutory agencies took part in a task group. All were aged between 40 and 80, 21 women and ten men participated.

**Results:** Despite the use of task group methodology, participants expressed limited understandings of dementia and confusion between proactive approaches. Nevertheless, they highlighted a range of potential benefits and limitations of proactive approaches and the ethical issues raised. There was a preference to embed risk assessment within routine health checks, which focused on achieving a healthier lifestyle, rather than specifically on dementia. Participants emphasised the need to ensure informed consent prior to use of proactive approaches and to provide appropriate support. They also suggested alternative approaches that could potentially facilitate the early detection of dementia or reduce risk at a population level.

**Conclusions:** As international policy on dementia shifts towards a prevention agenda there is growing interest in identifying those at risk of developing dementia. This study provides useful insights into the acceptability of the use of such proactive approaches amongst the public. The introduction of proactive approaches to dementia identification raises complex practical and ethical issues, particularly in the context of low public understanding of dementia. The importance of better quality information about dementia (and the likelihood of developing dementia) and provision of psychological support for those undergoing risk assessment were highlighted.

### Strengths and limitations of this study

- Due to personnel changes, data analysis was conducted by different researchers from those who undertook data collection; this however did facilitate a more critical stance to data interpretation.
- Data collection ceased due to time limitations on the study period; theoretically data collection should have continued until data saturation was achieved.
- Our study explored the perceptions of members of the public, none of whom had dementia; abstract views towards proactive approaches may change if personally facing such assessments.

## INTRODUCTION

Dementia has a huge impact on people living with the illness and their families and incurs substantial healthcare and societal costs.<sup>1</sup> Despite an ageing population, there are considerable inconsistencies in incidence and prevalence trends globally.<sup>2-4</sup> A recent systematic review revealed that in high income countries the incidence and prevalence of dementia may be declining, despite steadily ageing populations, probably due to wide scale health promotion activities; meanwhile in China and parts of Asia, figures are increasing possibly due to worsening cardiovascular risk profiles.<sup>4</sup> Although the evidence base around the medical, social and behavioural factors which influence dementia rates is increasing, this is a complex area.<sup>3</sup> Notwithstanding increasing evidence that dementia prevalence and incidence may be linked to large scale, targeted vascular risk reduction and structured chronic illness care for diseases such as diabetes, in addition to increasing age,<sup>5,6</sup> has led to a shift in global and national policy.<sup>7,8</sup> In the absence of a cure, reducing future dementia burden and costs may be best achieved by greater emphasis on prevention which aims to decrease the future number of people developing the illness.<sup>7</sup> Although general population screening for dementia is not currently advocated,<sup>9</sup> identifying groups at high risk of developing dementia and giving tailored advice to reduce individual risk, has been recommended by the World Health Organisation<sup>10</sup> as a cost effective strategy to reduce the global burden of dementia.<sup>7</sup>

This policy shift has resulted in initiatives such as targeted case finding<sup>11,12</sup> opportunistic assessment to identify possible signs of dementia in a patient at high risk of developing dementia (e.g. those aged 75; older people with high vascular risk, learning disabilities and Parkinson's disease<sup>13,14</sup>) being introduced into clinical practice albeit with little evidence of effectiveness. In addition this has led to a growing research focus on developing feasible and valid risk assessment tools to determine, and quantify, a person's risk of developing dementia, with the aim of identifying those who may best benefit from early intervention.<sup>15</sup> Despite the development of new dementia risk assessment tools,<sup>16-18</sup> there has been limited research evaluating their acceptability to patients, the public and health care professionals.<sup>19</sup> A systematic review of attitudes to population screening for dementia recommended further qualitative research to explore public and healthcare professional attitudes towards proactive approaches to dementia identification in greater depth.<sup>20</sup> Determining the barriers and facilitators to the use of dementia risk tools in routine practice is as important as ascertaining their validity.<sup>16</sup> The aim of this study was to critically explore, using qualitative methods, the views of members of the public about the acceptability and feasibility of proactive approaches to earlier diagnosis and identification of people at high risk of dementia.

## METHODS

We anticipated that levels of knowledge about approaches to earlier identification of dementia and risk assessment among the general public would be low and therefore used task group methodology.<sup>21,22</sup> Data collection in task groups is similar to focus group methodology but includes the presentation of evidence and information about the topic under discussion.

The content and format of the task group are summarized in Box 1. The presentations, developed from recent literature reviews, aimed to provide a summary of evidence-based information in a lay format to facilitate informed discussion. A pilot task group was facilitated by CD, LN and LR with staff from Newcastle University with no specific expertise in dementia and refined prior to the main

1  
2  
3 study. Ethical approval for the project was obtained from Newcastle University. A detailed checklist  
4 of methods using the consolidated criteria for qualitative research (COREQ) guidelines<sup>23</sup> is available  
5 in supplementary file 1.  
6

7 Participants were recruited from two local non-statutory organisations:

- 8 i) Voice North, a forum for patient/public involvement in research based in the North East of England  
9 (<http://www.voicenorth.org/>) and  
10  
11 ii) Age UK, a national voluntary organisation, with local branches, which provides services and  
12 support to older people (<http://www.ageuk.org.uk>).  
13

14 The two organisations used different recruitment approaches: Voice North mailed study information  
15 to their members whilst Age UK advertised the study through posters at meetings of family carers.  
16 Both organisations sought consent from interested participants to pass their contact details to the  
17 research team. Potential participants were sent further study information and then contacted by a  
18 researcher who described the study and answered any questions. Participants were assured that  
19 participation was voluntary and that they could withdraw at any time. Written informed consent  
20 was secured from participants prior to each task group.  
21  
22

### 23 Data collection and analysis

24 A further five task groups, facilitated by CD and LN occurred between December 2015 and July 2016,  
25 each lasting approximately 2 hours. Four were held at Newcastle University and the fifth at an  
26 Age UK carers' group. All task groups, including the pilot, were digitally recorded and transcribed  
27 verbatim; transcripts were checked and anonymised.  
28  
29

30 A thematic approach to analysis was adopted.<sup>24</sup> Initially individual researchers read and re-read one  
31 or two transcripts in detail to become familiar with the data. This stage was particularly important  
32 since changes of personnel meant that the analysis was conducted by different researchers (CB, EM,  
33 LP) to those facilitating the task groups (CD, LN). The researchers noted areas of interest and  
34 potential codes independently and then compared ideas and discussed the data in workshops.  
35  
36

37 Following discussion of emergent themes, we developed separate coding frames for facilitator  
38 presentations and group discussions to avoid imposing ideas from the presentations onto participant  
39 data. These were then applied to further transcripts and discussed collectively in a further data  
40 workshop. Once the coding frames had been agreed, they were applied to all transcripts using Nvivo  
41 11. Output relating to each theme and subtheme was then reviewed and a narrative summary  
42 produced independently (by CB, EM, LP). This was thought to be a more effective way of scrutinising  
43 codes than simply checking coding or having two researchers code the data. The narratives were  
44 then compared and discussed in further data workshops. Finally a combined narrative was produced  
45 for each theme which incorporated the insights and perspectives of different researchers. In a final  
46 stage, each transcript was reread in conjunction with the narrative to identify any missing data or  
47 issues that had not been captured.  
48  
49

50 Quotations indicate the focus group (numbered FG1 to FG6), unique participant identifier and  
51 gender.  
52  
53  
54  
55  
56  
57  
58  
59  
60

## RESULTS

Of the 54 people invited to take part, 31 agreed to participate in a task group; six groups were completed, each with between three and seven participants. The majority of participants were female (n=21, 68%). Around half the sample (n=15, 48%) were aged between 60-69 years; 13 (42%) were between 40-59 years and three (10%) were 70+ years. Eighteen (58 %) knew family members or friends with dementia; a small number had personal experience of proactive approaches to identifying dementia.

Four overarching themes were identified, each of which had several subthemes (Table 1). A key theme related to confusion around dementia and proactive approaches. Other themes related to views on proactive approaches, how these might be enacted in practice and alternative approaches that could potentially facilitate the early detection of dementia or reduce risk at a population level.

### Confusion around dementia and proactive approaches

Throughout the task groups there was evidence of limited understandings of dementia and difficulties in distinguishing between approaches such as case finding in high risk groups, risk assessment and genetic screening. We therefore use the generic term '*proactive approaches*' for all of these activities and only differentiate between them where participants were clearly discussing a specific approach. Examples of confusion are illustrated in Box 2 and described below.

#### Limited understandings of dementia

Participants' understanding of dementia varied, even among those with personal experience of the illness. Uncertainty was expressed about the illness trajectory; boundaries between age-related memory decline, mild cognitive impairment and dementia; and the relationship between dementia and specific subtypes e.g. Alzheimer's disease (Box 2).

All task groups discussed the stigma surrounding dementia which was thought to contribute to the lack of understanding of the condition and a reluctance to be open about symptoms. The fear of dementia was linked to the absence of a cure, potential loss of personhood and devastating effects of advanced dementia which were often conveyed through the language used when talking about people with dementia. Nevertheless many participants felt that societal attitudes towards dementia were improving and drew parallels with other once stigmatising conditions, such as cancer.

#### Making sense of proactive approaches

Discussion around specific proactive approaches – case finding, risk assessment and genetic screening – revealed that participants often confused the different methods, sometimes attributing consequences to one approach which related to another. For example, while risk reduction behaviour could reduce the number of people with dementia, case finding would have no impact on prevalence. This distinction was not, however, understood by participants. Participants also voiced opinions which suggested a lack of understanding of specific methods. For example, one participant seemed to think that the case finding method would result in the clear identification of individuals who were going to develop dementia in the future, rather than on identifying those with known risk factors (Box 2).

The role of genes in dementia similarly seemed to be widely misunderstood by participants. While several participants suggested that genetic screening was the most useful of the proactive approaches, their comments seemed to be based on an implicit assumption that a definitive genetic test is available. Few participants seemed to have understood that a deterministic genetic test is currently only relevant to a small number of individuals with Alzheimer's disease. Although this



1  
2  
3 information was included in the presentation, it did not seem to have been understood by  
4 participants many of whom perceived risk of dementia to be largely determined by their personal  
5 family history. One participant, who had previously discussed genetic screening in relation to  
6 another condition, seemed more aware of the nuanced nature of the information, highlighting the  
7 value of personal experience in understanding the issues.  
8

9 There was a widespread tendency for many participants to see the proactive approaches as  
10 providing more definitive information than is the case. The uncertainties surrounding proactive  
11 approaches were challenging for many participants and the importance of help with interpreting  
12 information about risk and how to act on it were stressed.  
13  
14

## 15 16 **Views on proactive approaches to dementia**

17 Despite their confusion about dementia and proactive approaches, several participants expressed  
18 generally positive views towards the concept of proactive approaches, such as ‘the earlier the  
19 diagnosis the better’, without articulating any specific benefits of different methods. Some  
20 participants valued general information on risk reduction but not detailed information about their  
21 personal risk of developing dementia. Only one participant commented that attitudes to proactive  
22 approaches in the abstract might change if personally faced with such approaches. In light of varied  
23 individual preferences one participant suggested that individuals should be provided with a range of  
24 options (Box 3).  
25  
26

## 27 **Perceived benefits and limitations of proactive approaches to dementia**

28 While some participants questioned the value of proactive approaches for a condition for which no  
29 cure was available, others valued the possibility of reducing risk and/or accessing disease-slowing  
30 treatment (Box 3). Early diagnosis and, to a lesser extent, information on risk were also thought to  
31 facilitate planning for the future, both for the individual affected and – often more importantly –  
32 their families. Participants acknowledged that a significant limitation of proactive approaches was  
33 the fact that information did not automatically result in behaviour change. Regardless of whether or  
34 not individuals chose to act on risk information, some participants felt that providing such  
35 information increased individual choice.  
36  
37

## 38 **Psychological consequences of proactive approaches**

39 Views on the psychological consequences of proactive approaches varied. Participants who had  
40 undergone either formal or informal assessment for memory problems described their relief on  
41 finding that they did not have dementia; others felt that even receiving a diagnosis of dementia  
42 could be a relief. In contrast, other participants felt that proactive approaches while they were  
43 asymptomatic (e.g. genetic screening, risk assessment) could create considerable anxiety (Box 3).  
44  
45

46 Perceptions of dementia were thought to influence the psychological consequences of proactive  
47 approaches; participants felt that people who associated dementia with advanced disease would be  
48 afraid of finding out that they were at risk or had a diagnosis of dementia. While discussions focused  
49 primarily on the psychological impacts of being given information about risk or possible diagnosis of  
50 dementia, the potential of proactive approaches to generate stress and anxiety was also highlighted.  
51  
52  
53  
54  
55  
56  
57  
58  
59  
60

## Practical issues in enacting proactive approaches

This theme explores the suggestions made by participants about how proactive approaches might be integrated into practice and the challenges and questions this may raise.

### Existing and potential new opportunities for implementation

The most common suggestion for introducing proactive approaches was to embed them in routine health check-ups, for example, the annual health review of older adults. Since this approach would focus only on older adults, routine risk assessments for younger adults were also suggested, with follow-up for those at higher risk. This was seen as preferable to introducing a new approach focusing exclusively on dementia and thought by participants to 'normalise' the inclusion of potentially anxiety provoking questions concerning memory loss (Box 4). To address rising GP workload and financial pressures on services, participants suggested that self-completion questionnaires linked to patient records could be used or that other members of the primary care team could be involved. A few participants suggested that alternative venues such as community centres or health buses, would offer more relaxed environments for proactive approaches.

### Barriers to implementation of proactive approaches

Participants identified three main barriers to implementing a proactive approach in primary care: access to GPs; a lack of continuity of care and the perceived reluctance of people with dementia to acknowledge their problems and seek help. Participants highlighted the difficulties in getting appointments with GPs and the limited time available within appointments. While participants felt that discussing concerns about memory problems would be easier with a GP with whom they had an established relationship, many had experienced a lack of continuity of care (Box 4).

In addition to these problems, a number of barriers to early diagnosis were identified. Participants suggested that people with dementia or memory problems might be reluctant to seek help and that even those seen by a GP might present themselves in ways which hid their difficulties. Participants acknowledged the tendency to underestimate alcohol or cigarette consumption and thought that similar behaviour would apply to questions about memory. Concerns were also raised about the ability of people with memory problems to recognise their own difficulties. In light of these concerns, there was a general preference for 'objective' tests (i.e. genetic or blood tests - which are not currently available) which did not rely on self-reported information.

### Ethical considerations

Participants identified a number of ethical issues relating to proactive approaches. Some felt that seeking consent prior to proactive approaches was essential to enable patients to make informed decisions and prevent distress. Participants felt that time and support was needed to ensure that patients fully understood the purpose, potential outcomes and implications of tests and did not simply comply with any questions asked by their GP. Particular concerns were raised about the case finding approach and how this would be integrated into routine consultations (Box 4).

Participants stressed the importance of providing appropriate support services (particularly for people with no close family and limited social networks) prior to introducing proactive approaches. One person with experience of genetic screening highlighted the need for emotional support during the process. A final ethical issue raised during the task groups was the possibility of increasing stigma towards individuals who developed dementia (regardless of whether or not they had taken steps to

1  
2  
3 reduce the risk of developing the disease). This was particularly evident during some task groups in  
4 which participants spoke pejoratively about individuals who were perceived not to respond  
5 'appropriately' to risk information.  
6  
7

## 8 9 **Alternatives to proactive approaches**

10 In addition to discussing integration of proactive approaches in primary care, participants suggested  
11 introducing approaches to target behaviour change at a population level including increasing  
12 awareness of dementia and health promotion or policy initiatives to address risk factors.  
13

### 14 **Raising awareness of dementia across the life course**

15 Increasing awareness of dementia was seen as key to: reducing stigma; improving integration of  
16 people with dementia; and encouraging people to seek help at an earlier stage. Although awareness  
17 raising was discussed in all but one of the task groups, the emphasis varied markedly between  
18 groups. Awareness raising was generally seen as relevant to the entire population. Existing UK  
19 initiatives such as Dementia Friends<sup>25</sup> and the Prime Minister's Challenge<sup>26</sup> were viewed positively  
20 (Box 5).  
21  
22

23 Initiatives to raise dementia awareness among specific groups including older people and children  
24 were discussed by some groups. Some participants felt that including children was essential to effect  
25 a societal change, others argued against targeting younger generations either to avoid burdening  
26 them with information about dementia or because of perceptions that they were less likely to  
27 engage with an illness strongly related to older age.  
28  
29

30 Having accessible information presented by a credible source was key to awareness raising. One  
31 participant emphasised the importance of avoiding 'medical jargon' and presenting information that  
32 people could relate to. A range of existing opportunities for disseminating information were  
33 suggested including information in GP surgeries, community centres and patient participation  
34 groups.  
35  
36

### 37 **Health promotion: policy and practice initiatives**

38 A number of aspects of health promotion were discussed by participants including the extent to  
39 which dementia-specific advice was needed and the most appropriate age group to target. There  
40 was a general consensus that health promotion should not focus specifically on dementia, but  
41 prioritise a healthy lifestyle. As with awareness raising, views differed over whether health  
42 promotion campaigns should target children and the role of schools in promoting a healthy lifestyle  
43 (Box 5).  
44  
45

46 Support at a government level was clearly relevant to both awareness raising and health promotion.  
47 However, concerns over the lack of reach of these types of initiatives, led some participants to  
48 suggest that policy changes might be more effective. Taxing certain foods or enforcing limits on the  
49 food industry were most frequently suggested as ways of 'enforcing' a healthier lifestyle. While the  
50 former was welcomed by some, others were concerned about the potential loss of individual  
51 freedom. Concerns were expressed about frequently changing advice on healthy diet and lifestyle  
52 since this created uncertainties over how to act on such information and potentially undermined the  
53 potential value of both health promotion and providing risk information.  
54  
55  
56  
57  
58  
59

## DISCUSSION

Although presentations were embedded within each task group to introduce dementia case finding, dementia risk assessment and genetic screening, these were insufficient to ensure that participants fully understood the key concepts. They were, however, able to comment on the general principles underlying earlier diagnosis and risk assessment for dementia. Earlier diagnosis was generally welcomed by all participants but views varied regarding risk assessment and genetic screening prior to the emergence of symptoms. There was a preference to embed risk assessment within routine health checks, which focused on achieving a healthier lifestyle, rather focusing specifically on dementia. Participants felt that such health checks should be more widely available and provided by a range of health professionals, including nurses. They also emphasised the need to explore preferences and ensure individuals understand what is involved prior to introducing proactive approaches into routine practice. The confusion evident during the task groups confirms the importance of providing accessible information to enable people to make informed decisions. While participants expressed a strong preference for objective measures rather than those relying on self-reported behaviour, this is at odds with the types of risk assessment tools currently available. Although participants also spoke positively about the need for population approaches to promoting healthy lifestyles, some recognised the potential for negative consequences for individuals who did not adopt recommended lifestyle changes.

The confusion amongst our public participants around dementia as a condition, and approaches to its earlier identification, is unsurprising in an area where professionals themselves struggle to achieve consensus<sup>27 28</sup> and expert diagnostic classifications change<sup>29</sup>. However in terms of public attitudes towards earlier diagnosis of dementia, our findings mirror a systematic review which found that both people with and without cognitive impairment wanted to know sooner, rather than later, if they had dementia in order to better prepare for their future<sup>30</sup>. Notwithstanding one of the key challenges around introducing approaches to the earlier identification of people with dementia, and also those at higher risk, is a continuing professional stigma around using the diagnostic label of dementia and opening saying the D word to patients despite increasing public awareness campaigns<sup>31</sup>. Variations in international clinical practice around the use of Mild Cognitive Impairment as a diagnostic label further increase professional inconsistencies<sup>32</sup>.

In terms of identifying those at higher risk of developing dementia, it is interesting to note our participants' preference for such approached to be part of an integrated, holistic approach to maintaining health in mid/late life rather than dementia specific initiatives. Such results lend support to current research evaluating holistic health and wellbeing risk appraisal tools.<sup>33</sup> Earlier qualitative research exploring public knowledge of dementia risk factors and views on risk reduction approaches found reasonably good knowledge of factors which contribute to healthy ageing.<sup>19</sup> Interestingly fear of developing dementia, and the need to improve public knowledge about dementia, were considered major motivators amongst participants towards adopting a healthier lifestyle and improved health behaviours.<sup>19</sup>

Our qualitative study had several limitations. Data collection ceased due to time limitations on the study period; theoretically data collection should have continued until data saturation was achieved. This study explored the perceptions of members of the public, none of whom had dementia. The focus was therefore on case finding, risk assessment/reduction and genetic screening as abstract

1  
2  
3 concepts; participants' views may differ when facing such activities at a personal level. The limited  
4 public understanding of dementia<sup>34</sup> was confirmed in the present study. This suggests that future  
5 studies may need to consider either focusing on a single proactive approach (e.g. genetic screening)  
6 to avoid introducing multiple concepts, or that data collection may need to be conducted over a  
7 longer period to enable participants to become familiar with the concepts and facilitate informed  
8 discussions, for example through citizens' juries.<sup>35</sup> Due to personnel changes, data analysis was  
9 conducted by researchers who had no previous involvement in the project. However, as the  
10 researchers were more distant from the data, this facilitated a more critical stance and the  
11 identification of underlying themes indirectly linked with the study objective.  
12  
13

14  
15 Recent data on the changing incidence and prevalence of dementia internationally<sup>4</sup> has generated  
16 research interest in prevention through controlling risk factors at both individual and population  
17 levels.<sup>36</sup> Whilst interim findings from a randomised controlled trial of a complex, multicomponent  
18 intervention (diet, physical exercise, brain training, vascular risk reduction) targeting individual  
19 dementia risk have revealed promising results,<sup>37</sup> the search for feasible and valid risk assessment  
20 'tools' to identify those who would benefit most from such interventions is ongoing.<sup>15</sup> There has  
21 however been little exploration of the acceptability of such approaches to patients and the public<sup>19</sup>  
22 especially in dementia where public understanding of the illness is still low.<sup>34</sup> With electronic  
23 vascular disease risk assessment tools such as Q-RISK2, which allow healthcare professionals to  
24 quickly calculate an individual's future risk,<sup>38 39</sup> now embedded in routine primary care practice,  
25 similar methods have been used to develop a dementia risk tool.<sup>16</sup> The validity of this tool is  
26 currently under study, it will however be equally important to also explore its acceptability to  
27 patients and healthcare professionals, especially if considering the possibility of patient self-  
28 administered tools in the future.<sup>40</sup> In terms of the implications for practice, our study shows that the  
29 introduction of proactive approaches to dementia identification should also be accompanied by  
30 better quality information about dementia (and the likelihood of developing dementia) and  
31 psychological support for those undergoing risk assessment as well as addressing important public  
32 concerns about the quality and availability of current dementia care.  
33  
34  
35  
36

37  
38 As international policy shifts from finding a 'cure' for dementia to focus on more efficient ways of  
39 future care provision, including reducing numbers with dementia, research opportunities are  
40 beginning to address the prevention as well as 'cure and care' agenda.<sup>36 41</sup> Accurate identification of  
41 an individual's risk of developing dementia, in order to identify those who can most benefit from  
42 appropriate intervention, will be one part of this new agenda; any future research must however  
43 also explore the ethical and personal concerns associated with any newly developed approaches to  
44 determining an individual's future risk of developing dementia. Whilst the usefulness and efficiency  
45 of general lifestyle checks have been questioned,<sup>42</sup> these may be a more acceptable way of  
46 translating dementia risk reduction approaches into usual care. The considerable confusion amongst  
47 our participants around approaches to earlier identification of both people with possible dementia  
48 and those at higher risk of developing the illness in the future suggests an urgent need for greater  
49 education focused on dementia risk and individual risk reduction.  
50  
51  
52  
53

54  
55 **Funding:** This paper presents independent research funded by the National Institute for Health  
56 Research School for Primary Care Research (NIHR SPCR), project number 261. Louise Robinson is  
57  
58

1  
2  
3 funded by a National Institute for Health Research Professorship (NIHR-RP-011-043). The views  
4 expressed are those of the author(s) and not necessarily those of the NIHR, the National Health  
5 Service or the Department of Health.  
6

7 **Contributor statement:** LR conceived the study and obtained project funding. CD and LN carried out  
8 data collection; CB, EM and LP were responsible for data analysis. All authors contributed to drafting  
9 of the paper and approved the final manuscript.  
10

11 **Copyright:** The Corresponding Author has the right to grant on behalf of all authors and does grant  
12 on behalf of all authors, [a worldwide licence](#) to the Publishers and its licensees in perpetuity, in all  
13 forms, formats and media (whether known now or created in the future), to i) publish, reproduce,  
14 distribute, display and store the Contribution, ii) translate the Contribution into other languages,  
15 create adaptations, reprints, include within collections and create summaries, extracts and/or,  
16 abstracts of the Contribution, iii) create any other derivative work(s) based on the Contribution, iv)  
17 to exploit all subsidiary rights in the Contribution, v) the inclusion of electronic links from the  
18 Contribution to third party material where-ever it may be located; and, vi) licence any third party to  
19 do any or all of the above.  
20  
21  
22

23 **Competing interest statement:** All authors have completed the Unified Competing Interest form and  
24 declared any relevant support from any organisation for the submitted work in the previous three  
25 years. Professor Robinson reports grants from the National Institute of Health Research  
26 Professorship scheme during the conduct of the study.  
27

28 **Transparency declaration:** LR affirms that the manuscript is an honest, accurate, and transparent  
29 account of the study being reported; that no important aspects of the study have been omitted; and  
30 that any discrepancies from the study as planned (and, if relevant, registered) have been explained.  
31

32 **Patient involvement:** The theme of this research was one of the key research priorities identified by  
33 the NIHR Dementia and Neurodegenerative Diseases research network (DeNDRoN) Primary Care  
34 Clinical Study Group (PCCSG), an integrated patient, public and researcher group of their last priority  
35 setting exercise. Members of this group helped refine the research proposal prior to submission to  
36 NIHR.  
37  
38

39 **Data sharing statement:** No additional data is available.  
40  
41  
42

## 43 REFERENCES

- 44 1. Alzheimer's Disease International. World Alzheimer Report 2015: The Global Impact of Dementia:  
45 an Analysis of Prevalence, Incidence, Cost and Trends. London: Alzheimer's Disease  
46 International, 2015.
- 47 2. Wu YT, Fratiglioni L, Matthews FE, et al. Dementia in western Europe: epidemiological evidence  
48 and implications for policy making. *Lancet Neurol* 2016;15 doi: 10.1016/s1474-  
49 4422(15)00092-7
- 50 3. Larson EB, Langa KM. What's the "take home" from research on dementia trends? *PLoS One*  
51 2017;14(3):e1002236. doi: 10.1371/journal.pmed.1002236
- 52 4. Prince M, Ali GC, Guerchet M, et al. Recent global trends in the prevalence and incidence of  
53 dementia, and survival with dementia. *Alzheimers Res Ther* 2016;8(1):23. doi: 10.  
54 1186/s13195-016-0188-8  
55  
56  
57  
58  
59  
60

- 1
- 2
- 3 5. Matthews FE, Arthur A, Barnes LE, et al. A two-decade comparison of prevalence of dementia in
- 4 individuals aged 65 years and older from three geographical areas of England: results of the
- 5 Cognitive Function and Ageing Study I and II. *Lancet* 2013;382(9902):1405-12.
- 6 6. Matthews FE, Stephan BCM, Robinson L, et al. A two decade dementia incidence comparison from
- 7 the Cognitive Function and Ageing Studies I and II. *Nat Commun* 2016;7 doi:
- 8 10.1038/ncomms11398
- 9 7. Alzheimer's Disease International. World Alzheimer Report 2014: Dementia and Risk Redution.
- 10 London: Alzheimer's Disease International 2014.
- 11 8. Department of Health. Prime Minister's challenge on dementia 2020. London, 2015.
- 12 9. UK National Screening Committee. The UK NSC recommendation on screening for dementia. Jan
- 13 2015 2015 [Available from: [www.screening.nhs.uk/dementia](http://www.screening.nhs.uk/dementia) accessed 26/06/2017.
- 14 10. World Health Organization. Draft global action plan on the public health response to dementia
- 15 2016 [Available from:
- 16 [http://www.who.int/mental\\_health/neurology/dementia/action\\_plan\\_consultation/en/](http://www.who.int/mental_health/neurology/dementia/action_plan_consultation/en/)
- 17 accessed 12 July 2017.
- 18 11. Wald N, Morris J. What is case-finding? *Journal of Medical Screening* 1996;3(1):1.
- 19 12. McCartney M. "Case finding" in dementia is simply screening with no evidence of benefit. *BMJ*
- 20 2014;349:g4791.
- 21 13. NHS England. Commissioning for quality and innovation (CQUIN) 2014/15 guidance 2014
- 22 [Available from: [https://www.england.nhs.uk/wp-content/uploads/2014/12/sc-cquin-](https://www.england.nhs.uk/wp-content/uploads/2014/12/sc-cquin-guid.pdf)
- 23 [guid.pdf](https://www.england.nhs.uk/wp-content/uploads/2014/12/sc-cquin-guid.pdf); accessed 28 May 2017.
- 24 14. NHS England. Enhanced Service Specification: Facilitating timely diagnosis and support for people
- 25 with dementia 2015/16 2015 [Available from:
- 26 [https://www.england.nhs.uk/commissioning/wp-](https://www.england.nhs.uk/commissioning/wp-content/uploads/sites/12/2015/03/facilitate-timly-diag-dementia.pdf)
- 27 [content/uploads/sites/12/2015/03/facilitate-timly-diag-dementia.pdf](https://www.england.nhs.uk/commissioning/wp-content/uploads/sites/12/2015/03/facilitate-timly-diag-dementia.pdf) accessed 28 May 2017.
- 28 15. Tang EYH, Harrison S, Errington L, et al. Current developments in dementia risk prediction
- 29 modelling: An updated systematic review. *PLoS One* 2015;10(9):e0136181.
- 30 16. Walters K, Haroon S, Peterson I, et al. Predicting dementia risk in primary care: development
- 31 and validation of the Dementia Risk Score using routinely collected data. *BMC Med*
- 32 2016;14(6) doi: 10.1186/s12916-016-0549-y
- 33 17. Kivipelto M, Ngandu T, Laatikainen T, et al. Risk score for the prediction of dementia risk in
- 34 20 years among middle aged people: a longitudinal, population-based study. *Lancet Neurol*
- 35 2006;5 doi: 10.1016/s1474-4422(06)70537-3
- 36 18. Barnes DE, Covinsky KE, Whitmer RA, et al. Dementia risk indices: A framework for identifying
- 37 individuals with a high dementia risk. *Alzheimers Dement* 2010;6(2):138-41.
- 38 19. Kim S, Sargent-Cox KA, Anstey KJ. A qualitative study of older and middle-aged adults' perception
- 39 and attitudes towards dementia and dementia risk reduction. *Journal of advanced nursing*
- 40 2015;71(7):1694-703. doi: 10.1111/jan.12641 [published Online First: 2015/02/24]
- 41 20. Martin S, Kelly S, Khan A, et al. Attitudes and preferences towards screening for dementia: a
- 42 systematic review of the literature. *BMC geriatrics* 2015;15(1):66.
- 43 21. Hersch J, Jansen J, Barratt A, et al. Women's views on overdiagnosis in breast cancer screening: a
- 44 qualitative study. *BMJ : British Medical Journal* 2013;346 doi: 10.1136/bmj.f158
- 45 22. Mair F, May C, Murray E, et al. Understanding the implementation and integration of E-Health
- 46 services. London: NIHR, 2010.
- 47 23. Tong A, Sainsbury P, Craig J. Consolidated criteria for reporting qualitative research (COREQ): a
- 48 32-item checklist for interviews and focus groups. *International journal for quality in health*
- 49 *care* 2007;19(6):349-57.
- 50 24. Braun V, Clarke V. Using thematic analysis in psychology. *Qualitative research in psychology*
- 51 2006;3(2):77-101.
- 52 25. Alzheimer's Society. Dementia Friends [Available from: <https://www.dementiafriends.org.uk/>
- 53 accessed 26/06/2017.
- 54
- 55
- 56
- 57
- 58
- 59
- 60

- 1
- 2
- 3 26. Department of Health. Prime Minister's Challenge on Dementia 2020. London, UK: Department
- 4 of Health 2015.
- 5 27. Peterson RC, Caracciolo B, Brayne C, et al. Mild cognitive impairment: a concept in evolution.
- 6 *Journal of Internal Medicine* 2014;275(3):214-28. doi: 10.1111/joim.12190
- 7 28. Tang EY, Brayne C, Albanese E, et al. Mild cognitive impairment definitions: more evolution than
- 8 revolution. *Neurodegenerative Disease Management* 2015;5(1):11-7. doi:
- 9 10.2217/nmt.14.42
- 10 29. Sachdev PS, Blacker D, Blazer DG, et al. Classifying neurocognitive disorders: the DSM-5 approach.
- 11 *Nature Reviews Neurology* 2014;10(11):634-42. doi: 10.1038/nrneuro.2014.181
- 12 30. Van den Dungen P, van Kuijk L, van der Wouden J, et al. Preferences regarding disclosure of a
- 13 diagnosis of dementia: a systematic review. *International Psychogeriatrics*
- 14 2014;26(10):1603-18. doi: 10.1017/S1041610214000969
- 15 31. Robinson L, Gemski A, Abley C, et al. The transition to dementia—individual and family
- 16 experiences of receiving a diagnosis: a review. *International Psychogeriatrics*
- 17 2011;23(07):1026-43.
- 18 32. Whitehouse PJ, George D. Further limits on labels for cognitive impairment: can we diagnose
- 19 what we don't know? *The American Journal of Geriatric Psychiatry* 2011;19(11):984. doi:
- 20 <http://dx.doi.org/10.1097/JGP.0b013e3182330fef>
- 21 33. Walters K, Kharicha K, Goodman C, et al. Promoting independence, health and wellbeing for
- 22 older people: a feasibility study of computer-aided health and social risk appraisal system in
- 23 primary care. *BMC Fam Pract* 2017;18(47) doi: 10.1186/s12875-017-0620-6
- 24 34. Mitchell S, Ridley SH, Sancho RM, et al. The future of dementia risk reduction research: barriers
- 25 and solutions. *J Public Health* 2016:1-7. doi: 10.1093/pubmed/fdw103
- 26 35. Lenaghan Jo CA. Citizens' Juries: Theory into Practice. London: Institute for Public Policy Research
- 27 1997.
- 28 36. Anstey KK, Eramudugolla R, Hosking DE, et al. Bridging the translation gap: from dementia risk
- 29 assessment to advice on risk reduction. *J Prev Alzheimers Dis* 2015;2(3):189-98.
- 30 37. Ngandu T, Lehtisalo J, Solomon A, et al. A 2 year multidomain intervention of diet, exercise,
- 31 cognitive training, and vascular risk monitoring versus control to prevent cognitive decline in
- 32 at-risk elderly people (FINGER): a randomised controlled trial. *Lancet*;385(9984):2255-63. doi:
- 33 10.1016/S0140-6736(15)60461-5
- 34 38. Hippisley-Cox J, Coupland C, Vinogradova Y, et al. Predicting cardiovascular risk in England and
- 35 Wales: prospective derivation and validation of QRISK2. *BMJ* 2008;336(7659):1475-82. doi:
- 36 10.1136/bmj.39609.449676.25
- 37 39. Hippisley-Cox J, Coupland C, Vinogradova Y, et al. Performance of the QRISK cardiovascular risk
- 38 prediction algorithm in an independent UK sample of patients from general practice: A
- 39 validation study. *Heart* 2008;94(1):34-9. doi: 10.1136/hrt.2007.134890
- 40 40. Nolan T, Dack C, Pal K, et al. Patient reactions to a web-based cardiovascular risk calculator in
- 41 type 2 diabetes: a qualitative study in primary care. *Br J Gen Pract* 2015;65(632):e152-60. doi:
- 42 10.3399/bjgp15X683953
- 43 41. Birdi R, Stephan BC, Robinson L, et al. Can we influence the epidemiology of dementia?
- 44 Perspectives from population-based studies. *Postgrad Med J* 2015;91(1081):651-4. doi:
- 45 10.1136/postgradmedj-2015-133244
- 46 42. Frost H, Haw S, Frank J. Promoting health and well-being in later life: interventions in primary
- 47 care and community settings. Edinburgh: Chief Scientist Office, 2011.
- 48
- 49
- 50
- 51
- 52
- 53
- 54
- 55
- 56
- 57
- 58
- 59
- 60



**Table 1: Overview of themes and subthemes**

|                                                                                                                                                                                                              |
|--------------------------------------------------------------------------------------------------------------------------------------------------------------------------------------------------------------|
| Confusion around dementia and proactive approaches                                                                                                                                                           |
| <ul style="list-style-type: none"><li>• Limited understandings of dementia</li><li>• Making sense of proactive approaches</li></ul>                                                                          |
| Views on proactive approaches to dementia                                                                                                                                                                    |
| <ul style="list-style-type: none"><li>• Perceived benefits and limitations of proactive approaches</li><li>• Psychological consequences of proactive approaches</li></ul>                                    |
| Practical issues in enacting proactive approaches to dementia                                                                                                                                                |
| <ul style="list-style-type: none"><li>• Existing and potential new opportunities for implementation</li><li>• Barriers to implementation of proactive approaches'</li><li>• Ethical considerations</li></ul> |
| Alternatives to proactive approaches to dementia                                                                                                                                                             |
| <ul style="list-style-type: none"><li>• Raising awareness of dementia across the life course</li><li>• Health promotion: policy and practice initiatives</li></ul>                                           |

**Box 1: Task group content and format**

1. Pre task group questionnaire (participant demographic details; personal experience of dementia; knowledge about dementia risk factors)
2. Presentation 1
  - Introduction to dementia and the process of diagnostic assessment: ‘facts and figures’ – numbers living with dementia; knowledge to date regarding cause; clinical presentation; dementia sub-types; clinical assessment processes.
  - Case finding in high risk groups; factors contributing to dementia; groups at high risk; pro-active methods for earlier detection of dementia e.g. case finding.
3. Group discussion 1
4. Presentation 2
  - Risk assessment and risk assessment tools; risk factors for dementia; general process of disease risk assessment and risk assessment tools; specific dementia risk assessment tools.
  - Genetic screening
5. Group discussion 2
6. Post task group questionnaire (knowledge about dementia risk factors)

**Box 2: Confusion around dementia and proactive approaches****Limited understandings of dementia**

'Now I don't know to what degree you suffer Alzheimer's, can you get milder cases, more severe cases? Do people just amble along with mild cases of dementia?' [FG3, P17, female]

'Then you say 'dementia', what do you mean? I know that's stupid but my partner's got mild cognitive impairment which could be classified as dementia, because he's got memory problems, or it might be mild cognitive impairment, which is it?' [FG2, P5, female]

'Dementia as far as I'm aware, dementia is one form of Alzheimer's disease' [FG2, P6, male]

'I think language is very powerful. You know, when I was younger, people who had memory problems, do you know, they were a bit wandered you know, they were just getting a bit worn out, you know. The language was kind, but, you talk about dementia, dementia, demented, crazy, and that, that, that encourages people to flee from it, to conceal it and not to share it-' [FG2, P10, male]

**Making sense of proactive approaches**

'Does it not smack a bit of Big Brother if you're having a register? 'This person is going to get dementia. This person is going to get dementia. This person isn't.' It smacks of Big Brother sort of...' [FG5, P24, male]

'I don't really know what genetic testing amounts to. It was mooted to me once because I've got an eye condition and it might be genetic, that it was possible to have that done. I was advised that it's quite a big process to go through and it might not give you anything clear at the end of the day. '[FG6, P31, male]

'I mean you really can't prove that if you're like say - do more exercise, change your diet and all that, will it stop you getting that?' [FG3, P14, male]

'And then it [health check] came back with a letter, with a big long 'score this for this, and this for that' but it didn't explain what those numbers meant.' [FG1. P4, female]

**Box 3: Views on proactive approaches****General views on proactive approaches**

'I don't want to know that I might be going to get it. I don't mind being told that, "If you do this, this and this you're less likely to have it", just as with heart disease or anything like that.' [FG3, P11, female]

'But perhaps you need different ways, different tools, because what we seem to be saying is that different things suit different people.' [FG2, P9, female]

**Perceived benefits and limitations of proactive approaches**

'But I think the point here is if you've got high cholesterol there's a blood test that shows that and the doctor can do something about it. If you're going to develop dementia it's no good telling me unless you can cure it, I can do something myself about it or you can help me.' [FG3, P16, male]

'If there's medication which can slow it down, delay it or whatever and I could have that medication I would be silly to not have it.' [FG5, P27, female]

'...with dementia, I think I would like to know so I could get my life ironed out for my kids, because I wouldn't like to leave them in dire straits.' [FG4, P22, female]

'I think an early diagnosis might be quite frightening at the time but I think it's only fair on your family so that they know what's happening for you and for them to prepare themselves as well for what might happen, if they would be prepared to look after you or if they feel you might need to go into care' [FG3, P17, female]

'The majority of people will say, "It will never happen to me anyway. I don't need that test. I only smoke 20 fags a day and my neighbour smokes 30 so he's far more likely to..." [FG3, P16, male]

'You can choose to ignore it, but you've been given the information and it's your choice what you do with it, whereas at the minute, it's not there.' [FG6, P30, female]

**Psychological consequences of proactive approaches**

'But there was no sign of it [dementia] in my brain at all. Now I think that was fantastic. I now know that there was no sign of it and that's really, really reassuring.' [FG5, P23, female]

'Do I really want to have the worry about me? It may happen. If I had symptoms of it, then like yourself I would go and probably find out. But I don't feel like I've got symptoms of it, so I don't really want to know that I could have it when I haven't got it, when I feel...' [FG5, P28, female]

'I think there are a percentage of people who wouldn't want to know because they're so scared of the diagnosis because they've seen what happens to people. They've seen relatives go into nursing homes and the eventual outcome.' [FG6, P29, female]

'I did some of these cognitive tests on the internet and I got myself really upset and stressed when I thought I wasn't hitting the time allowed. I dropped out of that because I felt under pressure.' [FG3, P17, female]

**Box 4: Existing and potential new opportunities for implementation****Existing and potential new opportunities for implementation**

'My doctors have started to do an annual review of people, so on their birthday they call you in, you go and see the practice nurse and they give you an MOT certificate, basically. So it could be at that point that if memory things were introduced to that kind of review... That's just a standard thing so everybody understands that they're going to go through that test, or whatever, then I think incorporating in that could help.' [FG3, P11, female]

'So you could have that health check on all those things, the blood pressure and if that regardless of age, so you don't have to hit the 60 box, if that health check put you in those risk factors then there's follow-up and questions asked about memory' [FG4, P20, female]

'You can go into your doctor's surgery and you don't necessarily have to see a doctor now do you? No, you're seeing a practice nurse. It could be at that level that the tests are done and the risks are quoted to you. Then if you felt that you needed to see a doctor to explain it more or to give you better information...' [FG3, P16, male]

'I think rather than saying, "Oh, go to the GPs." I haven't been there for three years and I don't need to go there now. Things popping up, but things more widespread across the community so that people will come across them more frequently. In what shape or form, I suppose that's debateable' [FG6, P31, male]

**Barriers to implementing proactive approaches**

'It's getting appointments to see them, that's the problem. From personal experience, trying to get to see a GP, you just give up.' [FG6, P31, male]

'They're too busy. You know, you don't get enough time to do anything like that in my GP's surgery. You never, ever get it, because you don't get enough minutes' appointment.' [FG1, P4, female]

'There's none of the continuity like when you were smaller; we had a family doctor who was there for everybody's health for 50 years.' [FG5, P27, female]

'I do tend to try and- well, I do think I tell the truth in these questionnaires. But you may think, you've got a different idea, perhaps, than somebody else. You might under-exaggerate, or over-exaggerate. You think you're telling the truth, but actually...' [FG1, P1, female]

'People with dementia, in the early stages, will hide the fact that they've got a problem and can sometimes fool quite a lot of people a lot of the time.' [FG3, P11, female]

'It also requires people to have insight into their memory problem and often people just haven't, have they?' [FG2, P9, female]

**Ethical considerations**

'As long as it's an informed consent, but, I think, often [patients] will go with what the GP says because they trust their GP so it's a big responsibility.' [FG2, P5, female]

'You're going to get a lot of people who will go to the GP for a completely different reason and the GP might turn round and say, "Do you think you have a memory problem?" You think, "Well, I've come about my in-growing toenail. No, I don't. I'm not here about that."' [FG6, P29, female]

'I think you would need counselling [...] yes, but then the whole thing and then it hits you on an

1  
2  
3 emotional level and that's what you need help.' [FG2, P8, female]  
4

5 'If you are going to put yourself forward to identify your risk of dementia, then you want to know what  
6 will happen if you are at high risk of dementia. What services are out there, what's the support,  
7 available and if there's nothing available for you, you might think, "Well, what's the point of knowing."  
8 [FG2, P9, female]  
9

10 'There's always going to be a percentage of the population, it's whether it's to do with health, whether  
11 it's to do with whatever, who just don't give a s\*\*\*. But also - but that impacts upon us, because  
12 eventually we're going to have to pay for the people who don't give a s\*\*\*. [FG4, P20, female]'  
13  
14  
15  
16  
17  
18  
19  
20  
21  
22  
23  
24  
25  
26  
27  
28  
29  
30  
31  
32  
33  
34  
35  
36  
37  
38  
39  
40  
41  
42  
43  
44  
45  
46  
47  
48  
49  
50  
51  
52  
53  
54  
55  
56  
57  
58  
59  
60

**Box 5: Alternatives to proactive approaches****Raising awareness of dementia across the life course**

'I mean, the dementia friends thing [...] if you can get everybody, you can get kids at school to understand how they can best talk to Granny, how they can react to somebody in the street who is wandering or who's talking to themselves, how to be nice to the person, how to support them.'  
[FG2, P7, female]

'I think acceptance of it, even it was part of primary/secondary, actually getting it in the schools and getting it at that young age to understand that they're not that person. It's just part of a condition they've got, and acceptance.' [FG6, P30, female]

'Having taught in an FE college and taught health and social care subjects, 16 to 19 year olds think they're going to live forever. When you try to talk to them about smoking and drinking, it's just over the top of their head. I don't know. Even if they've had experience of grandparents with dementia they think, "It's never going to happen to me and I'm going to live forever and who cares what happens to me when I get to 65?"' [FG6, P29, female]

**Health promotion: policy and practice initiatives**

'There's a general advice there that's not specific to dementia [...] there's a generic thing going on about 'well if you want to keep your heart going, you need to give up smoking'. It's the same things. So maybe we need to actually pull dementia or the risks of dementia into that general health and wellbeing better than perhaps we're currently doing.' [FG4, P19, male]

'The schools have enough on their plate with directives coming to say, "You must teach X amount of maths, English and science" and that's push, push, push. They don't leave a lot of time. They've taken less PE. So schools don't have that facility' [FG3, P12, female]

'Not everybody is going to get that education, not everybody is going to listen to that education. And there's parental influence on it, social influence on it, economic influence on it. So I think you've got sort of - I believe very strongly in personal choice, but I think there's a point where you've got to look at it more on a sort of society level.' [FG4, P18, male]

With healthy eating, at least now they're going to put this sugar tax on, but I would put tax on a load of other things like that. [FG3, P14, male]

'The trouble is with these diets, again, you get it in the papers, "Don't drink tea, because it's got this... Don't drink coffee because it's got that." And then a few months down the line, "Oh, tea's good for you. Coffee is good for you." What do you believe?' [FG4, P22, female]

## COREC checklist

### Domain 1: Research team and reflexivity

| Personal Characteristics |                                                                                 |                                                                                                                                                                                                                                                                                                                                                                                                                                                                      |
|--------------------------|---------------------------------------------------------------------------------|----------------------------------------------------------------------------------------------------------------------------------------------------------------------------------------------------------------------------------------------------------------------------------------------------------------------------------------------------------------------------------------------------------------------------------------------------------------------|
| 1.                       | Interviewer/facilitator<br>Which author/s were involved in data collection?     | CD & LN (all task groups); LR (pilot task group only)                                                                                                                                                                                                                                                                                                                                                                                                                |
| 2.                       | Credentials<br>What were the researcher's credentials? E.g. PhD, MD             | CB - MSc<br>CD - PhD<br>EM - PhD<br>LN - MclinRes<br>LP -<br>LR - MD, FRCGP                                                                                                                                                                                                                                                                                                                                                                                          |
| 3.                       | Occupation<br>What was their occupation at the time of the study?               | CB - senior research associate<br>CD - research associate<br>EM - research associate<br>LN - NIHR Academic Clinical Fellow<br>LP - research assistant<br>LR - Professor of Primary Care and Ageing                                                                                                                                                                                                                                                                   |
| 4.                       | Gender<br>Was the researcher male or female?                                    | All researchers were female                                                                                                                                                                                                                                                                                                                                                                                                                                          |
| 5.                       | Experience and training<br>What experience or training did the researcher have? | All researchers involved in data collection completed GCP training.<br>CB and CD are experienced qualitative researchers with extensive experience in dementia research.<br>LN is a general practitioner and undertook this study whilst studying for a Masters' degree which included training in qualitative methods.<br>EM is a health psychologist with previous qualitative experience gained during her PhD.<br>LP is an adult nurse with research experience. |



|                                       |                                                                                                                                                                          |                                                                                                                                                                |
|---------------------------------------|--------------------------------------------------------------------------------------------------------------------------------------------------------------------------|----------------------------------------------------------------------------------------------------------------------------------------------------------------|
|                                       |                                                                                                                                                                          | LR is an experienced dementia researcher and general practitioner                                                                                              |
| <b>Relationship with participants</b> |                                                                                                                                                                          |                                                                                                                                                                |
| 6.                                    | Relationship established<br>Was a relationship established prior to study commencement?                                                                                  | Participants in the pilot task group were known to the researchers as work colleagues; there was no prior relationship with participants in other task groups. |
| 7.                                    | Participant knowledge of the interviewer<br>What did the participants know about the researcher? e.g. personal goals, reasons for doing the research                     | Researchers discussed their interest in exploring views on case finding, risk assessment and genetic screening in dementia.                                    |
| 8.                                    | Interviewer characteristics<br>What characteristics were reported about the interviewer/facilitator? e.g. Bias, assumptions, reasons and interests in the research topic | None                                                                                                                                                           |

## Domain 2: study design

|                              |                                                                                                                                                                                                   |                                                                            |
|------------------------------|---------------------------------------------------------------------------------------------------------------------------------------------------------------------------------------------------|----------------------------------------------------------------------------|
| <b>Theoretical framework</b> |                                                                                                                                                                                                   |                                                                            |
| 9.                           | Methodological orientation and theory<br>What methodological orientation was stated to underpin the study? e.g. grounded theory, discourse analysis, ethnography, phenomenology, content analysis | Interpretive approach and thematic analysis                                |
| <b>Participant selection</b> |                                                                                                                                                                                                   |                                                                            |
| 10.                          | Sampling<br>How were participants selected? e.g. purposive, convenience, consecutive, snowball                                                                                                    | Convenience                                                                |
| 11.                          | Method of approach<br>How were participants approached? e.g. face-to-face, telephone, mail, email                                                                                                 | Face to face & poster inviting participation (Age UK); mail (Voice North). |
| 12.                          | Sample size<br>How many participants were in the study?                                                                                                                                           | 31                                                                         |

|                 |                                                                                                            |                                                                                                                                                                  |
|-----------------|------------------------------------------------------------------------------------------------------------|------------------------------------------------------------------------------------------------------------------------------------------------------------------|
| 13.             | Non-participation<br>How many people refused to participate or dropped out? Reasons?                       | 23 people were approached and either were not interested or did not attend the focus group. No information on reasons for non-participation is available.        |
| Setting         |                                                                                                            |                                                                                                                                                                  |
| 14.             | Setting of data collection<br>Where were the data collected? e.g. home, clinic, workplace                  | University (5 task groups); carers' centre (1 task group)                                                                                                        |
| 15.             | Presence of non-participants<br>Was anyone else present besides the participants and researchers?          | No. One task group was facilitated by three team members (CD, LN, LR); the remaining groups were facilitated by CD and LN.                                       |
| 16.             | Description of sample<br>What are the important characteristics of the sample? e.g. demographic data, date | Important characteristics for participants were gender, age and experience of dementia.                                                                          |
| Data collection |                                                                                                            |                                                                                                                                                                  |
| 17.             | Interview guide<br>Were questions, prompts, guides provided by the authors? Was it pilot tested?           | A structured powerpoint presentation was given by the facilitators to each task group and specific prompts for discussion were included within the presentation. |
| 18.             | Repeat interviews<br>Were repeat interviews carried out? If yes, how many?                                 | No                                                                                                                                                               |
| 19.             | Audio/visual recording<br>Did the research use audio or visual recording to collect the data?              | Yes, audio recording and full transcription                                                                                                                      |
| 20.             | Field notes<br>Were field notes made during and/or after the interview or focus group?                     | Yes                                                                                                                                                              |
| 21.             | Duration<br>What was the duration of the interviews or focus group?                                        | The duration of the task groups ranged from 51 to 120 minutes with a median of 105 minutes (mean 95 minutes)                                                     |
| 22.             | Data saturation<br>Was data saturation discussed?                                                          | Yes, during our on-going analysis.                                                                                                                               |
| 23.             | Transcripts returned                                                                                       |                                                                                                                                                                  |

|  |                                                                          |    |
|--|--------------------------------------------------------------------------|----|
|  | Were transcripts returned to participants for comment and/or correction? | No |
|--|--------------------------------------------------------------------------|----|

### Domain 3: analysis and findings

| Data analysis |                                                                                                                                                           |                                                                                |
|---------------|-----------------------------------------------------------------------------------------------------------------------------------------------------------|--------------------------------------------------------------------------------|
| 24.           | Number of data coders<br>How many data coders coded the data?                                                                                             | CB, EM & LP were involved in developing the coding frame.<br>EM coded the data |
| 25.           | Description of the coding tree<br>Did authors provide a description of the coding tree?                                                                   | Yes                                                                            |
| 26.           | Derivation of themes<br>Were themes identified in advance or derived from the data?                                                                       | Derived from the data                                                          |
| 27.           | Software<br>What software, if applicable, was used to manage the data?                                                                                    | NVivo 11                                                                       |
| 28.           | Participant checking<br>Did participants provide feedback on the findings?                                                                                | No                                                                             |
| Reporting     |                                                                                                                                                           |                                                                                |
| 29.           | Quotations presented<br>Were participant quotations presented to illustrate the themes / findings? Was each quotation identified? e.g. participant number | Yes                                                                            |
| 30.           | Data and findings consistent<br>Was there consistency between the data presented and the findings?                                                        | Yes                                                                            |
| 31.           | Clarity of major themes<br>Were major themes clearly presented in the findings?                                                                           | Yes                                                                            |
| 32.           | Clarity of minor themes<br>Is there a description of diverse cases or discussion of minor themes?                                                         | Yes                                                                            |

# BMJ Open

## Proactive approaches to identifying dementia and dementia risk; a qualitative study of public attitudes and preferences

|                                 |                                                                                                                                                                                                                                                                                                                                                                                                                                                             |
|---------------------------------|-------------------------------------------------------------------------------------------------------------------------------------------------------------------------------------------------------------------------------------------------------------------------------------------------------------------------------------------------------------------------------------------------------------------------------------------------------------|
| Journal:                        | <i>BMJ Open</i>                                                                                                                                                                                                                                                                                                                                                                                                                                             |
| Manuscript ID                   | bmjopen-2017-018677.R2                                                                                                                                                                                                                                                                                                                                                                                                                                      |
| Article Type:                   | Research                                                                                                                                                                                                                                                                                                                                                                                                                                                    |
| Date Submitted by the Author:   | 30-Nov-2017                                                                                                                                                                                                                                                                                                                                                                                                                                                 |
| Complete List of Authors:       | Robinson, Louise; Institute for Health and Society, Newcastle University<br>Dickinson, Claire; Institute for Health and Society, Newcastle University<br>Magklara, Eleni; Institute for Health and Society, Newcastle University<br>Newton, Lisa; Institute for Health and Society, Newcastle University<br>Prato, Laura; Institute for Health and Society, Newcastle University<br>Bamford, Claire; Institute for Health and Society, Newcastle University |
| <b>Primary Subject Heading</b>: | Mental health                                                                                                                                                                                                                                                                                                                                                                                                                                               |
| Secondary Subject Heading:      | General practice / Family practice, Global health, Public health                                                                                                                                                                                                                                                                                                                                                                                            |
| Keywords:                       | Organisation of health services < HEALTH SERVICES ADMINISTRATION & MANAGEMENT, Risk management < HEALTH SERVICES ADMINISTRATION & MANAGEMENT, Dementia < NEUROLOGY                                                                                                                                                                                                                                                                                          |
|                                 |                                                                                                                                                                                                                                                                                                                                                                                                                                                             |

SCHOLARONE™  
Manuscripts

View Only

1  
2  
3 **Proactive approaches to identifying dementia and dementia risk; a**  
4 **qualitative study of public attitudes and preferences**  
5  
6  
7  
8

9 Louise Robinson, Claire Dickinson, Eleni Magklara, Lisa Newton, Laura Prato, Claire Bamford.

10  
11 Institute of Health & Society, Newcastle University, Newcastle upon Tyne, UK.  
12

13  
14 Corresponding author and Guarantor for the paper: Louise Robinson, Institute of Health & Society,  
15 Newcastle University, Campus for Ageing and Vitality, Biomedical Research Building, Newcastle upon  
16 Tyne, NE4 5PL.

17 Email: [a.l.robinson@newcastle.ac.uk](mailto:a.l.robinson@newcastle.ac.uk)

18 Telephone: 0191 2082014; Fax: 0191 2081101  
19

20  
21  
22 Keywords: Organisation of health services; Risk management; Dementia  
23

24 Word count: 4180  
25  
26  
27  
28  
29  
30  
31  
32  
33  
34  
35  
36  
37  
38  
39  
40  
41  
42  
43  
44  
45  
46  
47  
48  
49  
50  
51  
52  
53  
54  
55  
56  
57  
58  
59  
60

## ABSTRACT

**Objectives:** The aim of this study was to critically explore the views of the public about the acceptability and feasibility of proactive approaches to earlier dementia diagnosis and also identification of people at high risk of dementia.

**Design:** Qualitative study using task group methodology and thematic data analysis.

**Setting:** Task groups were held either at the University (n=5) or a carers' centre (n=1).

**Participants:** A convenience sample of 31 of 54 participants identified by local non-statutory agencies took part in a task group. All were aged between 40 and 80, 21 women and ten men participated.

**Results:** Despite the use of task group methodology, participants expressed limited understandings of dementia and confusion between proactive approaches. Nevertheless, they highlighted a range of potential benefits and limitations of proactive approaches and the ethical issues raised. There was a preference to embed risk assessment within routine health checks, which focused on achieving a healthier lifestyle, rather than specifically on dementia. Participants emphasised the need to ensure informed consent prior to use of proactive approaches and to provide appropriate support. They also suggested alternative approaches that could potentially facilitate the early detection of dementia or reduce risk at a population level.

**Conclusions:** As international policy on dementia shifts towards a prevention agenda there is growing interest in identifying those at risk of developing dementia. This study provides useful insights into the acceptability of the use of such proactive approaches amongst the public. The introduction of proactive approaches to dementia identification raises complex practical and ethical issues, particularly in the context of low public understanding of dementia. The importance of better quality information about dementia (and the likelihood of developing dementia) and provision of psychological support for those undergoing risk assessment were highlighted.

### Strengths and limitations of this study

- Exploring public views on a clinical area where professionals struggle to achieve consensus poses considerable methodical challenges.
- Due to personnel changes, data analysis was conducted by different researchers from those who undertook data collection; this however facilitated a more critical stance to data interpretation.
- Data collection ceased due to time limitations on the study period; theoretically data collection should have continued until data saturation was achieved.
- Our study explored the perceptions of members of the public, none of whom had dementia; abstract views towards proactive approaches may change if personally facing such assessments.

## INTRODUCTION

Dementia has a huge impact on people living with the illness, and their families, and incurs substantial healthcare and societal costs; although more common in older populations, this impact may be greater when dementia occurs earlier in the life course and affects an individual's ability to work and care for their family.<sup>1</sup> Recent findings from large epidemiological studies have shown considerable inconsistencies in incidence and prevalence trends globally.<sup>2-4</sup> A recent systematic review revealed that in high income countries the incidence and prevalence of dementia may be declining, probably due to wide scale health promotion activities; meanwhile in China and parts of Asia, figures are increasing possibly due to worsening cardiovascular risk profiles.<sup>4</sup> Although the evidence base around the medical, social and behavioural factors which influence dementia rates is increasing, this is a complex area.<sup>3</sup> Notwithstanding increasing evidence that dementia prevalence and incidence may be linked to large scale, targeted vascular risk reduction and structured chronic illness care for diseases such as diabetes, in addition to increasing age,<sup>5,6</sup> has led to a shift in global and national policy.<sup>7,8</sup> In the absence of a cure, reducing future dementia burden and costs may be best achieved by greater emphasis on prevention which aims to decrease the future number of people developing the illness.<sup>7</sup> Although general population screening for dementia is not currently advocated,<sup>9</sup> identifying groups at high risk of developing dementia and giving tailored advice to reduce individual risk, has been recommended by the World Health Organisation<sup>10</sup> as a cost effective strategy to reduce the global burden of dementia.<sup>7</sup>

This policy shift has resulted in initiatives such as targeted case finding<sup>11,12</sup> opportunistic assessment to identify possible signs of dementia in a patient at high risk of developing dementia (e.g. those aged 75 years and over; older people with high vascular risk, learning disabilities and Parkinson's disease<sup>13,14</sup>) being introduced into clinical practice albeit with little evidence of effectiveness. In addition this has led to a growing research focus on developing feasible and valid risk assessment tools to determine, and quantify, a person's risk of developing dementia, with the aim of identifying those who may best benefit from early intervention.<sup>15</sup> Despite the development of new dementia risk assessment tools,<sup>16-18</sup> there has been limited research evaluating their acceptability to patients, the public and health care professionals.<sup>19</sup> A systematic review of attitudes to population screening for dementia recommended further qualitative research to explore public and healthcare professional attitudes towards proactive approaches to dementia identification in greater depth.<sup>20</sup> Determining the barriers and facilitators to the use of dementia risk tools in routine practice is as important as ascertaining their validity.<sup>16</sup> The aim of this study was to critically explore, using qualitative methods, the views of members of the public about the acceptability and feasibility of proactive approaches to earlier diagnosis and identification of people at high risk of dementia.

## METHODS

We anticipated that levels of knowledge about approaches to earlier identification of dementia and risk assessment among the general public would be low and therefore used task group methodology.<sup>21,22</sup> Data collection in task groups is similar to focus group methodology but includes the presentation of evidence and information about the topic under discussion.

The content and format of the task group are summarized in Box 1. The presentations, developed from recent literature reviews, aimed to provide a summary of evidence-based information in a lay

1  
2  
3 format to facilitate informed discussion. A pilot task group was facilitated by CD, LN and LR with staff  
4 from Newcastle University with no specific expertise in dementia and refined prior to the main  
5 study. Ethical approval for the project was obtained from Newcastle University. A detailed checklist  
6 of methods using the consolidated criteria for qualitative research (COREQ) guidelines<sup>23</sup> is available  
7 in supplementary file 1.  
8

9  
10 Participants were recruited from two local non-statutory organisations:

11 i) Voice North, a forum for patient/public involvement in research based in the North East of England  
12 (<http://www.voicenorth.org/>) and

13 ii) Age UK, a national voluntary organisation, with local branches, which provides services and  
14 support to older people (<http://www.ageuk.org.uk>).  
15

16 The two organisations used different recruitment approaches: Voice North mailed study information  
17 to their members whilst Age UK advertised the study through posters at meetings of family carers.  
18 Both organisations sought consent from interested participants to pass their contact details to the  
19 research team. Potential participants were sent further study information and then contacted by a  
20 researcher who described the study and answered any questions. Participants were assured that  
21 participation was voluntary and that they could withdraw at any time. Written informed consent  
22 was secured from participants prior to each task group.  
23  
24

### 25 Data collection and analysis

26  
27 A further five task groups, facilitated by CD and LN occurred between December 2015 and July 2016,  
28 each lasting approximately 2 hours. Four were held at Newcastle University and the fifth at an Age  
29 UK carers' group. All task groups, including the pilot, were digitally recorded and transcribed  
30 verbatim; transcripts were checked and anonymised.  
31

32 A thematic approach to analysis was adopted.<sup>24</sup> Initially individual researchers read and re-read one  
33 or two transcripts in detail to become familiar with the data. This stage was particularly important  
34 since changes of personnel meant that the analysis was conducted by different researchers (CB, EM,  
35 LP) to those facilitating the task groups (CD, LN). The researchers noted areas of interest and  
36 potential codes independently and then compared ideas and discussed the data in workshops.  
37  
38

39 Following discussion of emergent themes, we developed separate coding frames for facilitator  
40 presentations and group discussions to avoid imposing ideas from the presentations onto participant  
41 data. These were then applied to further transcripts and discussed collectively in a further data  
42 workshop. Once the coding frames had been agreed, they were applied to all transcripts using Nvivo  
43 11. Output relating to each theme and subtheme was then reviewed and a narrative summary  
44 produced independently (by CB, EM, LP). This was thought to be a more effective way of scrutinising  
45 codes than simply checking coding or having two researchers code the data. The narratives were  
46 then compared and discussed in further data workshops. Finally a combined narrative was produced  
47 for each theme which incorporated the insights and perspectives of different researchers. In a final  
48 stage, each transcript was reread in conjunction with the narrative to identify any missing data or  
49 issues that had not been captured.  
50  
51  
52

53 Quotations indicate the focus group (numbered FG1 to FG6), unique participant identifier and  
54 gender.  
55  
56  
57  
58  
59  
60



## RESULTS

Of the 54 people invited to take part, 31 agreed to participate in a task group; six groups were completed, each with between three and seven participants. The majority of participants were female (n=21, 68%). Around half the sample (n=15, 48%) were aged between 60-69 years; 13 (42%) were between 40-59 years and three (10%) were 70+ years. Eighteen (58%) knew family members or friends with dementia; a small number had personal experience of proactive approaches to identifying dementia.

Four overarching themes were identified, each of which had several subthemes (Table 1). A key theme related to confusion around dementia and proactive approaches. Other themes related to views on proactive approaches, how these might be enacted in practice and alternative approaches that could potentially facilitate the early detection of dementia or reduce risk at a population level.

### Confusion around dementia and proactive approaches

Throughout the task groups there was evidence of limited understandings of dementia and difficulties in distinguishing between approaches such as case finding in high risk groups, risk assessment and genetic screening. We therefore use the generic term '*proactive approaches*' for all of these activities and only differentiate between them where participants were clearly discussing a specific approach. Examples of confusion are illustrated in Box 2 and described below.

#### Limited understandings of dementia

Participants' understanding of dementia varied, even among those with personal experience of the illness. Uncertainty was expressed about the illness trajectory; boundaries between age-related memory decline, mild cognitive impairment and dementia; and the relationship between dementia and specific subtypes e.g. Alzheimer's disease (Box 2).

All task groups discussed the stigma surrounding dementia which was thought to contribute to the lack of understanding of the condition and a reluctance to be open about symptoms. The fear of dementia was linked to the absence of a cure, potential loss of personhood and devastating effects of advanced dementia which were often conveyed through the language used when talking about people with dementia. Nevertheless many participants felt that societal attitudes towards dementia were improving and drew parallels with other once stigmatising conditions, such as cancer.

#### Making sense of proactive approaches

Discussion around specific proactive approaches – case finding, risk assessment and genetic screening – revealed that participants often confused the different methods, sometimes attributing consequences to one approach which related to another. For example, while risk reduction behaviour could reduce the number of people with dementia, case finding would have no impact on prevalence. This distinction was not, however, understood by participants. Participants also voiced opinions which suggested a lack of understanding of specific methods. For example, one participant seemed to think that the case finding method would result in the clear identification of individuals who were going to develop dementia in the future, rather than on identifying those with known risk factors (Box 2).

The role of genes in dementia similarly seemed to be widely misunderstood by participants. While several participants suggested that genetic screening was the most useful of the proactive approaches, their comments seemed to be based on an implicit assumption that a definitive genetic test is available. Few participants seemed to have understood that a deterministic genetic test is currently only relevant to a small number of individuals with Alzheimer's disease. Although this

1  
2  
3 information was included in the presentation, it did not seem to have been understood by  
4 participants many of whom perceived risk of dementia to be largely determined by their personal  
5 family history. One participant, who had previously discussed genetic screening in relation to  
6 another condition, seemed more aware of the nuanced nature of the information, highlighting the  
7 value of personal experience in understanding the issues.  
8

9 There was a widespread tendency for many participants to see the proactive approaches as  
10 providing more definitive information than is the case. The uncertainties surrounding proactive  
11 approaches were challenging for many participants and the importance of help with interpreting  
12 information about risk and how to act on it were stressed.  
13  
14  
15

## 16 **Views on proactive approaches to dementia**

17 Despite their confusion about dementia and proactive approaches, several participants expressed  
18 generally positive views towards the concept of proactive approaches, such as ‘the earlier the  
19 diagnosis the better’, without articulating any specific benefits of different methods. Some  
20 participants valued general information on risk reduction but not detailed information about their  
21 personal risk of developing dementia. Only one participant commented that attitudes to proactive  
22 approaches in the abstract might change if personally faced with such approaches. In light of varied  
23 individual preferences one participant suggested that individuals should be provided with a range of  
24 options (Box 3).  
25  
26

## 27 **Perceived benefits and limitations of proactive approaches to dementia**

28 While some participants questioned the value of proactive approaches for a condition for which no  
29 cure was available, others valued the possibility of reducing risk and/or accessing disease-slowing  
30 treatment (Box 3). Early diagnosis and, to a lesser extent, information on risk were also thought to  
31 facilitate planning for the future, both for the individual affected and – often more importantly –  
32 their families. Participants acknowledged that a significant limitation of proactive approaches was  
33 the fact that information did not automatically result in behaviour change. Regardless of whether or  
34 not individuals chose to act on risk information, some participants felt that providing such  
35 information increased individual choice.  
36  
37

## 38 **Psychological consequences of proactive approaches**

39 Views on the psychological consequences of proactive approaches varied. Participants who had  
40 undergone either formal or informal assessment for memory problems described their relief on  
41 finding that they did not have dementia; others felt that even receiving a diagnosis of dementia  
42 could be a relief. In contrast, other participants felt that proactive approaches while they were  
43 asymptomatic (e.g. genetic screening, risk assessment) could create considerable anxiety (Box 3).  
44  
45

46 Perceptions of dementia were thought to influence the psychological consequences of proactive  
47 approaches; participants felt that people who associated dementia with advanced disease would be  
48 afraid of finding out that they were at risk or had a diagnosis of dementia. While discussions focused  
49 primarily on the psychological impacts of being given information about risk or possible diagnosis of  
50 dementia, the potential of proactive approaches to generate stress and anxiety was also highlighted.  
51  
52  
53  
54  
55  
56  
57  
58  
59  
60

## Practical issues in enacting proactive approaches

This theme explores the suggestions made by participants about how proactive approaches might be integrated into practice and the challenges and questions this may raise.

### Existing and potential new opportunities for implementation

The most common suggestion for introducing proactive approaches was to embed them in routine health check-ups, for example, the annual health review of older adults. Since this approach would focus only on people over a certain age, and dementia can occur in younger adults (e.g. those with learning disabilities), routine risk assessments for younger adults especially those at high risk, were also suggested. This was seen as preferable to introducing a new approach focusing exclusively on dementia and thought by participants to 'normalise' the inclusion of potentially anxiety provoking questions concerning memory loss (Box 4). To address rising GP workload and financial pressures on services, participants suggested that self-completion questionnaires linked to patient records could be used or that other members of the primary care team could be involved. A few participants suggested that alternative venues such as community centres or health buses, would offer more relaxed environments for proactive approaches.

### Barriers to implementation of proactive approaches

Participants identified three main barriers to implementing a proactive approach in primary care: access to GPs; a lack of continuity of care and the perceived reluctance of people with dementia to acknowledge their problems and seek help. Participants highlighted the difficulties in getting appointments with GPs and the limited time available within appointments. While participants felt that discussing concerns about memory problems would be easier with a GP with whom they had an established relationship, many had experienced a lack of continuity of care (Box 4).

In addition to these problems, a number of barriers to early diagnosis were identified. Participants suggested that people with dementia or memory problems might be reluctant to seek help and that even those seen by a GP might present themselves in ways which hid their difficulties. Participants acknowledged the tendency to underestimate alcohol or cigarette consumption and thought that similar behaviour would apply to questions about memory. Concerns were also raised about the ability of people with memory problems to recognise their own difficulties. In light of these concerns, there was a general preference for 'objective' tests (i.e. genetic or blood tests - which are not currently available) which did not rely on self-reported information.

### Ethical considerations

Participants identified a number of ethical issues relating to proactive approaches. Some felt that seeking consent prior to proactive approaches was essential to enable patients to make informed decisions and prevent distress. Participants felt that time and support was needed to ensure that patients fully understood the purpose, potential outcomes and implications of tests and did not simply comply with any questions asked by their GP. Particular concerns were raised about the case finding approach and how this would be integrated into routine consultations (Box 4).

Participants stressed the importance of providing appropriate support services (particularly for people with no close family and limited social networks) prior to introducing proactive approaches. One person with experience of genetic screening highlighted the need for emotional support during the process. A final ethical issue raised during the task groups was the possibility of increasing stigma

1  
2  
3 towards individuals who developed dementia (regardless of whether or not they had taken steps to  
4 reduce the risk of developing the disease). This was particularly evident during some task groups in  
5 which participants spoke pejoratively about individuals who were perceived not to respond  
6 'appropriately' to risk information.  
7

## 10 Alternatives to proactive approaches

11 In addition to discussing integration of proactive approaches in primary care, participants suggested  
12 introducing approaches to target behaviour change at a population level including increasing  
13 awareness of dementia and health promotion or policy initiatives to address risk factors.  
14

### 15 Raising awareness of dementia across the life course

16 Increasing awareness of dementia was seen as key to: reducing stigma; improving integration of  
17 people with dementia; and encouraging people to seek help at an earlier stage. Although awareness  
18 raising was discussed in all but one of the task groups, the emphasis varied markedly between  
19 groups. Awareness raising was generally seen as relevant to the entire population. Existing UK  
20 initiatives such as Dementia Friends<sup>25</sup> and the Prime Minister's Challenge<sup>26</sup> were viewed positively  
21 (Box 5).  
22  
23

24 Initiatives to raise dementia awareness among specific groups including older people and children  
25 were discussed by some groups. Some participants felt that including children was essential to effect  
26 a societal change, others argued against targeting younger generations either to avoid burdening  
27 them with information about dementia or because of perceptions that they were less likely to  
28 engage with an illness strongly related to older age.  
29  
30

31 Having accessible information presented by a credible source was key to awareness raising. One  
32 participant emphasised the importance of avoiding 'medical jargon' and presenting information that  
33 people could relate to. A range of existing opportunities for disseminating information were  
34 suggested including information in GP surgeries, community centres and patient participation  
35 groups.  
36  
37

### 38 Health promotion: policy and practice initiatives

39 A number of aspects of health promotion were discussed by participants including the extent to  
40 which dementia-specific advice was needed and the most appropriate age group to target. There  
41 was a general consensus that health promotion should not focus specifically on dementia, but  
42 prioritise a healthy lifestyle. As with awareness raising, views differed over whether health  
43 promotion campaigns should target children and the role of schools in promoting a healthy lifestyle  
44 (Box 5).  
45  
46

47 Support at a government level was clearly relevant to both awareness raising and health promotion.  
48 However, concerns over the lack of reach of these types of initiatives, led some participants to  
49 suggest that policy changes might be more effective. Taxing certain foods or enforcing limits on the  
50 food industry were most frequently suggested as ways of 'enforcing' a healthier lifestyle. While the  
51 former was welcomed by some, others were concerned about the potential loss of individual  
52 freedom. Concerns were expressed about frequently changing advice on healthy diet and lifestyle  
53 since this created uncertainties over how to act on such information and potentially undermined the  
54 potential value of both health promotion and providing risk information.  
55  
56  
57  
58  
59  
60

## DISCUSSION

Although presentations were embedded within each task group to introduce dementia case finding, dementia risk assessment and genetic screening, these were insufficient to ensure that participants fully understood the key concepts. They were, however, able to comment on the general principles underlying earlier diagnosis and risk assessment for dementia. Earlier diagnosis was generally welcomed by all participants but views varied regarding risk assessment and genetic screening prior to the emergence of symptoms. There was a preference to embed risk assessment within routine health checks, which focused on achieving a healthier lifestyle, rather focusing specifically on dementia. Participants felt that such health checks should be more widely available and provided by a range of health professionals, including nurses. They also emphasised the need to explore preferences and ensure individuals understand what is involved prior to introducing proactive approaches into routine practice. The confusion evident during the task groups confirms the importance of providing accessible information to enable people to make informed decisions. While participants expressed a strong preference for objective measures rather than those relying on self-reported behaviour, this is at odds with the types of risk assessment tools currently available. Although participants also spoke positively about the need for population approaches to promoting healthy lifestyles, some recognised the potential for negative consequences for individuals who did not adopt recommended lifestyle changes.

The confusion amongst our public participants around dementia as a condition, and approaches to its earlier identification, is unsurprising in an area where professionals themselves struggle to achieve consensus<sup>27 28</sup> and expert diagnostic classifications change<sup>29</sup>. However in terms of public attitudes towards earlier diagnosis of dementia, our findings mirror a systematic review which found that both people with and without cognitive impairment wanted to know sooner, rather than later, if they had dementia in order to better prepare for their future<sup>30</sup>. Notwithstanding one of the key challenges around introducing approaches to the earlier identification of people with dementia, and also those at higher risk, is a continuing professional stigma around using the diagnostic label of dementia and opening saying the D word to patients despite increasing public awareness campaigns<sup>31</sup>. Variations in international clinical practice around the use of Mild Cognitive Impairment as a diagnostic label further increase professional inconsistencies<sup>32</sup>.

In terms of identifying those at higher risk of developing dementia, it is interesting to note our participants' preference for such approached to be part of an integrated, holistic approach to maintaining health in mid/late life rather than dementia specific initiatives. Such results lend support to current research evaluating holistic health and wellbeing risk appraisal tools.<sup>33</sup> Earlier qualitative research exploring public knowledge of dementia risk factors and views on risk reduction approaches found reasonably good knowledge of factors which contribute to healthy ageing.<sup>19</sup> Interestingly fear of developing dementia, and the need to improve public knowledge about dementia, were considered major motivators amongst participants towards adopting a healthier lifestyle and improved health behaviours.<sup>19</sup>

Our qualitative study had several limitations. Data collection ceased due to time limitations on the study period; theoretically data collection should have continued until data saturation was achieved. This study explored the perceptions of members of the public, none of whom had dementia. The focus was therefore on case finding, risk assessment/reduction and genetic screening as abstract

1  
2  
3 concepts; participants' views may differ when facing such activities at a personal level. The limited  
4 public understanding of dementia<sup>34</sup> was confirmed in the present study. This suggests that future  
5 studies may need to consider either focusing on a single proactive approach (e.g. genetic screening)  
6 to avoid introducing multiple concepts, or that data collection may need to be conducted over a  
7 longer period to enable participants to become familiar with the concepts and facilitate informed  
8 discussions, for example through citizens' juries.<sup>35</sup> Due to personnel changes, data analysis was  
9 conducted by researchers who had no previous involvement in the project. However, as the  
10 researchers were more distant from the data, this facilitated a more critical stance and the  
11 identification of underlying themes indirectly linked with the study objective.  
12  
13

14  
15 Recent data on the changing incidence and prevalence of dementia internationally<sup>4</sup> has generated  
16 research interest in prevention through controlling risk factors at both individual and population  
17 levels.<sup>36</sup> Whilst interim findings from a randomised controlled trial of a complex, multicomponent  
18 intervention (diet, physical exercise, brain training, vascular risk reduction) targeting individual  
19 dementia risk have revealed promising results,<sup>37</sup> the search for feasible and valid risk assessment  
20 'tools' to identify those who would benefit most from such interventions is ongoing.<sup>15</sup> There has  
21 however been little exploration of the acceptability of such approaches to patients and the public<sup>19</sup>  
22 especially in dementia where public understanding of the illness is still low.<sup>34</sup> With electronic  
23 vascular disease risk assessment tools such as Q-RISK2, which allow healthcare professionals to  
24 quickly calculate an individual's future risk,<sup>38 39</sup> now embedded in routine primary care practice,  
25 similar methods have been used to develop a dementia risk tool.<sup>16</sup> The validity of this tool is  
26 currently under study, it will however be equally important to also explore its acceptability to  
27 patients and healthcare professionals, especially if considering the possibility of patient self-  
28 administered tools in the future.<sup>40</sup> In terms of the implications for practice, our study shows that the  
29 introduction of proactive approaches to dementia identification should also be accompanied by  
30 better quality information about dementia (and the likelihood of developing dementia) and  
31 psychological support for those undergoing risk assessment as well as addressing important public  
32 concerns about the quality and availability of current dementia care.  
33  
34  
35  
36

37  
38 As international policy shifts from finding a 'cure' for dementia to focus on more efficient ways of  
39 future care provision, including reducing numbers with dementia, research opportunities are  
40 beginning to address the prevention as well as 'cure and care' agenda.<sup>36 41</sup> Accurate identification of  
41 an individual's risk of developing dementia, in order to identify those who can most benefit from  
42 appropriate intervention, will be one part of this new agenda; any future research must however  
43 also explore the ethical and personal concerns associated with any newly developed approaches to  
44 determining an individual's future risk of developing dementia. Whilst the usefulness and efficiency  
45 of general lifestyle checks have been questioned,<sup>42</sup> these may be a more acceptable way of  
46 translating dementia risk reduction approaches into usual care. The considerable confusion amongst  
47 our participants around approaches to earlier identification of both people with possible dementia  
48 and those at higher risk of developing the illness in the future suggests an urgent need for greater  
49 education focused on dementia risk and individual risk reduction.  
50  
51

52 **Funding:** This paper presents independent research funded by the National Institute for Health  
53 Research School for Primary Care Research (NIHR SPCR), project number 261. Louise Robinson is  
54 funded by a National Institute for Health Research Professorship (NIHR-RP-011-043). The views  
55  
56  
57  
58  
59

expressed are those of the author(s) and not necessarily those of the NIHR, the National Health Service or the Department of Health.

**Contributor statement:** LR conceived the study and obtained project funding. CD and LN carried out data collection; CB, EM and LP were responsible for data analysis. All authors contributed to drafting of the paper and approved the final manuscript.

**Copyright:** The Corresponding Author has the right to grant on behalf of all authors and does grant on behalf of all authors, [a worldwide licence](#) to the Publishers and its licensees in perpetuity, in all forms, formats and media (whether known now or created in the future), to i) publish, reproduce, distribute, display and store the Contribution, ii) translate the Contribution into other languages, create adaptations, reprints, include within collections and create summaries, extracts and/or, abstracts of the Contribution, iii) create any other derivative work(s) based on the Contribution, iv) to exploit all subsidiary rights in the Contribution, v) the inclusion of electronic links from the Contribution to third party material where-ever it may be located; and, vi) licence any third party to do any or all of the above.

**Competing interest statement:** All authors have completed the Unified Competing Interest form and declared any relevant support from any organisation for the submitted work in the previous three years. Professor Robinson reports grants from the National Institute of Health Research Professorship scheme during the conduct of the study.

**Transparency declaration:** LR affirms that the manuscript is an honest, accurate, and transparent account of the study being reported; that no important aspects of the study have been omitted; and that any discrepancies from the study as planned (and, if relevant, registered) have been explained.

**Patient involvement:** The theme of this research was one of the key research priorities identified by the NIHR Dementia and Neurodegenerative Diseases research network (DeNDRoN) Primary Care Clinical Study Group (PCCSG), an integrated patient, public and researcher group of their last priority setting exercise. Members of this group helped refine the research proposal prior to submission to NIHR.

**Data sharing statement:** No additional data is available.

## REFERENCES

1. Alzheimer's Disease International. World Alzheimer Report 2015: The Global Impact of Dementia: an Analysis of Prevalence, Incidence, Cost and Trends. London: Alzheimer's Disease International, 2015.
2. Wu YT, Fratiglioni L, Matthews FE, et al. Dementia in western Europe: epidemiological evidence and implications for policy making. *Lancet Neurol* 2016;15 doi: 10.1016/s1474-4422(15)00092-7
3. Larson EB, Langa KM. What's the "take home" from research on dementia trends? *PLoS One* 2017;14(3):e1002236. doi: 10.1371/journal.pmed.1002236
4. Prince M, Ali GC, Guerchet M, et al. Recent global trends in the prevalence and incidence of dementia, and survival with dementia. *Alzheimers Res Ther* 2016;8(1):23. doi: 10.1186/s13195-016-0188-8

- 1
- 2
- 3 5. Matthews FE, Arthur A, Barnes LE, et al. A two-decade comparison of prevalence of dementia in
- 4 individuals aged 65 years and older from three geographical areas of England: results of the
- 5 Cognitive Function and Ageing Study I and II. *Lancet* 2013;382(9902):1405-12.
- 6 6. Matthews FE, Stephan BCM, Robinson L, et al. A two decade dementia incidence comparison from
- 7 the Cognitive Function and Ageing Studies I and II. *Nat Commun* 2016;7 doi:
- 8 10.1038/ncomms11398
- 9 7. Alzheimer's Disease International. World Alzheimer Report 2014: Dementia and Risk Redution.
- 10 London: Alzheimer's Disease International 2014.
- 11 8. Department of Health. Prime Minister's challenge on dementia 2020. London, 2015.
- 12 9. UK National Screening Committee. The UK NSC recommendation on screening for dementia. Jan
- 13 2015 2015 [Available from: [www.screening.nhs.uk/dementia](http://www.screening.nhs.uk/dementia) accessed 26/06/2017.
- 14 10. World Health Organization. Draft global action plan on the public health response to dementia
- 15 2016 [Available from:
- 16 [http://www.who.int/mental\\_health/neurology/dementia/action\\_plan\\_consultation/en/](http://www.who.int/mental_health/neurology/dementia/action_plan_consultation/en/)
- 17 accessed 12 July 2017.
- 18 11. Wald N, Morris J. What is case-finding? *Journal of Medical Screening* 1996;3(1):1.
- 19 12. McCartney M. "Case finding" in dementia is simply screening with no evidence of benefit. *BMJ*
- 20 2014;349:g4791.
- 21 13. NHS England. Commissioning for quality and innovation (CQUIN) 2014/15 guidance 2014
- 22 [Available from: [https://www.england.nhs.uk/wp-content/uploads/2014/12/sc-cquin-](https://www.england.nhs.uk/wp-content/uploads/2014/12/sc-cquin-guid.pdf)
- 23 [guid.pdf](https://www.england.nhs.uk/wp-content/uploads/2014/12/sc-cquin-guid.pdf); accessed 28 May 2017.
- 24 14. NHS England. Enhanced Service Specification: Facilitating timely diagnosis and support for people
- 25 with dementia 2015/16 2015 [Available from:
- 26 [https://www.england.nhs.uk/commissioning/wp-](https://www.england.nhs.uk/commissioning/wp-content/uploads/sites/12/2015/03/facilitate-tmly-diag-dementia.pdf)
- 27 [content/uploads/sites/12/2015/03/facilitate-tmly-diag-dementia.pdf](https://www.england.nhs.uk/commissioning/wp-content/uploads/sites/12/2015/03/facilitate-tmly-diag-dementia.pdf) accessed 28 May 2017.
- 28 15. Tang EYH, Harrison S, Errington L, et al. Current developments in dementia risk prediction
- 29 modelling: An updated systematic review. *PLoS One* 2015;10(9):e0136181.
- 30 16. Walters K, Haroon S, Peterson I, et al. Predicting dementia risk in primary care: development
- 31 and validation of the Dementia Risk Score using routinely collected data. *BMC Med*
- 32 2016;14(6) doi: 10.1186/s12916-016-0549-y
- 33 17. Kivipelto M, Ngandu T, Laatikainen T, et al. Risk score for the prediction of dementia risk in
- 34 20 years among middle aged people: a longitudinal, population-based study. *Lancet Neurol*
- 35 2006;5 doi: 10.1016/s1474-4422(06)70537-3
- 36 18. Barnes DE, Covinsky KE, Whitmer RA, et al. Dementia risk indices: A framework for identifying
- 37 individuals with a high dementia risk. *Alzheimers Dement* 2010;6(2):138-41.
- 38 19. Kim S, Sargent-Cox KA, Anstey KJ. A qualitative study of older and middle-aged adults' perception
- 39 and attitudes towards dementia and dementia risk reduction. *Journal of advanced nursing*
- 40 2015;71(7):1694-703. doi: 10.1111/jan.12641 [published Online First: 2015/02/24]
- 41 20. Martin S, Kelly S, Khan A, et al. Attitudes and preferences towards screening for dementia: a
- 42 systematic review of the literature. *BMC geriatrics* 2015;15(1):66.
- 43 21. Hersch J, Jansen J, Barratt A, et al. Women's views on overdiagnosis in breast cancer screening: a
- 44 qualitative study. *BMJ : British Medical Journal* 2013;346 doi: 10.1136/bmj.f158
- 45 22. Mair F, May C, Murray E, et al. Understanding the implementation and integration of E-Health
- 46 services. London: NIHR, 2010.
- 47 23. Tong A, Sainsbury P, Craig J. Consolidated criteria for reporting qualitative research (COREQ): a
- 48 32-item checklist for interviews and focus groups. *International journal for quality in health*
- 49 *care* 2007;19(6):349-57.
- 50 24. Braun V, Clarke V. Using thematic analysis in psychology. *Qualitative research in psychology*
- 51 2006;3(2):77-101.
- 52 25. Alzheimer's Society. Dementia Friends [Available from: <https://www.dementiafriends.org.uk/>
- 53 accessed 26/06/2017.
- 54
- 55
- 56
- 57
- 58
- 59
- 60



- 1
- 2
- 3 26. Department of Health. Prime Minister's Challenge on Dementia 2020. London, UK: Department
- 4 of Health 2015.
- 5 27. Peterson RC, Caracciolo B, Brayne C, et al. Mild cognitive impairment: a concept in evolution.
- 6 *Journal of Internal Medicine* 2014;275(3):214-28. doi: 10.1111/joim.12190
- 7 28. Tang EY, Brayne C, Albanese E, et al. Mild cognitive impairment definitions: more evolution than
- 8 revolution. *Neurodegenerative Disease Management* 2015;5(1):11-7. doi:
- 9 10.2217/nmt.14.42
- 10 29. Sachdev PS, Blacker D, Blazer DG, et al. Classifying neurocognitive disorders: the DSM-5 approach.
- 11 *Nature Reviews Neurology* 2014;10(11):634-42. doi: 10.1038/nrneuro.2014.181
- 12 30. Van den Dungen P, van Kuijk L, van der Wouden J, et al. Preferences regarding disclosure of a
- 13 diagnosis of dementia: a systematic review. *International Psychogeriatrics*
- 14 2014;26(10):1603-18. doi: 10.1017/S1041610214000969
- 15 31. Robinson L, Gemski A, Abley C, et al. The transition to dementia—individual and family
- 16 experiences of receiving a diagnosis: a review. *International Psychogeriatrics*
- 17 2011;23(07):1026-43.
- 18 32. Whitehouse PJ, George D. Further limits on labels for cognitive impairment: can we diagnose
- 19 what we don't know? *The American Journal of Geriatric Psychiatry* 2011;19(11):984. doi:
- 20 <http://dx.doi.org/10.1097/JGP.0b013e3182330fef>
- 21 33. Walters K, Kharicha K, Goodman C, et al. Promoting independence, health and wellbeing for
- 22 older people: a feasibility study of computer-aided health and social risk appraisal system in
- 23 primary care. *BMC Fam Pract* 2017;18(47) doi: 10.1186/s12875-017-0620-6
- 24 34. Mitchell S, Ridley SH, Sancho RM, et al. The future of dementia risk reduction research: barriers
- 25 and solutions. *J Public Health* 2016:1-7. doi: 10.1093/pubmed/fdw103
- 26 35. Lenaghan Jo CA. Citizens' Juries: Theory into Practice. London: Institute for Public Policy Research
- 27 1997.
- 28 36. Anstey KK, Eramudugolla R, Hosking DE, et al. Bridging the translation gap: from dementia risk
- 29 assessment to advice on risk reduction. *J Prev Alzheimers Dis* 2015;2(3):189-98.
- 30 37. Ngandu T, Lehtisalo J, Solomon A, et al. A 2 year multidomain intervention of diet, exercise,
- 31 cognitive training, and vascular risk monitoring versus control to prevent cognitive decline in
- 32 at-risk elderly people (FINGER): a randomised controlled trial. *Lancet*;385(9984):2255-63. doi:
- 33 10.1016/S0140-6736(15)60461-5
- 34 38. Hippisley-Cox J, Coupland C, Vinogradova Y, et al. Predicting cardiovascular risk in England and
- 35 Wales: prospective derivation and validation of QRISK2. *BMJ* 2008;336(7659):1475-82. doi:
- 36 10.1136/bmj.39609.449676.25
- 37 39. Hippisley-Cox J, Coupland C, Vinogradova Y, et al. Performance of the QRISK cardiovascular risk
- 38 prediction algorithm in an independent UK sample of patients from general practice: A
- 39 validation study. *Heart* 2008;94(1):34-9. doi: 10.1136/hrt.2007.134890
- 40 40. Nolan T, Dack C, Pal K, et al. Patient reactions to a web-based cardiovascular risk calculator in
- 41 type 2 diabetes: a qualitative study in primary care. *Br J Gen Pract* 2015;65(632):e152-60. doi:
- 42 10.3399/bjgp15X683953
- 43 41. Birdi R, Stephan BC, Robinson L, et al. Can we influence the epidemiology of dementia?
- 44 Perspectives from population-based studies. *Postgrad Med J* 2015;91(1081):651-4. doi:
- 45 10.1136/postgradmedj-2015-133244
- 46 42. Frost H, Haw S, Frank J. Promoting health and well-being in later life: interventions in primary
- 47 care and community settings. Edinburgh: Chief Scientist Office, 2011.
- 48
- 49
- 50
- 51
- 52
- 53
- 54
- 55
- 56
- 57
- 58
- 59
- 60

**Table 1: Overview of themes and subthemes**

|                                                                                                                                                                                                              |
|--------------------------------------------------------------------------------------------------------------------------------------------------------------------------------------------------------------|
| Confusion around dementia and proactive approaches                                                                                                                                                           |
| <ul style="list-style-type: none"><li>• Limited understandings of dementia</li><li>• Making sense of proactive approaches</li></ul>                                                                          |
| Views on proactive approaches to dementia                                                                                                                                                                    |
| <ul style="list-style-type: none"><li>• Perceived benefits and limitations of proactive approaches</li><li>• Psychological consequences of proactive approaches</li></ul>                                    |
| Practical issues in enacting proactive approaches to dementia                                                                                                                                                |
| <ul style="list-style-type: none"><li>• Existing and potential new opportunities for implementation</li><li>• Barriers to implementation of proactive approaches'</li><li>• Ethical considerations</li></ul> |
| Alternatives to proactive approaches to dementia                                                                                                                                                             |
| <ul style="list-style-type: none"><li>• Raising awareness of dementia across the life course</li><li>• Health promotion: policy and practice initiatives</li></ul>                                           |

**Box 1: Task group content and format**

1. Pre task group questionnaire (participant demographic details; personal experience of dementia; knowledge about dementia risk factors)
2. Presentation 1: Dementia assessment and diagnosis
  - Introduction to dementia and the process of diagnostic assessment: ‘facts and figures’ – numbers living with dementia; knowledge to date regarding cause; clinical presentation; dementia sub-types; clinical assessment processes.
  - Case finding in high risk groups; factors contributing to dementia; groups at high risk; pro-active methods for earlier detection of dementia e.g. case finding.
3. Group discussion 1
4. Presentation 2: Dementia prevention and risk assessment
  - Risk assessment - risk factors for dementia
  - Risk assessment tools - general process of disease risk assessment and risk assessment tools; specific dementia risk assessment tools.
  - Prevention approaches: genetic screening and potential future treatments e.g. drugs/vaccines
5. Group discussion 2
6. Post task group questionnaire (knowledge about dementia risk factors)

**Box 2: Confusion around dementia and proactive approaches****Limited understandings of dementia**

'Now I don't know to what degree you suffer Alzheimer's, can you get milder cases, more severe cases? Do people just amble along with mild cases of dementia?' [FG3, P17, female]

'Then you say 'dementia', what do you mean? I know that's stupid but my partner's got mild cognitive impairment which could be classified as dementia, because he's got memory problems, or it might be mild cognitive impairment, which is it?' [FG2, P5, female]

'Dementia as far as I'm aware, dementia is one form of Alzheimer's disease' [FG2, P6, male]

'I think language is very powerful. You know, when I was younger, people who had memory problems, do you know, they were a bit wandered you know, they were just getting a bit worn out, you know. The language was kind, but, you talk about dementia, dementia, demented, crazy, and that, that, that encourages people to flee from it, to conceal it and not to share it-' [FG2, P10, male]

**Making sense of proactive approaches**

'Does it not smack a bit of Big Brother if you're having a register? 'This person is going to get dementia. This person is going to get dementia. This person isn't.' It smacks of Big Brother sort of...' [FG5, P24, male]

'I don't really know what genetic testing amounts to. It was mooted to me once because I've got an eye condition and it might be genetic, that it was possible to have that done. I was advised that it's quite a big process to go through and it might not give you anything clear at the end of the day. '[FG6, P31, male]

'I mean you really can't prove that if you're like say - do more exercise, change your diet and all that, will it stop you getting that?' [FG3, P14, male]

'And then it [health check] came back with a letter, with a big long 'score this for this, and this for that' but it didn't explain what those numbers meant.' [FG1. P4, female]

**Box 3: Views on proactive approaches****General views on proactive approaches**

'I don't want to know that I might be going to get it. I don't mind being told that, "If you do this, this and this you're less likely to have it", just as with heart disease or anything like that.' [FG3, P11, female]

'But perhaps you need different ways, different tools, because what we seem to be saying is that different things suit different people.' [FG2, P9, female]

**Perceived benefits and limitations of proactive approaches**

'But I think the point here is if you've got high cholesterol there's a blood test that shows that and the doctor can do something about it. If you're going to develop dementia it's no good telling me unless you can cure it, I can do something myself about it or you can help me.' [FG3, P16, male]

'If there's medication which can slow it down, delay it or whatever and I could have that medication I would be silly to not have it.' [FG5, P27, female]

'...with dementia, I think I would like to know so I could get my life ironed out for my kids, because I wouldn't like to leave them in dire straits.' [FG4, P22, female]

'I think an early diagnosis might be quite frightening at the time but I think it's only fair on your family so that they know what's happening for you and for them to prepare themselves as well for what might happen, if they would be prepared to look after you or if they feel you might need to go into care' [FG3, P17, female]

'The majority of people will say, "It will never happen to me anyway. I don't need that test. I only smoke 20 fags a day and my neighbour smokes 30 so he's far more likely to..." [FG3, P16, male]

'You can choose to ignore it, but you've been given the information and it's your choice what you do with it, whereas at the minute, it's not there.' [FG6, P30, female]

**Psychological consequences of proactive approaches**

'But there was no sign of it [dementia] in my brain at all. Now I think that was fantastic. I now know that there was no sign of it and that's really, really reassuring.' [FG5, P23, female]

'Do I really want to have the worry about me? It may happen. If I had symptoms of it, then like yourself I would go and probably find out. But I don't feel like I've got symptoms of it, so I don't really want to know that I could have it when I haven't got it, when I feel...' [FG5, P28, female]

'I think there are a percentage of people who wouldn't want to know because they're so scared of the diagnosis because they've seen what happens to people. They've seen relatives go into nursing homes and the eventual outcome.' [FG6, P29, female]

'I did some of these cognitive tests on the internet and I got myself really upset and stressed when I thought I wasn't hitting the time allowed. I dropped out of that because I felt under pressure.' [FG3, P17, female]

**Box 4: Existing and potential new opportunities for implementation****Existing and potential new opportunities for implementation**

'My doctors have started to do an annual review of people, so on their birthday they call you in, you go and see the practice nurse and they give you an MOT certificate, basically. So it could be at that point that if memory things were introduced to that kind of review... That's just a standard thing so everybody understands that they're going to go through that test, or whatever, then I think incorporating in that could help.' [FG3, P11, female]

'So you could have that health check on all those things, the blood pressure and if that regardless of age, so you don't have to hit the 60 box, if that health check put you in those risk factors then there's follow-up and questions asked about memory' [FG4, P20, female]

'You can go into your doctor's surgery and you don't necessarily have to see a doctor now do you? No, you're seeing a practice nurse. It could be at that level that the tests are done and the risks are quoted to you. Then if you felt that you needed to see a doctor to explain it more or to give you better information...' [FG3, P16, male]

'I think rather than saying, "Oh, go to the GPs." I haven't been there for three years and I don't need to go there now. Things popping up, but things more widespread across the community so that people will come across them more frequently. In what shape or form, I suppose that's debateable' [FG6, P31, male]

**Barriers to implementing proactive approaches**

'It's getting appointments to see them, that's the problem. From personal experience, trying to get to see a GP, you just give up.' [FG6, P31, male]

'They're too busy. You know, you don't get enough time to do anything like that in my GP's surgery. You never, ever get it, because you don't get enough minutes' appointment.' [FG1, P4, female]

'There's none of the continuity like when you were smaller; we had a family doctor who was there for everybody's health for 50 years.' [FG5, P27, female]

'I do tend to try and- well, I do think I tell the truth in these questionnaires. But you may think, you've got a different idea, perhaps, than somebody else. You might under-exaggerate, or over-exaggerate. You think you're telling the truth, but actually...' [FG1, P1, female]

'People with dementia, in the early stages, will hide the fact that they've got a problem and can sometimes fool quite a lot of people a lot of the time.' [FG3, P11, female]

'It also requires people to have insight into their memory problem and often people just haven't, have they?' [FG2, P9, female]

**Ethical considerations**

'As long as it's an informed consent, but, I think, often [patients] will go with what the GP says because they trust their GP so it's a big responsibility.' [FG2, P5, female]

'You're going to get a lot of people who will go to the GP for a completely different reason and the GP might turn round and say, "Do you think you have a memory problem?" You think, "Well, I've come about my in-growing toenail. No, I don't. I'm not here about that."' [FG6, P29, female]

'I think you would need counselling [...] yes, but then the whole thing and then it hits you on an

1  
2  
3 emotional level and that's what you need help.' [FG2, P8, female]  
4

5 'If you are going to put yourself forward to identify your risk of dementia, then you want to know what  
6 will happen if you are at high risk of dementia. What services are out there, what's the support,  
7 available and if there's nothing available for you, you might think, "Well, what's the point of knowing."  
8 [FG2, P9, female]  
9

10 'There's always going to be a percentage of the population, it's whether it's to do with health, whether  
11 it's to do with whatever, who just don't give a s\*\*\*. But also - but that impacts upon us, because  
12 eventually we're going to have to pay for the people who don't give a s\*\*\*. [FG4, P20, female]'  
13  
14  
15  
16  
17  
18  
19  
20  
21  
22  
23  
24  
25  
26  
27  
28  
29  
30  
31  
32  
33  
34  
35  
36  
37  
38  
39  
40  
41  
42  
43  
44  
45  
46  
47  
48  
49  
50  
51  
52  
53  
54  
55  
56  
57  
58  
59  
60

For peer review only

**Box 5: Alternatives to proactive approaches****Raising awareness of dementia across the life course**

'I mean, the dementia friends thing [...] if you can get everybody, you can get kids at school to understand how they can best talk to Granny, how they can react to somebody in the street who is wandering or who's talking to themselves, how to be nice to the person, how to support them.'  
[FG2, P7, female]

'I think acceptance of it, even it was part of primary/secondary, actually getting it in the schools and getting it at that young age to understand that they're not that person. It's just part of a condition they've got, and acceptance.' [FG6, P30, female]

'Having taught in an FE college and taught health and social care subjects, 16 to 19 year olds think they're going to live forever. When you try to talk to them about smoking and drinking, it's just over the top of their head. I don't know. Even if they've had experience of grandparents with dementia they think, "It's never going to happen to me and I'm going to live forever and who cares what happens to me when I get to 65?"' [FG6, P29, female]

**Health promotion: policy and practice initiatives**

'There's a general advice there that's not specific to dementia [...] there's a generic thing going on about 'well if you want to keep your heart going, you need to give up smoking'. It's the same things. So maybe we need to actually pull dementia or the risks of dementia into that general health and wellbeing better than perhaps we're currently doing.' [FG4, P19, male]

'The schools have enough on their plate with directives coming to say, "You must teach X amount of maths, English and science" and that's push, push, push. They don't leave a lot of time. They've taken less PE. So schools don't have that facility' [FG3, P12, female]

'Not everybody is going to get that education, not everybody is going to listen to that education. And there's parental influence on it, social influence on it, economic influence on it. So I think you've got sort of - I believe very strongly in personal choice, but I think there's a point where you've got to look at it more on a sort of society level.' [FG4, P18, male]

With healthy eating, at least now they're going to put this sugar tax on, but I would put tax on a load of other things like that. [FG3, P14, male]

'The trouble is with these diets, again, you get it in the papers, "Don't drink tea, because it's got this... Don't drink coffee because it's got that." And then a few months down the line, "Oh, tea's good for you. Coffee is good for you." What do you believe?' [FG4, P22, female]



## COREC checklist

### Domain 1: Research team and reflexivity

| Personal Characteristics |                                                                                 |                                                                                                                                                                                                                                                                                                                                                                                                                                                                      |
|--------------------------|---------------------------------------------------------------------------------|----------------------------------------------------------------------------------------------------------------------------------------------------------------------------------------------------------------------------------------------------------------------------------------------------------------------------------------------------------------------------------------------------------------------------------------------------------------------|
| 1.                       | Interviewer/facilitator<br>Which author/s were involved in data collection?     | CD & LN (all task groups); LR (pilot task group only)                                                                                                                                                                                                                                                                                                                                                                                                                |
| 2.                       | Credentials<br>What were the researcher's credentials? E.g. PhD, MD             | CB - MSc<br>CD – PhD<br>EM – PhD<br>LN – MclinRes<br>LP - BSc<br>LR – MD, FRCGP                                                                                                                                                                                                                                                                                                                                                                                      |
| 3.                       | Occupation<br>What was their occupation at the time of the study?               | CB - senior research associate<br>CD - research associate<br>EM - research associate<br>LN - NIHR Academic Clinical Fellow<br>LP - research assistant<br>LR - Professor of Primary Care and Ageing                                                                                                                                                                                                                                                                   |
| 4.                       | Gender<br>Was the researcher male or female?                                    | All researchers were female                                                                                                                                                                                                                                                                                                                                                                                                                                          |
| 5.                       | Experience and training<br>What experience or training did the researcher have? | All researchers involved in data collection completed GCP training.<br>CB and CD are experienced qualitative researchers with extensive experience in dementia research.<br>LN is a general practitioner and undertook this study whilst studying for a Masters' degree which included training in qualitative methods.<br>EM is a health psychologist with previous qualitative experience gained during her PhD.<br>LP is an adult nurse with research experience. |

|                                       |                                                                                                                                                                          |                                                                                                                                                                |
|---------------------------------------|--------------------------------------------------------------------------------------------------------------------------------------------------------------------------|----------------------------------------------------------------------------------------------------------------------------------------------------------------|
|                                       |                                                                                                                                                                          | LR is an experienced dementia researcher and general practitioner                                                                                              |
| <b>Relationship with participants</b> |                                                                                                                                                                          |                                                                                                                                                                |
| 6.                                    | Relationship established<br>Was a relationship established prior to study commencement?                                                                                  | Participants in the pilot task group were known to the researchers as work colleagues; there was no prior relationship with participants in other task groups. |
| 7.                                    | Participant knowledge of the interviewer<br>What did the participants know about the researcher? e.g. personal goals, reasons for doing the research                     | Researchers discussed their interest in exploring views on case finding, risk assessment and genetic screening in dementia.                                    |
| 8.                                    | Interviewer characteristics<br>What characteristics were reported about the interviewer/facilitator? e.g. Bias, assumptions, reasons and interests in the research topic | None                                                                                                                                                           |

## Domain 2: study design

|                              |                                                                                                                                                                                                   |                                                                            |
|------------------------------|---------------------------------------------------------------------------------------------------------------------------------------------------------------------------------------------------|----------------------------------------------------------------------------|
| <b>Theoretical framework</b> |                                                                                                                                                                                                   |                                                                            |
| 9.                           | Methodological orientation and theory<br>What methodological orientation was stated to underpin the study? e.g. grounded theory, discourse analysis, ethnography, phenomenology, content analysis | Interpretive approach and thematic analysis                                |
| <b>Participant selection</b> |                                                                                                                                                                                                   |                                                                            |
| 10.                          | Sampling<br>How were participants selected? e.g. purposive, convenience, consecutive, snowball                                                                                                    | Convenience                                                                |
| 11.                          | Method of approach<br>How were participants approached? e.g. face-to-face, telephone, mail, email                                                                                                 | Face to face & poster inviting participation (Age UK); mail (Voice North). |
| 12.                          | Sample size<br>How many participants were in the study?                                                                                                                                           | 31                                                                         |

|                 |                                                                                                            |                                                                                                                                                                  |
|-----------------|------------------------------------------------------------------------------------------------------------|------------------------------------------------------------------------------------------------------------------------------------------------------------------|
| 13.             | Non-participation<br>How many people refused to participate or dropped out? Reasons?                       | 23 people were approached and either were not interested or did not attend the focus group. No information on reasons for non-participation is available.        |
| Setting         |                                                                                                            |                                                                                                                                                                  |
| 14.             | Setting of data collection<br>Where were the data collected? e.g. home, clinic, workplace                  | University (5 task groups); carers' centre (1 task group)                                                                                                        |
| 15.             | Presence of non-participants<br>Was anyone else present besides the participants and researchers?          | No. One task group was facilitated by three team members (CD, LN, LR); the remaining groups were facilitated by CD and LN.                                       |
| 16.             | Description of sample<br>What are the important characteristics of the sample? e.g. demographic data, date | Important characteristics for participants were gender, age and experience of dementia.                                                                          |
| Data collection |                                                                                                            |                                                                                                                                                                  |
| 17.             | Interview guide<br>Were questions, prompts, guides provided by the authors? Was it pilot tested?           | A structured powerpoint presentation was given by the facilitators to each task group and specific prompts for discussion were included within the presentation. |
| 18.             | Repeat interviews<br>Were repeat interviews carried out? If yes, how many?                                 | No                                                                                                                                                               |
| 19.             | Audio/visual recording<br>Did the research use audio or visual recording to collect the data?              | Yes, audio recording and full transcription                                                                                                                      |
| 20.             | Field notes<br>Were field notes made during and/or after the interview or focus group?                     | Yes                                                                                                                                                              |
| 21.             | Duration<br>What was the duration of the interviews or focus group?                                        | The duration of the task groups ranged from 51 to 120 minutes with a median of 105 minutes (mean 95 minutes)                                                     |
| 22.             | Data saturation<br>Was data saturation discussed?                                                          | Yes, during our on-going analysis.                                                                                                                               |
| 23.             | Transcripts returned                                                                                       |                                                                                                                                                                  |

|  |                                                                          |    |
|--|--------------------------------------------------------------------------|----|
|  | Were transcripts returned to participants for comment and/or correction? | No |
|--|--------------------------------------------------------------------------|----|

### Domain 3: analysis and findings

| Data analysis |                                                                                                                                                           |                                                                                |
|---------------|-----------------------------------------------------------------------------------------------------------------------------------------------------------|--------------------------------------------------------------------------------|
| 24.           | Number of data coders<br>How many data coders coded the data?                                                                                             | CB, EM & LP were involved in developing the coding frame.<br>EM coded the data |
| 25.           | Description of the coding tree<br>Did authors provide a description of the coding tree?                                                                   | Yes                                                                            |
| 26.           | Derivation of themes<br>Were themes identified in advance or derived from the data?                                                                       | Derived from the data                                                          |
| 27.           | Software<br>What software, if applicable, was used to manage the data?                                                                                    | NVivo 11                                                                       |
| 28.           | Participant checking<br>Did participants provide feedback on the findings?                                                                                | No                                                                             |
| Reporting     |                                                                                                                                                           |                                                                                |
| 29.           | Quotations presented<br>Were participant quotations presented to illustrate the themes / findings? Was each quotation identified? e.g. participant number | Yes                                                                            |
| 30.           | Data and findings consistent<br>Was there consistency between the data presented and the findings?                                                        | Yes                                                                            |
| 31.           | Clarity of major themes<br>Were major themes clearly presented in the findings?                                                                           | Yes                                                                            |
| 32.           | Clarity of minor themes<br>Is there a description of diverse cases or discussion of minor themes?                                                         | Yes                                                                            |

# BMJ Open

## Proactive approaches to identifying dementia and dementia risk; a qualitative study of public attitudes and preferences

|                                 |                                                                                                                                                                                                                                                                                                                                                                                                                                                             |
|---------------------------------|-------------------------------------------------------------------------------------------------------------------------------------------------------------------------------------------------------------------------------------------------------------------------------------------------------------------------------------------------------------------------------------------------------------------------------------------------------------|
| Journal:                        | <i>BMJ Open</i>                                                                                                                                                                                                                                                                                                                                                                                                                                             |
| Manuscript ID                   | bmjopen-2017-018677.R3                                                                                                                                                                                                                                                                                                                                                                                                                                      |
| Article Type:                   | Research                                                                                                                                                                                                                                                                                                                                                                                                                                                    |
| Date Submitted by the Author:   | 07-Dec-2017                                                                                                                                                                                                                                                                                                                                                                                                                                                 |
| Complete List of Authors:       | Robinson, Louise; Institute for Health and Society, Newcastle University<br>Dickinson, Claire; Institute for Health and Society, Newcastle University<br>Magklara, Eleni; Institute for Health and Society, Newcastle University<br>Newton, Lisa; Institute for Health and Society, Newcastle University<br>Prato, Laura; Institute for Health and Society, Newcastle University<br>Bamford, Claire; Institute for Health and Society, Newcastle University |
| <b>Primary Subject Heading</b>: | Mental health                                                                                                                                                                                                                                                                                                                                                                                                                                               |
| Secondary Subject Heading:      | General practice / Family practice, Global health, Public health                                                                                                                                                                                                                                                                                                                                                                                            |
| Keywords:                       | Organisation of health services < HEALTH SERVICES ADMINISTRATION & MANAGEMENT, Risk management < HEALTH SERVICES ADMINISTRATION & MANAGEMENT, Dementia < NEUROLOGY                                                                                                                                                                                                                                                                                          |
|                                 |                                                                                                                                                                                                                                                                                                                                                                                                                                                             |

SCHOLARONE™  
Manuscripts

Peer Review Only

1  
2  
3 **Proactive approaches to identifying dementia and dementia risk; a**  
4 **qualitative study of public attitudes and preferences**  
5  
6  
7  
8

9 Louise Robinson, Claire Dickinson, Eleni Magklara, Lisa Newton, Laura Prato, Claire Bamford.  
10  
11 Institute of Health & Society, Newcastle University, Newcastle upon Tyne, UK.  
12

13  
14 Corresponding author and Guarantor for the paper: Louise Robinson, Institute of Health & Society,  
15 Newcastle University, Campus for Ageing and Vitality, Biomedical Research Building, Newcastle upon  
16 Tyne, NE4 5PL.  
17 Email: [a.l.robinson@newcastle.ac.uk](mailto:a.l.robinson@newcastle.ac.uk)  
18 Telephone: 0191 2082014; Fax: 0191 2081101  
19  
20

21  
22 Keywords: Organisation of health services; Risk management; Dementia  
23

24 Word count: 4576  
25  
26  
27  
28  
29  
30  
31  
32  
33  
34  
35  
36  
37  
38  
39  
40  
41  
42  
43  
44  
45  
46  
47  
48  
49  
50  
51  
52  
53  
54  
55  
56  
57  
58  
59  
60

## ABSTRACT

**Objectives:** The aim of this study was to critically explore the views of the public about the acceptability and feasibility of proactive approaches to earlier dementia diagnosis and also identification of people at high risk of dementia.

**Design:** Qualitative study using task group methodology and thematic data analysis.

**Setting:** Task groups were held either at the University (n=5) or a carers' centre (n=1).

**Participants:** A convenience sample of 31 of 54 participants identified by local non-statutory agencies took part in a task group. All were aged between 40 and 80, 21 women and ten men participated.

**Results:** Despite the use of task group methodology, participants expressed limited understandings of dementia and confusion between proactive approaches. Nevertheless, they highlighted a range of potential benefits and limitations of proactive approaches and the ethical issues raised. There was a preference to embed risk assessment within routine health checks, which focused on achieving a healthier lifestyle, rather than specifically on dementia. Participants emphasised the need to ensure informed consent prior to use of proactive approaches and to provide appropriate support. They also suggested alternative approaches that could potentially facilitate the early detection of dementia or reduce risk at a population level.

**Conclusions:** As international policy on dementia shifts towards a prevention agenda there is growing interest in identifying those at risk of developing dementia. This study provides useful insights into the acceptability of the use of such proactive approaches amongst the public. The introduction of proactive approaches to dementia identification raises complex practical and ethical issues, particularly in the context of low public understanding of dementia. The importance of better quality information about dementia (and the likelihood of developing dementia) and provision of psychological support for those undergoing risk assessment were highlighted.

### Strengths and limitations of this study

- Exploring public views on a clinical area where professionals struggle to achieve consensus poses considerable methodical challenges.
- Due to personnel changes, data analysis was conducted by different researchers from those who undertook data collection; this however facilitated a more critical stance to data interpretation.
- Data collection ceased due to time limitations on the study period; theoretically data collection should have continued until data saturation was achieved.
- Our study explored the perceptions of members of the public, none of whom had dementia; abstract views towards proactive approaches may change if personally facing such assessments.

## INTRODUCTION

Dementia has a huge impact on people living with the illness and their families and incurs substantial healthcare and societal costs; although more common in older populations, this impact may be greater when dementia occurs earlier in the life course and affects an individual's ability to work and care for their family.<sup>1</sup> Recent findings from large epidemiological studies have shown considerable inconsistencies in incidence and prevalence trends globally.<sup>2-4</sup> A recent systematic review revealed that in high income countries the incidence and prevalence of dementia may be declining, probably due to wide scale health promotion activities; meanwhile in China and parts of Asia, figures are increasing possibly due to worsening cardiovascular risk profiles.<sup>4</sup> Although the evidence base around the medical, social and behavioural factors which influence dementia rates is increasing, this is a complex area.<sup>3</sup> Notwithstanding increasing evidence that dementia prevalence and incidence may be linked to large scale, targeted vascular risk reduction and structured chronic illness care for diseases such as diabetes, in addition to increasing age,<sup>5,6</sup> has led to a shift in global and national policy.<sup>7,8</sup> In the absence of a cure, reducing future dementia burden and costs may be best achieved by greater emphasis on prevention which aims to decrease the future number of people developing the illness.<sup>7</sup> Although general population screening for dementia is not currently advocated,<sup>9</sup> identifying groups at high risk of developing dementia and giving tailored advice to reduce individual risk, has been recommended by the World Health Organisation<sup>10</sup> as a cost effective strategy to reduce the global burden of dementia.<sup>7</sup>

This policy shift has resulted in initiatives such as targeted case finding,<sup>11,12</sup> opportunistic assessment to identify possible signs of dementia in patients at high risk for example, older people aged over 75 years; those with a predisposing medical condition e.g. Parkinson's disease; very high vascular risk in middle age and younger adults (i.e. post head injury or Downs syndrome).<sup>13,14</sup> However such schemes have been introduced into practice albeit with little evidence of effectiveness. In addition this has led to a growing research focus on developing feasible and valid risk assessment tools to determine, and quantify, a person's risk of developing dementia, with the aim of identifying those who may best benefit from early intervention.<sup>15</sup> Despite the development of new dementia risk assessment tools,<sup>16-18</sup> there has been limited research evaluating their acceptability to patients, the public and health care professionals.<sup>19</sup> A systematic review of attitudes to population screening for dementia recommended further qualitative research to explore public and healthcare professional attitudes towards proactive approaches to dementia identification in greater depth.<sup>20</sup> Determining the barriers and facilitators to the use of dementia risk tools in routine practice is as important as ascertaining their validity.<sup>16</sup> The aim of this study was to critically explore, using qualitative methods, the views of members of the public about the acceptability and feasibility of proactive approaches to earlier diagnosis and identification of people at high risk of dementia.

## METHODS

We anticipated that levels of knowledge about approaches to earlier identification of dementia and risk assessment among the general public would be low and therefore used task group methodology.<sup>21,22</sup> Data collection in task groups is similar to focus group methodology but includes out the topic under discussion.



1  
2  
3 The content and format of the task group are summarized in Box 1. The presentations, developed  
4 from recent literature reviews, aimed to provide a summary of evidence-based information in a lay  
5 format to facilitate informed discussion. A pilot task group was facilitated by CD, LN and LR with staff  
6 from Newcastle University with no specific expertise in dementia and refined prior to the main  
7 study. Ethical approval for the project was obtained from Newcastle University. A detailed checklist  
8 of methods using the consolidated criteria for qualitative research (COREQ) guidelines<sup>23</sup> is available  
9 in supplementary file 1.  
10  
11

12 Participants were recruited from two local non-statutory organisations:

- 13 i) Voice North, a forum for patient/public involvement in research based in the North East of England  
14 (<http://www.voicenorth.org/>) and  
15  
16 ii) Age UK, a national voluntary organisation, with local branches, which provides services and  
17 support to older people (<http://www.ageuk.org.uk>).  
18

19 The two organisations used different recruitment approaches: Voice North mailed study information  
20 to their members whilst Age UK advertised the study through posters at meetings of family carers.  
21 Both organisations sought consent from interested participants to pass their contact details to the  
22 research team. Potential participants were sent further study information and then contacted by a  
23 researcher who described the study and answered any questions. Participants were assured that  
24 participation was voluntary and that they could withdraw at any time. Written informed consent  
25 was secured from participants prior to each task group.  
26  
27

### 28 Data collection and analysis

29 A further five task groups, facilitated by CD and LN occurred between December 2015 and July 2016,  
30 each lasting approximately 2 hours. Four were held at Newcastle University and the fifth at an Age  
31 UK carers' group. All task groups, including the pilot, were digitally recorded and transcribed  
32 verbatim; transcripts were checked and anonymised.  
33  
34

35 A thematic approach to analysis was adopted.<sup>24</sup> Initially individual researchers read and re-read one  
36 or two transcripts in detail to become familiar with the data. This stage was particularly important  
37 since changes of personnel meant that the analysis was conducted by different researchers (CB, EM,  
38 LP) to those facilitating the task groups (CD, LN). The researchers noted areas of interest and  
39 potential codes independently and then compared ideas and discussed the data in workshops.  
40  
41

42 Following discussion of emergent themes, we developed separate coding frames for facilitator  
43 presentations and group discussions to avoid imposing ideas from the presentations onto participant  
44 data. These were then applied to further transcripts and discussed collectively in a further data  
45 workshop. Once the coding frames had been agreed, they were applied to all transcripts using Nvivo  
46 11. Output relating to each theme and subtheme was then reviewed and a narrative summary  
47 produced independently (by CB, EM, LP). This was thought to be a more effective way of scrutinising  
48 codes than simply checking coding or having two researchers code the data. The narratives were  
49 then compared and discussed in further data workshops. Finally a combined narrative was produced  
50 for each theme which incorporated the insights and perspectives of different researchers. In a final  
51 stage, each transcript was reread in conjunction with the narrative to identify any missing data or  
52 issues that had not been captured.  
53  
54  
55  
56  
57  
58  
59  
60

Quotations indicate the focus group (numbered FG1 to FG6), unique participant identifier and gender.

## RESULTS

Of the 54 people invited to take part, 31 agreed to participate in a task group; six groups were completed, each with between three and seven participants. The majority of participants were female (n=21, 68%). Around half the sample (n=15, 48%) were aged between 60-69 years; 13 (42%) were between 40-59 years and three (10%) were 70+ years. Eighteen (58%) knew family members or friends with dementia; a small number had personal experience of proactive approaches to identifying dementia.

Four overarching themes were identified, each of which had several subthemes (Table 1). A key theme related to confusion around dementia and proactive approaches. Other themes related to views on proactive approaches, how these might be enacted in practice and alternative approaches that could potentially facilitate the early detection of dementia or reduce risk at a population level.

### Confusion around dementia and proactive approaches

Throughout the task groups there was evidence of limited understandings of dementia and difficulties in distinguishing between approaches such as case finding in high risk groups, risk assessment and genetic screening. We therefore use the generic term '*proactive approaches*' for all of these activities and only differentiate between them where participants were clearly discussing a specific approach. Examples of confusion are illustrated in Box 2 and described below.

#### Limited understandings of dementia

Participants' understanding of dementia varied, even among those with personal experience of the illness. Uncertainty was expressed about the illness trajectory; boundaries between age-related memory decline, mild cognitive impairment and dementia; and the relationship between dementia and specific subtypes e.g. Alzheimer's disease (Box 2).

All task groups discussed the stigma surrounding dementia which was thought to contribute to the lack of understanding of the condition and a reluctance to be open about symptoms. The fear of dementia was linked to the absence of a cure, potential loss of personhood and devastating effects of advanced dementia which were often conveyed through the language used when talking about people with dementia. Nevertheless many participants felt that societal attitudes towards dementia were improving and drew parallels with other once stigmatising conditions, such as cancer.

#### Making sense of proactive approaches

Discussion around specific proactive approaches – case finding, risk assessment and genetic screening – revealed that participants often confused the different methods, sometimes attributing consequences to one approach which related to another. For example, while risk reduction behaviour could reduce the number of people with dementia, case finding would have no impact on prevalence. This distinction was not, however, understood by participants. Participants also voiced opinions which suggested a lack of understanding of specific methods. For example, one participant seemed to think that the case finding method would result in the clear identification of individuals who were going to develop dementia in the future, rather than on identifying those with known risk factors (Box 2).

1  
2  
3 The role of genes in dementia similarly seemed to be widely misunderstood by participants. While  
4 several participants suggested that genetic screening was the most useful of the proactive  
5 approaches, their comments seemed to be based on an implicit assumption that a definitive genetic  
6 test is available. Few participants seemed to have understood that a deterministic genetic test is  
7 currently only relevant to a small number of individuals with Alzheimer's disease. Although this  
8 information was included in the presentation, it did not seem to have been understood by  
9 participants many of whom perceived risk of dementia to be largely determined by their personal  
10 family history. One participant, who had previously discussed genetic screening in relation to  
11 another condition, seemed more aware of the nuanced nature of the information, highlighting the  
12 value of personal experience in understanding the issues.  
13

14  
15 There was a widespread tendency for many participants to see the proactive approaches as  
16 providing more definitive information than is the case. The uncertainties surrounding proactive  
17 approaches were challenging for many participants and the importance of help with interpreting  
18 information about risk and how to act on it were stressed.  
19  
20

### 21 22 **Views on proactive approaches to dementia**

23 Despite their confusion about dementia and proactive approaches, several participants expressed  
24 generally positive views towards the concept of proactive approaches, such as 'the earlier the  
25 diagnosis the better', without articulating any specific benefits of different methods. Some  
26 participants valued general information on risk reduction but not detailed information about their  
27 personal risk of developing dementia. Only one participant commented that attitudes to proactive  
28 approaches in the abstract might change if personally faced with such approaches. In light of varied  
29 individual preferences one participant suggested that individuals should be provided with a range of  
30 options (Box 3).  
31  
32

### 33 **Perceived benefits and limitations of proactive approaches to dementia**

34 While some participants questioned the value of proactive approaches for a condition for which no  
35 cure was available, others valued the possibility of reducing risk and/or accessing disease-slowing  
36 treatment (Box 3). Early diagnosis and, to a lesser extent, information on risk were also thought to  
37 facilitate planning for the future, both for the individual affected and – often more importantly –  
38 their families. Participants acknowledged that a significant limitation of proactive approaches was  
39 the fact that information did not automatically result in behaviour change. Regardless of whether or  
40 not individuals chose to act on risk information, some participants felt that providing such  
41 information increased individual choice.  
42  
43

### 44 **Psychological consequences of proactive approaches**

45 Views on the psychological consequences of proactive approaches varied. Participants who had  
46 undergone either formal or informal assessment for memory problems described their relief on  
47 finding that they did not have dementia; others felt that even receiving a diagnosis of dementia  
48 could be a relief. In contrast, other participants felt that proactive approaches while they were  
49 asymptomatic (e.g. genetic screening, risk assessment) could create considerable anxiety (Box 3).  
50  
51

52 Perceptions of dementia were thought to influence the psychological consequences of proactive  
53 approaches; participants felt that people who associated dementia with advanced disease would be  
54 afraid of finding out that they were at risk or had a diagnosis of dementia. While discussions focused  
55  
56  
57  
58  
59

1  
2  
3 primarily on the psychological impacts of being given information about risk or possible diagnosis of  
4 dementia, the potential of proactive approaches to generate stress and anxiety was also highlighted.  
5  
6

### 7 8 **Practical issues in enacting proactive approaches**

9 This theme explores the suggestions made by participants about how proactive approaches might be  
10 integrated into practice and the challenges and questions this may raise.  
11

#### 12 **Existing and potential new opportunities for implementation**

13 The most common suggestion for introducing proactive approaches was to embed them in routine  
14 health check-ups, for example, the annual health review of older adults. Since this approach would  
15 focus only on people over a certain age, and dementia can occur in younger adults (e.g. those with  
16 learning disabilities), routine risk assessments for younger adults, especially those at high risk, were  
17 also suggested.. This was seen as preferable to introducing a new approach focusing exclusively on  
18 dementia and thought by participants to 'normalise' the inclusion of potentially anxiety provoking  
19 questions concerning memory loss (Box 4). To address rising GP workload and financial pressures on  
20 services, participants suggested that self-completion questionnaires linked to patient records could  
21 be used or that other members of the primary care team could be involved. A few participants  
22 suggested that alternative venues such as community centres or health buses, would offer more  
23 relaxed environments for proactive approaches.  
24  
25  
26

#### 27 **Barriers to implementation of proactive approaches**

28 Participants identified three main barriers to implementing a proactive approach in primary care:  
29 access to GPs; a lack of continuity of care and the perceived reluctance of people with dementia to  
30 acknowledge their problems and seek help. Participants highlighted the difficulties in getting  
31 appointments with GPs and the limited time available within appointments. While participants felt  
32 that discussing concerns about memory problems would be easier with a GP with whom they had an  
33 established relationship, many had experienced a lack of continuity of care (Box 4).  
34  
35

36 In addition to these problems, a number of barriers to early diagnosis were identified. Participants  
37 suggested that people with dementia or memory problems might be reluctant to seek help and that  
38 even those seen by a GP might present themselves in ways which hid their difficulties. Participants  
39 acknowledged the tendency to underestimate alcohol or cigarette consumption and thought that  
40 similar behaviour would apply to questions about memory. Concerns were also raised about the  
41 ability of people with memory problems to recognise their own difficulties. In light of these  
42 concerns, there was a general preference for 'objective' tests (i.e. genetic or blood tests - which are  
43 not currently available) which did not rely on self-reported information.  
44  
45  
46  
47

#### 48 **Ethical considerations**

49 Participants identified a number of ethical issues relating to proactive approaches. Some felt that  
50 seeking consent prior to proactive approaches was essential to enable patients to make informed  
51 decisions and prevent distress. Participants felt that time and support was needed to ensure that  
52 patients fully understood the purpose, potential outcomes and implications of tests and did not  
53 simply comply with any questions asked by their GP. Particular concerns were raised about the case  
54 finding approach and how this would be integrated into routine consultations (Box 4).  
55  
56  
57  
58

1  
2  
3 Participants stressed the importance of providing appropriate support services (particularly for  
4 people with no close family and limited social networks) prior to introducing proactive approaches.  
5 One person with experience of genetic screening highlighted the need for emotional support during  
6 the process. A final ethical issue raised during the task groups was the possibility of increasing stigma  
7 towards individuals who developed dementia (regardless of whether or not they had taken steps to  
8 reduce the risk of developing the disease). This was particularly evident during some task groups in  
9 which participants spoke pejoratively about individuals who were perceived not to respond  
10 'appropriately' to risk information.  
11  
12  
13

### 14 15 **Alternatives to proactive approaches**

16 In addition to discussing integration of proactive approaches in primary care, participants suggested  
17 introducing approaches to target behaviour change at a population level including increasing  
18 awareness of dementia and health promotion or policy initiatives to address risk factors.  
19

#### 20 **Raising awareness of dementia across the life course**

21 Increasing awareness of dementia was seen as key to: reducing stigma; improving integration of  
22 people with dementia; and encouraging people to seek help at an earlier stage. Although awareness  
23 raising was discussed in all but one of the task groups, the emphasis varied markedly between  
24 groups. Awareness raising was generally seen as relevant to the entire population. Existing UK  
25 initiatives such as Dementia Friends<sup>25</sup> and the Prime Minister's Challenge<sup>26</sup> were viewed positively  
26 (Box 5).  
27  
28

29 Initiatives to raise dementia awareness among specific groups including older people and children  
30 were discussed by some groups. Some participants felt that including children was essential to effect  
31 a societal change, others argued against targeting younger generations either to avoid burdening  
32 them with information about dementia or because of perceptions that they were less likely to  
33 engage with an illness strongly related to older age.  
34  
35

36 Having accessible information presented by a credible source was key to awareness raising. One  
37 participant emphasised the importance of avoiding 'medical jargon' and presenting information that  
38 people could relate to. A range of existing opportunities for disseminating information were  
39 suggested including information in GP surgeries, community centres and patient participation  
40 groups.  
41  
42

#### 43 **Health promotion: policy and practice initiatives**

44 A number of aspects of health promotion were discussed by participants including the extent to  
45 which dementia-specific advice was needed and the most appropriate age group to target. There  
46 was a general consensus that health promotion should not focus specifically on dementia, but  
47 prioritise a healthy lifestyle. As with awareness raising, views differed over whether health  
48 promotion campaigns should target children and the role of schools in promoting a healthy lifestyle  
49 (Box 5).  
50  
51

52 Support at a government level was clearly relevant to both awareness raising and health promotion.  
53 However, concerns over the lack of reach of these types of initiatives, led some participants to  
54 suggest that policy changes might be more effective. Taxing certain foods or enforcing limits on the  
55 food industry were most frequently suggested as ways of 'enforcing' a healthier lifestyle. While the  
56  
57  
58

1  
2  
3 former was welcomed by some, others were concerned about the potential loss of individual  
4 freedom. Concerns were expressed about frequently changing advice on healthy diet and lifestyle  
5 since this created uncertainties over how to act on such information and potentially undermined the  
6 potential value of both health promotion and providing risk information.  
7

## 8 DISCUSSION

9  
10 Although presentations were embedded within each task group to introduce dementia case finding,  
11 dementia risk assessment and genetic screening, these were insufficient to ensure that participants  
12 fully understood the key concepts. They were, however, able to comment on the general principles  
13 underlying earlier diagnosis and risk assessment for dementia. Earlier diagnosis was generally  
14 welcomed by all participants but views varied regarding risk assessment and genetic screening prior  
15 to the emergence of symptoms. There was a preference to embed risk assessment within routine  
16 health checks, which focused on achieving a healthier lifestyle, rather focusing specifically on  
17 dementia. Participants felt that such health checks should be more widely available and provided by  
18 a range of health professionals, including nurses. They also emphasised the need to explore  
19 preferences and ensure individuals understand what is involved prior to introducing proactive  
20 approaches into routine practice. The confusion evident during the task groups confirms the  
21 importance of providing accessible information to enable people to make informed decisions. While  
22 participants expressed a strong preference for objective measures rather than those relying on self-  
23 reported behaviour, this is at odds with the types of risk assessment tools currently available.  
24 Although participants also spoke positively about the need for population approaches to promoting  
25 healthy lifestyles, some recognised the potential for negative consequences for individuals who did  
26 not adopt recommended lifestyle changes.  
27  
28  
29  
30

31 The confusion amongst our public participants around dementia as a condition, and approaches to  
32 its earlier identification, is unsurprising in an area where professionals themselves struggle to  
33 achieve consensus<sup>27 28</sup> and expert diagnostic classifications change<sup>29</sup>. However in terms of public  
34 attitudes towards earlier diagnosis of dementia, our findings mirror a systematic review which found  
35 that both people with and without cognitive impairment wanted to know sooner, rather than later,  
36 if they had dementia in order to better prepare for their future<sup>30</sup>. Notwithstanding one of the key  
37 challenges around introducing approaches to the earlier identification of people with dementia, and  
38 also those at higher risk, is a continuing professional stigma around using the diagnostic label of  
39 dementia and opening saying the D word to patients despite increasing public awareness campaigns<sup>31</sup>.  
40 Variations in international clinical practice around the use of Mild Cognitive Impairment as a  
41 diagnostic label further increase professional inconsistencies<sup>32</sup>.  
42  
43  
44

45 In terms of identifying those at higher risk of developing dementia, it is interesting to note our  
46 participants' preference for such approached to be part of an integrated, holistic approach to  
47 maintaining health in mid/later life rather than dementia specific initiatives. Such results lend  
48 support to current research evaluating holistic health and wellbeing risk appraisal tools.<sup>33</sup> Earlier  
49 qualitative research exploring public knowledge of dementia risk factors and views on risk reduction  
50 approaches found reasonably good knowledge of factors which contribute to healthy ageing.<sup>19</sup>  
51 Interestingly fear of developing dementia, and the need to improve public knowledge about  
52 dementia, were considered major motivators amongst participants towards adopting a healthier  
53 lifestyle and improved health behaviours.<sup>19</sup>  
54  
55  
56  
57  
58  
59  
60

1  
2  
3 Our qualitative study had several limitations. Data collection ceased due to time limitations on the  
4 study period; theoretically data collection should have continued until data saturation was achieved.  
5 This study explored the perceptions of members of the public, none of whom had dementia. The  
6 focus was therefore on case finding, risk assessment/reduction and genetic screening as abstract  
7 concepts; participants' views may differ when facing such activities at a personal level. The limited  
8 public understanding of dementia<sup>34</sup> was confirmed in the present study. This suggests that future  
9 studies may need to consider either focusing on a single proactive approach (e.g. genetic screening)  
10 to avoid introducing multiple concepts, or that data collection may need to be conducted over a  
11 longer period to enable participants to become familiar with the concepts and facilitate informed  
12 discussions, for example through citizens' juries.<sup>35</sup> Due to personnel changes, data analysis was  
13 conducted by researchers who had no previous involvement in the project. However, as the  
14 researchers were more distant from the data, this facilitated a more critical stance and the  
15 identification of underlying themes indirectly linked with the study objective.  
16  
17  
18

19 Recent data on the changing incidence and prevalence of dementia internationally<sup>4</sup> has generated  
20 research interest in prevention through controlling risk factors at both individual and population  
21 levels.<sup>36</sup> Whilst interim findings from a randomised controlled trial of a complex, multicomponent  
22 intervention (diet, physical exercise, brain training, vascular risk reduction) targeting individual  
23 dementia risk have revealed promising results,<sup>37</sup> the search for feasible and valid risk assessment  
24 'tools' to identify those who would benefit most from such interventions is ongoing.<sup>15</sup> There has  
25 however been little exploration of the acceptability of such approaches to patients and the public<sup>19</sup>  
26 especially in dementia where public understanding of the illness is still low.<sup>34</sup> With electronic  
27 vascular disease risk assessment tools such as Q-RISK2, which allow healthcare professionals to  
28 quickly calculate an individual's future risk,<sup>38 39</sup> now embedded in routine primary care practice,  
29 similar methods have been used to develop a dementia risk tool.<sup>16</sup> The validity of this tool is  
30 currently under study, it will however be equally important to also explore its acceptability to  
31 patients and healthcare professionals, especially if considering the possibility of patient self-  
32 administered tools in the future.<sup>40</sup> In terms of the implications for practice, our study shows that the  
33 introduction of proactive approaches to dementia identification should also be accompanied by  
34 better quality information about dementia (and the likelihood of developing dementia) and  
35 psychological support for those undergoing risk assessment as well as addressing important public  
36 concerns about the quality and availability of current dementia care.  
37  
38  
39  
40  
41

42 As international policy shifts from finding a 'cure' for dementia to focus on more efficient ways of  
43 future care provision, including reducing numbers with dementia, research opportunities are  
44 beginning to address the prevention as well as 'cure and care' agenda.<sup>36 41</sup> Accurate identification of  
45 an individual's risk of developing dementia, in order to identify those who can most benefit from  
46 appropriate intervention, will be one part of this new agenda; any future research must however  
47 also explore the ethical and personal concerns associated with any newly developed approaches to  
48 determining an individual's future risk of developing dementia. Whilst the usefulness and efficiency  
49 of general lifestyle checks have been questioned,<sup>42</sup> these may be a more acceptable way of  
50 translating dementia risk reduction approaches into usual care. The considerable confusion amongst  
51 our participants around approaches to earlier identification of both people with possible dementia  
52 and those at higher risk of developing the illness in the future suggests an urgent need for greater  
53 education focused on dementia risk and individual risk reduction.  
54  
55  
56  
57  
58  
59  
60

1  
2  
3 **Funding:** This paper presents independent research funded by the National Institute for Health  
4 Research School for Primary Care Research (NIHR SPCR), project number 261. Louise Robinson is  
5 funded by a National Institute for Health Research Professorship (NIHR-RP-011-043). The views  
6 expressed are those of the author(s) and not necessarily those of the NIHR, the National Health  
7 Service or the Department of Health.  
8

9  
10 **Contributor statement:** LR conceived the study and obtained project funding. CD and LN carried out  
11 data collection; CB, EM and LP were responsible for data analysis. All authors contributed to drafting  
12 of the paper and approved the final manuscript.  
13

14 **Copyright:** The Corresponding Author has the right to grant on behalf of all authors and does grant  
15 on behalf of all authors, [a worldwide licence](#) to the Publishers and its licensees in perpetuity, in all  
16 forms, formats and media (whether known now or created in the future), to i) publish, reproduce,  
17 distribute, display and store the Contribution, ii) translate the Contribution into other languages,  
18 create adaptations, reprints, include within collections and create summaries, extracts and/or,  
19 abstracts of the Contribution, iii) create any other derivative work(s) based on the Contribution, iv)  
20 to exploit all subsidiary rights in the Contribution, v) the inclusion of electronic links from the  
21 Contribution to third party material where-ever it may be located; and, vi) licence any third party to  
22 do any or all of the above.  
23  
24

25 **Competing interest statement:** All authors have completed the Unified Competing Interest form and  
26 declared any relevant support from any organisation for the submitted work in the previous three  
27 years. Professor Robinson reports grants from the National Institute of Health Research  
28 Professorship scheme during the conduct of the study.  
29  
30

31 **Transparency declaration:** LR affirms that the manuscript is an honest, accurate, and transparent  
32 account of the study being reported; that no important aspects of the study have been omitted; and  
33 that any discrepancies from the study as planned (and, if relevant, registered) have been explained.  
34

35 **Patient involvement:** The theme of this research was one of the key research priorities identified by  
36 the NIHR Dementia and Neurodegenerative Diseases research network (DeNDRoN) Primary Care  
37 Clinical Study Group (PCCSG), an integrated patient, public and researcher group of their last priority  
38 setting exercise. Members of this group helped refine the research proposal prior to submission to  
39 NIHR.  
40

41 **Data sharing statement:** No additional data is available.  
42  
43  
44

## 45 REFERENCES

- 46  
47  
48 1. Alzheimer's Disease International. World Alzheimer Report 2015: The Global Impact of Dementia:  
49 an Analysis of Prevalence, Incidence, Cost and Trends. London: Alzheimer's Disease  
50 International, 2015.  
51 2. Wu YT, Fratiglioni L, Matthews FE, et al. Dementia in western Europe: epidemiological evidence  
52 and implications for policy making. *Lancet Neurol* 2016;15 doi: 10.1016/s1474-  
53 4422(15)00092-7  
54 3. Larson EB, Langa KM. What's the "take home" from research on dementia trends? *PLoS One*  
55 2017;14(3):e1002236. doi: 10.1371/journal.pmed.1002236  
56  
57  
58  
59  
60



- 1
  - 2
  - 3
  4. Prince M, Ali GC, Guerchet M, et al. Recent global trends in the prevalence and incidence of dementia, and survival with dementia. *Alzheimers Res Ther* 2016;8(1):23. doi: 10.1186/s13195-016-0188-8
  - 5
  - 6
  - 7
  - 8
  - 9
  - 10
  - 11
  - 12
  - 13
  - 14
  - 15
  - 16
  - 17
  - 18
  - 19
  - 20
  - 21
  - 22
  - 23
  - 24
  - 25
  - 26
  - 27
  - 28
  - 29
  - 30
  - 31
  - 32
  - 33
  - 34
  - 35
  - 36
  - 37
  - 38
  - 39
  - 40
  - 41
  - 42
  - 43
  - 44
  - 45
  - 46
  - 47
  - 48
  - 49
  - 50
  - 51
  - 52
  - 53
  - 54
  - 55
  - 56
  - 57
  - 58
  - 59
  - 60
4. Prince M, Ali GC, Guerchet M, et al. Recent global trends in the prevalence and incidence of dementia, and survival with dementia. *Alzheimers Res Ther* 2016;8(1):23. doi: 10.1186/s13195-016-0188-8
  5. Matthews FE, Arthur A, Barnes LE, et al. A two-decade comparison of prevalence of dementia in individuals aged 65 years and older from three geographical areas of England: results of the Cognitive Function and Ageing Study I and II. *Lancet* 2013;382(9902):1405-12.
  6. Matthews FE, Stephan BCM, Robinson L, et al. A two decade dementia incidence comparison from the Cognitive Function and Ageing Studies I and II. *Nat Commun* 2016;7 doi: 10.1038/ncomms11398
  7. Alzheimer's Disease International. World Alzheimer Report 2014: Dementia and Risk Redution. London: Alzheimer's Disease International 2014.
  8. Department of Health. Prime Minister's challenge on dementia 2020. London, 2015.
  9. UK National Screening Committee. The UK NSC recommendation on screening for dementia. Jan 2015 2015 [Available from: [www.screening.nhs.uk/dementia](http://www.screening.nhs.uk/dementia) accessed 26/06/2017].
  10. World Health Organization. Draft global action plan on the public health response to dementia 2016 [Available from: [http://www.who.int/mental\\_health/neurology/dementia/action\\_plan\\_consultation/en/](http://www.who.int/mental_health/neurology/dementia/action_plan_consultation/en/) accessed 12 July 2017].
  11. Wald N, Morris J. What is case-finding? *Journal of Medical Screening* 1996;3(1):1.
  12. McCartney M. "Case finding" in dementia is simply screening with no evidence of benefit. *BMJ* 2014;349:g4791.
  13. NHS England. Commissioning for quality and innovation (CQUIN) 2014/15 guidance 2014 [Available from: <https://www.england.nhs.uk/wp-content/uploads/2014/12/sc-cquin-guid.pdf>; accessed 28 May 2017].
  14. NHS England. Enhanced Service Specification: Facilitating timely diagnosis and support for people with dementia 2015/16 2015 [Available from: <https://www.england.nhs.uk/commissioning/wp-content/uploads/sites/12/2015/03/facilitate-timly-diag-dementia.pdf> accessed 28 May 2017].
  15. Tang EYH, Harrison S, Errington L, et al. Current developments in dementia risk prediction modelling: An updated systematic review. *PLoS One* 2015;10(9):e0136181.
  16. Walters K, Hardoon S, Peterson I, et al. Predicting dementia risk in primary care: development and validation of the Dementia Risk Score using routinely collected data. *BMC Med* 2016;14(6) doi: 10.1186/s12916-016-0549-y
  17. Kivipelto M, Ngandu T, Laatikainen T, et al. Risk score for the prediction of dementia risk in 20 years among middle aged people: a longitudinal, population-based study. *Lancet Neurol* 2006;5 doi: 10.1016/s1474-4422(06)70537-3
  18. Barnes DE, Covinsky KE, Whitmer RA, et al. Dementia risk indices: A framework for identifying individuals with a high dementia risk. *Alzheimers Dement* 2010;6(2):138-41.
  19. Kim S, Sargent-Cox KA, Anstey KJ. A qualitative study of older and middle-aged adults' perception and attitudes towards dementia and dementia risk reduction. *Journal of advanced nursing* 2015;71(7):1694-703. doi: 10.1111/jan.12641 [published Online First: 2015/02/24]
  20. Martin S, Kelly S, Khan A, et al. Attitudes and preferences towards screening for dementia: a systematic review of the literature. *BMC geriatrics* 2015;15(1):66.
  21. Hersch J, Jansen J, Barratt A, et al. Women's views on overdiagnosis in breast cancer screening: a qualitative study. *BMJ : British Medical Journal* 2013;346 doi: 10.1136/bmj.f158
  22. Mair F, May C, Murray E, et al. Understanding the implementation and integration of E-Health services. London: NIHR, 2010.
  23. Tong A, Sainsbury P, Craig J. Consolidated criteria for reporting qualitative research (COREQ): a 32-item checklist for interviews and focus groups. *International journal for quality in health care* 2007;19(6):349-57.

- 1
- 2
- 3 24. Braun V, Clarke V. Using thematic analysis in psychology. *Qualitative research in psychology*
- 4 2006;3(2):77-101.
- 5 25. Alzheimer's Society. Dementia Friends [Available from: <https://www.dementiafriends.org.uk/>
- 6 accessed 26/06/2017.
- 7 26. Department of Health. Prime Minister's Challenge on Dementia 2020. London, UK: Department
- 8 of Health 2015.
- 9 27. Peterson RC, Caracciolo B, Brayne C, et al. Mild cognitive impairment: a concept in evolution.
- 10 *Journal of Internal Medicine* 2014;275(3):214-28. doi: 10.1111/joim.12190
- 11 28. Tang EY, Brayne C, Albanese E, et al. Mild cognitive impairment definitions: more evolution than
- 12 revolution. *Neurodegenerative Disease Management* 2015;5(1):11-7. doi:
- 13 10.2217/nmt.14.42
- 14 29. Sachdev PS, Blacker D, Blazer DG, et al. Classifying neurocognitive disorders: the DSM-5 approach.
- 15 *Nature Reviews Neurology* 2014;10(11):634-42. doi: 10.1038/nrneurol.2014.181
- 16 30. Van den Dungen P, van Kuijk L, van der Wouden J, et al. Preferences regarding disclosure of a
- 17 diagnosis of dementia: a systematic review. *International Psychogeriatrics*
- 18 2014;26(10):1603-18. doi: 10.1017/S1041610214000969
- 19 31. Robinson L, Gemski A, Abley C, et al. The transition to dementia—individual and family
- 20 experiences of receiving a diagnosis: a review. *International Psychogeriatrics*
- 21 2011;23(07):1026-43.
- 22 32. Whitehouse PJ, George D. Further limits on labels for cognitive impairment: can we diagnose
- 23 what we don't know? *The American Journal of Geriatric Psychiatry* 2011;19(11):984. doi:
- 24 <http://dx.doi.org/10.1097/JGP.0b013e3182330fef>
- 25 33. Walters K, Kharicha K, Goodman C, et al. Promoting independence, health and wellbeing for
- 26 older people: a feasibility study of computer-aided health and social risk appraisal system in
- 27 primary care. *BMC Fam Pract* 2017;18(47) doi: 10.1186/s12875-017-0620-6
- 28 34. Mitchell S, Ridley SH, Sancho RM, et al. The future of dementia risk reduction research: barriers
- 29 and solutions. *J Public Health* 2016:1-7. doi: 10.1093/pubmed/fdw103
- 30 35. Lenaghan Jo CA. Citizens' Juries: Theory into Practice. London: Institute for Public Policy Research
- 31 1997.
- 32 36. Anstey KK, Eramudugolla R, Hosking DE, et al. Bridging the translation gap: from dementia risk
- 33 assessment to advice on risk reduction. *J Prev Alzheimers Dis* 2015;2(3):189-98.
- 34 37. Ngandu T, Lehtisalo J, Solomon A, et al. A 2 year multidomain intervention of diet, exercise,
- 35 cognitive training, and vascular risk monitoring versus control to prevent cognitive decline in
- 36 at-risk elderly people (FINGER): a randomised controlled trial. *Lancet*;385(9984):2255-63. doi:
- 37 10.1016/S0140-6736(15)60461-5
- 38 38. Hippisley-Cox J, Coupland C, Vinogradova Y, et al. Predicting cardiovascular risk in England and
- 39 Wales: prospective derivation and validation of QRISK2. *BMJ* 2008;336(7659):1475-82. doi:
- 40 10.1136/bmj.39609.449676.25
- 41 39. Hippisley-Cox J, Coupland C, Vinogradova Y, et al. Performance of the QRISK cardiovascular risk
- 42 prediction algorithm in an independent UK sample of patients from general practice: A
- 43 validation study. *Heart* 2008;94(1):34-9. doi: 10.1136/hrt.2007.134890
- 44 40. Nolan T, Dack C, Pal K, et al. Patient reactions to a web-based cardiovascular risk calculator in
- 45 type 2 diabetes: a qualitative study in primary care. *Br J Gen Pract* 2015;65(632):e152-60. doi:
- 46 10.3399/bjgp15X683953
- 47 41. Birdi R, Stephan BC, Robinson L, et al. Can we influence the epidemiology of dementia?
- 48 Perspectives from population-based studies. *Postgrad Med J* 2015;91(1081):651-4. doi:
- 49 10.1136/postgradmedj-2015-133244
- 50 42. Frost H, Haw S, Frank J. Promoting health and well-being in later life: interventions in primary
- 51 care and community settings. Edinburgh: Chief Scientist Office, 2011.
- 52
- 53
- 54
- 55
- 56
- 57
- 58
- 59
- 60

**Table 1: Overview of themes and subthemes**

|                                                                                                                                                                                                              |
|--------------------------------------------------------------------------------------------------------------------------------------------------------------------------------------------------------------|
| Confusion around dementia and proactive approaches                                                                                                                                                           |
| <ul style="list-style-type: none"><li>• Limited understandings of dementia</li><li>• Making sense of proactive approaches</li></ul>                                                                          |
| Views on proactive approaches to dementia                                                                                                                                                                    |
| <ul style="list-style-type: none"><li>• Perceived benefits and limitations of proactive approaches</li><li>• Psychological consequences of proactive approaches</li></ul>                                    |
| Practical issues in enacting proactive approaches to dementia                                                                                                                                                |
| <ul style="list-style-type: none"><li>• Existing and potential new opportunities for implementation</li><li>• Barriers to implementation of proactive approaches'</li><li>• Ethical considerations</li></ul> |
| Alternatives to proactive approaches to dementia                                                                                                                                                             |
| <ul style="list-style-type: none"><li>• Raising awareness of dementia across the life course</li><li>• Health promotion: policy and practice initiatives</li></ul>                                           |

**Box 1: Task group content and format**

1. Pre task group questionnaire (participant demographic details; personal experience of dementia; knowledge about dementia risk factors)
2. Presentation 1: Dementia assessment and diagnosis
  - Introduction to dementia and the process of diagnostic assessment: 'facts and figures' – numbers living with dementia; knowledge to date regarding cause; clinical presentation; dementia sub-types; clinical assessment processes.
  - Case finding in high risk groups; factors contributing to dementia; groups at high risk; pro-active methods for earlier detection of dementia e.g. case finding.
3. Group discussion 1
4. Presentation 2: Dementia prevention and risk assessment
  - Risk assessment - risk factors for dementia
  - Risk assessment tools - general process of disease risk assessment and risk assessment tools; specific dementia risk assessment tools.
  - Genetic screening and potential future treatments e.g. drugs/vaccines.
5. Group discussion 2
6. Post task group questionnaire (knowledge about dementia risk factors)

**Box 2: Confusion around dementia and proactive approaches****Limited understandings of dementia**

'Now I don't know to what degree you suffer Alzheimer's, can you get milder cases, more severe cases? Do people just amble along with mild cases of dementia?' [FG3, P17, female]

'Then you say 'dementia', what do you mean? I know that's stupid but my partner's got mild cognitive impairment which could be classified as dementia, because he's got memory problems, or it might be mild cognitive impairment, which is it?' [FG2, P5, female]

'Dementia as far as I'm aware, dementia is one form of Alzheimer's disease' [FG2, P6, male]

'I think language is very powerful. You know, when I was younger, people who had memory problems, do you know, they were a bit wandered you know, they were just getting a bit worn out, you know. The language was kind, but, you talk about dementia, dementia, demented, crazy, and that, that, that encourages people to flee from it, to conceal it and not to share it-' [FG2, P10, male]

**Making sense of proactive approaches**

'Does it not smack a bit of Big Brother if you're having a register? 'This person is going to get dementia. This person is going to get dementia. This person isn't.' It smacks of Big Brother sort of...' [FG5, P24, male]

'I don't really know what genetic testing amounts to. It was mooted to me once because I've got an eye condition and it might be genetic, that it was possible to have that done. I was advised that it's quite a big process to go through and it might not give you anything clear at the end of the day. '[FG6, P31, male]

'I mean you really can't prove that if you're like say - do more exercise, change your diet and all that, will it stop you getting that?' [FG3, P14, male]

'And then it [health check] came back with a letter, with a big long 'score this for this, and this for that' but it didn't explain what those numbers meant.' [FG1. P4, female]

**Box 3: Views on proactive approaches****General views on proactive approaches**

'I don't want to know that I might be going to get it. I don't mind being told that, "If you do this, this and this you're less likely to have it", just as with heart disease or anything like that.' [FG3, P11, female]

'But perhaps you need different ways, different tools, because what we seem to be saying is that different things suit different people.' [FG2, P9, female]

**Perceived benefits and limitations of proactive approaches**

'But I think the point here is if you've got high cholesterol there's a blood test that shows that and the doctor can do something about it. If you're going to develop dementia it's no good telling me unless you can cure it, I can do something myself about it or you can help me.' [FG3, P16, male]

'If there's medication which can slow it down, delay it or whatever and I could have that medication I would be silly to not have it.' [FG5, P27, female]

'...with dementia, I think I would like to know so I could get my life ironed out for my kids, because I wouldn't like to leave them in dire straits.' [FG4, P22, female]

'I think an early diagnosis might be quite frightening at the time but I think it's only fair on your family so that they know what's happening for you and for them to prepare themselves as well for what might happen, if they would be prepared to look after you or if they feel you might need to go into care' [FG3, P17, female]

'The majority of people will say, "It will never happen to me anyway. I don't need that test. I only smoke 20 fags a day and my neighbour smokes 30 so he's far more likely to..." [FG3, P16, male]

'You can choose to ignore it, but you've been given the information and it's your choice what you do with it, whereas at the minute, it's not there.' [FG6, P30, female]

**Psychological consequences of proactive approaches**

'But there was no sign of it [dementia] in my brain at all. Now I think that was fantastic. I now know that there was no sign of it and that's really, really reassuring.' [FG5, P23, female]

'Do I really want to have the worry about me? It may happen. If I had symptoms of it, then like yourself I would go and probably find out. But I don't feel like I've got symptoms of it, so I don't really want to know that I could have it when I haven't got it, when I feel...' [FG5, P28, female]

'I think there are a percentage of people who wouldn't want to know because they're so scared of the diagnosis because they've seen what happens to people. They've seen relatives go into nursing homes and the eventual outcome.' [FG6, P29, female]

'I did some of these cognitive tests on the internet and I got myself really upset and stressed when I thought I wasn't hitting the time allowed. I dropped out of that because I felt under pressure.' [FG3, P17, female]

**Box 4: Existing and potential new opportunities for implementation****Existing and potential new opportunities for implementation**

'My doctors have started to do an annual review of people, so on their birthday they call you in, you go and see the practice nurse and they give you an MOT certificate, basically. So it could be at that point that if memory things were introduced to that kind of review... That's just a standard thing so everybody understands that they're going to go through that test, or whatever, then I think incorporating in that could help.' [FG3, P11, female]

'So you could have that health check on all those things, the blood pressure and if that regardless of age, so you don't have to hit the 60 box, if that health check put you in those risk factors then there's follow-up and questions asked about memory' [FG4, P20, female]

'You can go into your doctor's surgery and you don't necessarily have to see a doctor now do you? No, you're seeing a practice nurse. It could be at that level that the tests are done and the risks are quoted to you. Then if you felt that you needed to see a doctor to explain it more or to give you better information...' [FG3, P16, male]

'I think rather than saying, "Oh, go to the GPs." I haven't been there for three years and I don't need to go there now. Things popping up, but things more widespread across the community so that people will come across them more frequently. In what shape or form, I suppose that's debateable' [FG6, P31, male]

**Barriers to implementing proactive approaches**

'It's getting appointments to see them, that's the problem. From personal experience, trying to get to see a GP, you just give up.' [FG6, P31, male]

'They're too busy. You know, you don't get enough time to do anything like that in my GP's surgery. You never, ever get it, because you don't get enough minutes' appointment.' [FG1, P4, female]

'There's none of the continuity like when you were smaller; we had a family doctor who was there for everybody's health for 50 years.' [FG5, P27, female]

'I do tend to try and- well, I do think I tell the truth in these questionnaires. But you may think, you've got a different idea, perhaps, than somebody else. You might under-exaggerate, or over-exaggerate. You think you're telling the truth, but actually...' [FG1, P1, female]

'People with dementia, in the early stages, will hide the fact that they've got a problem and can sometimes fool quite a lot of people a lot of the time.' [FG3, P11, female]

'It also requires people to have insight into their memory problem and often people just haven't, have they?' [FG2, P9, female]

**Ethical considerations**

'As long as it's an informed consent, but, I think, often [patients] will go with what the GP says because they trust their GP so it's a big responsibility.' [FG2, P5, female]

'You're going to get a lot of people who will go to the GP for a completely different reason and the GP might turn round and say, "Do you think you have a memory problem?" You think, "Well, I've come about my in-growing toenail. No, I don't. I'm not here about that."' [FG6, P29, female]

'I think you would need counselling [...] yes, but then the whole thing and then it hits you on an

1  
2  
3 emotional level and that's what you need help.' [FG2, P8, female]  
4

5 'If you are going to put yourself forward to identify your risk of dementia, then you want to know what  
6 will happen if you are at high risk of dementia. What services are out there, what's the support,  
7 available and if there's nothing available for you, you might think, "Well, what's the point of knowing."  
8 [FG2, P9, female]  
9

10 'There's always going to be a percentage of the population, it's whether it's to do with health, whether  
11 it's to do with whatever, who just don't give a s\*\*\*. But also - but that impacts upon us, because  
12 eventually we're going to have to pay for the people who don't give a s\*\*\*. [FG4, P20, female]'  
13  
14  
15  
16  
17  
18  
19  
20  
21  
22  
23  
24  
25  
26  
27  
28  
29  
30  
31  
32  
33  
34  
35  
36  
37  
38  
39  
40  
41  
42  
43  
44  
45  
46  
47  
48  
49  
50  
51  
52  
53  
54  
55  
56  
57  
58  
59  
60



**Box 5: Alternatives to proactive approaches****Raising awareness of dementia across the life course**

'I mean, the dementia friends thing [...] if you can get everybody, you can get kids at school to understand how they can best talk to Granny, how they can react to somebody in the street who is wandering or who's talking to themselves, how to be nice to the person, how to support them.'  
[FG2, P7, female]

'I think acceptance of it, even it was part of primary/secondary, actually getting it in the schools and getting it at that young age to understand that they're not that person. It's just part of a condition they've got, and acceptance.' [FG6, P30, female]

'Having taught in an FE college and taught health and social care subjects, 16 to 19 year olds think they're going to live forever. When you try to talk to them about smoking and drinking, it's just over the top of their head. I don't know. Even if they've had experience of grandparents with dementia they think, "It's never going to happen to me and I'm going to live forever and who cares what happens to me when I get to 65?"' [FG6, P29, female]

**Health promotion: policy and practice initiatives**

'There's a general advice there that's not specific to dementia [...] there's a generic thing going on about 'well if you want to keep your heart going, you need to give up smoking'. It's the same things. So maybe we need to actually pull dementia or the risks of dementia into that general health and wellbeing better than perhaps we're currently doing.' [FG4, P19, male]

'The schools have enough on their plate with directives coming to say, "You must teach X amount of maths, English and science" and that's push, push, push. They don't leave a lot of time. They've taken less PE. So schools don't have that facility' [FG3, P12, female]

'Not everybody is going to get that education, not everybody is going to listen to that education. And there's parental influence on it, social influence on it, economic influence on it. So I think you've got sort of - I believe very strongly in personal choice, but I think there's a point where you've got to look at it more on a sort of society level.' [FG4, P18, male]

With healthy eating, at least now they're going to put this sugar tax on, but I would put tax on a load of other things like that. [FG3, P14, male]

'The trouble is with these diets, again, you get it in the papers, "Don't drink tea, because it's got this... Don't drink coffee because it's got that." And then a few months down the line, "Oh, tea's good for you. Coffee is good for you." What do you believe?' [FG4, P22, female]

## COREC checklist

### Domain 1: Research team and reflexivity

| Personal Characteristics |                                                                                 |                                                                                                                                                                                                                                                                                                                                                                                                                                                                      |
|--------------------------|---------------------------------------------------------------------------------|----------------------------------------------------------------------------------------------------------------------------------------------------------------------------------------------------------------------------------------------------------------------------------------------------------------------------------------------------------------------------------------------------------------------------------------------------------------------|
| 1.                       | Interviewer/facilitator<br>Which author/s were involved in data collection?     | CD & LN (all task groups); LR (pilot task group only)                                                                                                                                                                                                                                                                                                                                                                                                                |
| 2.                       | Credentials<br>What were the researcher's credentials? E.g. PhD, MD             | CB - MSc<br>CD – PhD<br>EM – PhD<br>LN – MclinRes<br>LP - BSc<br>LR – MD, FRCGP                                                                                                                                                                                                                                                                                                                                                                                      |
| 3.                       | Occupation<br>What was their occupation at the time of the study?               | CB - senior research associate<br>CD - research associate<br>EM - research associate<br>LN - NIHR Academic Clinical Fellow<br>LP - research assistant<br>LR - Professor of Primary Care and Ageing                                                                                                                                                                                                                                                                   |
| 4.                       | Gender<br>Was the researcher male or female?                                    | All researchers were female                                                                                                                                                                                                                                                                                                                                                                                                                                          |
| 5.                       | Experience and training<br>What experience or training did the researcher have? | All researchers involved in data collection completed GCP training.<br>CB and CD are experienced qualitative researchers with extensive experience in dementia research.<br>LN is a general practitioner and undertook this study whilst studying for a Masters' degree which included training in qualitative methods.<br>EM is a health psychologist with previous qualitative experience gained during her PhD.<br>LP is an adult nurse with research experience. |

|                                       |                                                                                                                                                                          |                                                                                                                                                                |
|---------------------------------------|--------------------------------------------------------------------------------------------------------------------------------------------------------------------------|----------------------------------------------------------------------------------------------------------------------------------------------------------------|
|                                       |                                                                                                                                                                          | LR is an experienced dementia researcher and general practitioner                                                                                              |
| <b>Relationship with participants</b> |                                                                                                                                                                          |                                                                                                                                                                |
| 6.                                    | Relationship established<br>Was a relationship established prior to study commencement?                                                                                  | Participants in the pilot task group were known to the researchers as work colleagues; there was no prior relationship with participants in other task groups. |
| 7.                                    | Participant knowledge of the interviewer<br>What did the participants know about the researcher? e.g. personal goals, reasons for doing the research                     | Researchers discussed their interest in exploring views on case finding, risk assessment and genetic screening in dementia.                                    |
| 8.                                    | Interviewer characteristics<br>What characteristics were reported about the interviewer/facilitator? e.g. Bias, assumptions, reasons and interests in the research topic | None                                                                                                                                                           |

## Domain 2: study design

|                              |                                                                                                                                                                                                   |                                                                            |
|------------------------------|---------------------------------------------------------------------------------------------------------------------------------------------------------------------------------------------------|----------------------------------------------------------------------------|
| <b>Theoretical framework</b> |                                                                                                                                                                                                   |                                                                            |
| 9.                           | Methodological orientation and theory<br>What methodological orientation was stated to underpin the study? e.g. grounded theory, discourse analysis, ethnography, phenomenology, content analysis | Interpretive approach and thematic analysis                                |
| <b>Participant selection</b> |                                                                                                                                                                                                   |                                                                            |
| 10.                          | Sampling<br>How were participants selected? e.g. purposive, convenience, consecutive, snowball                                                                                                    | Convenience                                                                |
| 11.                          | Method of approach<br>How were participants approached? e.g. face-to-face, telephone, mail, email                                                                                                 | Face to face & poster inviting participation (Age UK); mail (Voice North). |
| 12.                          | Sample size<br>How many participants were in the study?                                                                                                                                           | 31                                                                         |

|                 |                                                                                                            |                                                                                                                                                                  |
|-----------------|------------------------------------------------------------------------------------------------------------|------------------------------------------------------------------------------------------------------------------------------------------------------------------|
| 13.             | Non-participation<br>How many people refused to participate or dropped out? Reasons?                       | 23 people were approached and either were not interested or did not attend the focus group. No information on reasons for non-participation is available.        |
| Setting         |                                                                                                            |                                                                                                                                                                  |
| 14.             | Setting of data collection<br>Where were the data collected? e.g. home, clinic, workplace                  | University (5 task groups); carers' centre (1 task group)                                                                                                        |
| 15.             | Presence of non-participants<br>Was anyone else present besides the participants and researchers?          | No. One task group was facilitated by three team members (CD, LN, LR); the remaining groups were facilitated by CD and LN.                                       |
| 16.             | Description of sample<br>What are the important characteristics of the sample? e.g. demographic data, date | Important characteristics for participants were gender, age and experience of dementia.                                                                          |
| Data collection |                                                                                                            |                                                                                                                                                                  |
| 17.             | Interview guide<br>Were questions, prompts, guides provided by the authors? Was it pilot tested?           | A structured powerpoint presentation was given by the facilitators to each task group and specific prompts for discussion were included within the presentation. |
| 18.             | Repeat interviews<br>Were repeat interviews carried out? If yes, how many?                                 | No                                                                                                                                                               |
| 19.             | Audio/visual recording<br>Did the research use audio or visual recording to collect the data?              | Yes, audio recording and full transcription                                                                                                                      |
| 20.             | Field notes<br>Were field notes made during and/or after the interview or focus group?                     | Yes                                                                                                                                                              |
| 21.             | Duration<br>What was the duration of the interviews or focus group?                                        | The duration of the task groups ranged from 51 to 120 minutes with a median of 105 minutes (mean 95 minutes)                                                     |
| 22.             | Data saturation<br>Was data saturation discussed?                                                          | Yes, during our on-going analysis.                                                                                                                               |
| 23.             | Transcripts returned                                                                                       |                                                                                                                                                                  |

|  |                                                                          |    |
|--|--------------------------------------------------------------------------|----|
|  | Were transcripts returned to participants for comment and/or correction? | No |
|--|--------------------------------------------------------------------------|----|

### Domain 3: analysis and findings

| Data analysis |                                                                                                                                                           |                                                                                |
|---------------|-----------------------------------------------------------------------------------------------------------------------------------------------------------|--------------------------------------------------------------------------------|
| 24.           | Number of data coders<br>How many data coders coded the data?                                                                                             | CB, EM & LP were involved in developing the coding frame.<br>EM coded the data |
| 25.           | Description of the coding tree<br>Did authors provide a description of the coding tree?                                                                   | Yes                                                                            |
| 26.           | Derivation of themes<br>Were themes identified in advance or derived from the data?                                                                       | Derived from the data                                                          |
| 27.           | Software<br>What software, if applicable, was used to manage the data?                                                                                    | NVivo 11                                                                       |
| 28.           | Participant checking<br>Did participants provide feedback on the findings?                                                                                | No                                                                             |
| Reporting     |                                                                                                                                                           |                                                                                |
| 29.           | Quotations presented<br>Were participant quotations presented to illustrate the themes / findings? Was each quotation identified? e.g. participant number | Yes                                                                            |
| 30.           | Data and findings consistent<br>Was there consistency between the data presented and the findings?                                                        | Yes                                                                            |
| 31.           | Clarity of major themes<br>Were major themes clearly presented in the findings?                                                                           | Yes                                                                            |
| 32.           | Clarity of minor themes<br>Is there a description of diverse cases or discussion of minor themes?                                                         | Yes                                                                            |
