# Supplementary material for: Proactive approaches to identifying dementia and dementia risk; a qualitative study of public attitudes and preferences
Source: PubMed Central journal article supplement — BMJ Open. 2018 Feb 3;8(2):e018677. doi: 10.1136/bmjopen-2017-018677 (PMC5829774; doi:10.1136/bmjopen-2017-018677), 2018-02-03
Supplement: bmjopen-2017-018677supp001.pdf [file bmjopen-2017-018677supp001.pdf]

## COREC checklist

### Domain 1: Research team and reflexivity

| Personal Characteristics |                                                                                 |                                                                                                                                                                                                                                                                                                                                                                                                                                                                      |
|--------------------------|---------------------------------------------------------------------------------|----------------------------------------------------------------------------------------------------------------------------------------------------------------------------------------------------------------------------------------------------------------------------------------------------------------------------------------------------------------------------------------------------------------------------------------------------------------------|
| 1.                       | Interviewer/facilitator<br>Which author/s were involved in data collection?     | CD & LN (all task groups); LR (pilot task group only)                                                                                                                                                                                                                                                                                                                                                                                                                |
| 2.                       | Credentials<br>What were the researcher's credentials? E.g. PhD, MD             | CB - MSc<br>CD – PhD<br>EM – PhD<br>LN – MclinRes<br>LP - BSc<br>LR – MD, FRCGP                                                                                                                                                                                                                                                                                                                                                                                      |
| 3.                       | Occupation<br>What was their occupation at the time of the study?               | CB - senior research associate<br>CD - research associate<br>EM - research associate<br>LN - NIHR Academic Clinical Fellow<br>LP - research assistant<br>LR - Professor of Primary Care and Ageing                                                                                                                                                                                                                                                                   |
| 4.                       | Gender<br>Was the researcher male or female?                                    | All researchers were female                                                                                                                                                                                                                                                                                                                                                                                                                                          |
| 5.                       | Experience and training<br>What experience or training did the researcher have? | All researchers involved in data collection completed GCP training.<br>CB and CD are experienced qualitative researchers with extensive experience in dementia research.<br>LN is a general practitioner and undertook this study whilst studying for a Masters' degree which included training in qualitative methods.<br>EM is a health psychologist with previous qualitative experience gained during her PhD.<br>LP is an adult nurse with research experience. |

|                                       |                                                                                                                                                                          |                                                                                                                                                                |
|---------------------------------------|--------------------------------------------------------------------------------------------------------------------------------------------------------------------------|----------------------------------------------------------------------------------------------------------------------------------------------------------------|
|                                       |                                                                                                                                                                          | LR is an experienced dementia researcher and general practitioner                                                                                              |
| <b>Relationship with participants</b> |                                                                                                                                                                          |                                                                                                                                                                |
| 6.                                    | Relationship established<br>Was a relationship established prior to study commencement?                                                                                  | Participants in the pilot task group were known to the researchers as work colleagues; there was no prior relationship with participants in other task groups. |
| 7.                                    | Participant knowledge of the interviewer<br>What did the participants know about the researcher? e.g. personal goals, reasons for doing the research                     | Researchers discussed their interest in exploring views on case finding, risk assessment and genetic screening in dementia.                                    |
| 8.                                    | Interviewer characteristics<br>What characteristics were reported about the interviewer/facilitator? e.g. Bias, assumptions, reasons and interests in the research topic | None                                                                                                                                                           |

## Domain 2: study design

|                              |                                                                                                                                                                                                   |                                                                            |
|------------------------------|---------------------------------------------------------------------------------------------------------------------------------------------------------------------------------------------------|----------------------------------------------------------------------------|
| <b>Theoretical framework</b> |                                                                                                                                                                                                   |                                                                            |
| 9.                           | Methodological orientation and theory<br>What methodological orientation was stated to underpin the study? e.g. grounded theory, discourse analysis, ethnography, phenomenology, content analysis | Interpretive approach and thematic analysis                                |
| <b>Participant selection</b> |                                                                                                                                                                                                   |                                                                            |
| 10.                          | Sampling<br>How were participants selected? e.g. purposive, convenience, consecutive, snowball                                                                                                    | Convenience                                                                |
| 11.                          | Method of approach<br>How were participants approached? e.g. face-to-face, telephone, mail, email                                                                                                 | Face to face & poster inviting participation (Age UK); mail (Voice North). |
| 12.                          | Sample size<br>How many participants were in the study?                                                                                                                                           | 31                                                                         |

|                 |                                                                                                            |                                                                                                                                                                  |
|-----------------|------------------------------------------------------------------------------------------------------------|------------------------------------------------------------------------------------------------------------------------------------------------------------------|
| 13.             | Non-participation<br>How many people refused to participate or dropped out? Reasons?                       | 23 people were approached and either were not interested or did not attend the focus group. No information on reasons for non-participation is available.        |
| Setting         |                                                                                                            |                                                                                                                                                                  |
| 14.             | Setting of data collection<br>Where were the data collected? e.g. home, clinic, workplace                  | University (5 task groups); carers' centre (1 task group)                                                                                                        |
| 15.             | Presence of non-participants<br>Was anyone else present besides the participants and researchers?          | No. One task group was facilitated by three team members (CD, LN, LR); the remaining groups were facilitated by CD and LN.                                       |
| 16.             | Description of sample<br>What are the important characteristics of the sample? e.g. demographic data, date | Important characteristics for participants were gender, age and experience of dementia.                                                                          |
| Data collection |                                                                                                            |                                                                                                                                                                  |
| 17.             | Interview guide<br>Were questions, prompts, guides provided by the authors? Was it pilot tested?           | A structured powerpoint presentation was given by the facilitators to each task group and specific prompts for discussion were included within the presentation. |
| 18.             | Repeat interviews<br>Were repeat interviews carried out? If yes, how many?                                 | No                                                                                                                                                               |
| 19.             | Audio/visual recording<br>Did the research use audio or visual recording to collect the data?              | Yes, audio recording and full transcription                                                                                                                      |
| 20.             | Field notes<br>Were field notes made during and/or after the interview or focus group?                     | Yes                                                                                                                                                              |
| 21.             | Duration<br>What was the duration of the interviews or focus group?                                        | The duration of the task groups ranged from 51 to 120 minutes with a median of 105 minutes (mean 95 minutes)                                                     |
| 22.             | Data saturation<br>Was data saturation discussed?                                                          | Yes, during our on-going analysis.                                                                                                                               |
| 23.             | Transcripts returned                                                                                       |                                                                                                                                                                  |

|  |                                                                          |    |
|--|--------------------------------------------------------------------------|----|
|  | Were transcripts returned to participants for comment and/or correction? | No |
|--|--------------------------------------------------------------------------|----|

### Domain 3: analysis and findings

| Data analysis |                                                                                                                                                           |                                                                                |
|---------------|-----------------------------------------------------------------------------------------------------------------------------------------------------------|--------------------------------------------------------------------------------|
| 24.           | Number of data coders<br>How many data coders coded the data?                                                                                             | CB, EM & LP were involved in developing the coding frame.<br>EM coded the data |
| 25.           | Description of the coding tree<br>Did authors provide a description of the coding tree?                                                                   | Yes                                                                            |
| 26.           | Derivation of themes<br>Were themes identified in advance or derived from the data?                                                                       | Derived from the data                                                          |
| 27.           | Software<br>What software, if applicable, was used to manage the data?                                                                                    | NVivo 11                                                                       |
| 28.           | Participant checking<br>Did participants provide feedback on the findings?                                                                                | No                                                                             |
| Reporting     |                                                                                                                                                           |                                                                                |
| 29.           | Quotations presented<br>Were participant quotations presented to illustrate the themes / findings? Was each quotation identified? e.g. participant number | Yes                                                                            |
| 30.           | Data and findings consistent<br>Was there consistency between the data presented and the findings?                                                        | Yes                                                                            |
| 31.           | Clarity of major themes<br>Were major themes clearly presented in the findings?                                                                           | Yes                                                                            |
| 32.           | Clarity of minor themes<br>Is there a description of diverse cases or discussion of minor themes?                                                         | Yes                                                                            |
